# Supplementary material for: Mechanisms of SNP and melatonin effects on antioxidant and chlorophyll metabolism in postharvest okra
Source: NPJ Sci Food. 2025 Aug 25;9:188. doi: 10.1038/s41538-025-00553-1 (PMC12378788; doi:10.1038/s41538-025-00553-1)
Supplement: Supplementary file 2 — Supplementary Data 1 [file 41538_2025_553_MOESM2_ESM.xlsx]

## Sheet: Sheet1
#GO_classify1	GO_classify2	All genes	Partial genes	Gene_ID
#Total_gene		15437	34
cellular component	extracellular region	255	1	TRINITY_DN178196_c0_g1
cellular component	cell	6879	14	TRINITY_DN3102_c0_g1;TRINITY_DN8435_c1_g1;TRINITY_DN5029_c1_g1;TRINITY_DN178196_c0_g1;TRINITY_DN25001_c0_g1;TRINITY_DN21988_c0_g1;TRINITY_DN3188_c0_g1;TRINITY_DN119888_c0_g1;TRINITY_DN9613_c0_g1;TRINITY_DN4550_c0_g1;TRINITY_DN91812_c0_g1;TRINITY_DN66535_c0_g2;TRINITY_DN1740_c0_g1;TRINITY_DN350_c0_g1
cellular component	nucleoid	12	0
cellular component	membrane	4110	9	TRINITY_DN414_c3_g1;TRINITY_DN1740_c0_g1;TRINITY_DN95904_c0_g1;TRINITY_DN18335_c0_g1;TRINITY_DN3102_c0_g1;TRINITY_DN16448_c0_g1;TRINITY_DN5029_c1_g1;TRINITY_DN8435_c1_g1;TRINITY_DN13514_c0_g1
cellular component	cell junction	393	1	TRINITY_DN5029_c1_g1
cellular component	membrane-enclosed lumen	517	2	TRINITY_DN4550_c0_g1;TRINITY_DN8435_c1_g1
cellular component	macromolecular complex	2024	3	TRINITY_DN4550_c0_g1;TRINITY_DN8435_c1_g1;TRINITY_DN350_c0_g1
cellular component	organelle	5393	9	TRINITY_DN8435_c1_g1;TRINITY_DN25001_c0_g1;TRINITY_DN9613_c0_g1;TRINITY_DN4550_c0_g1;TRINITY_DN91812_c0_g1;TRINITY_DN119888_c0_g1;TRINITY_DN3188_c0_g1;TRINITY_DN1740_c0_g1;TRINITY_DN350_c0_g1
cellular component	other organism	55	0
cellular component	other organism part	55	0
cellular component	extracellular region part	61	0
cellular component	organelle part	2342	6	TRINITY_DN91812_c0_g1;TRINITY_DN8435_c1_g1;TRINITY_DN9613_c0_g1;TRINITY_DN4550_c0_g1;TRINITY_DN350_c0_g1;TRINITY_DN25001_c0_g1
cellular component	membrane part	2877	4	TRINITY_DN95904_c0_g1;TRINITY_DN16448_c0_g1;TRINITY_DN18335_c0_g1;TRINITY_DN414_c3_g1
cellular component	synapse part	10	0
cellular component	cell part	6879	14	TRINITY_DN350_c0_g1;TRINITY_DN1740_c0_g1;TRINITY_DN66535_c0_g2;TRINITY_DN91812_c0_g1;TRINITY_DN9613_c0_g1;TRINITY_DN4550_c0_g1;TRINITY_DN119888_c0_g1;TRINITY_DN3188_c0_g1;TRINITY_DN21988_c0_g1;TRINITY_DN178196_c0_g1;TRINITY_DN25001_c0_g1;TRINITY_DN5029_c1_g1;TRINITY_DN8435_c1_g1;TRINITY_DN3102_c0_g1
cellular component	synapse	11	0
cellular component	symplast	350	1	TRINITY_DN5029_c1_g1
cellular component	supramolecular complex	133	1	TRINITY_DN9613_c0_g1
molecular function	transcription factor activity, protein binding	87	0
molecular function	nucleic acid binding transcription factor activity	666	1	TRINITY_DN25001_c0_g1
molecular function	catalytic activity	7529	19	TRINITY_DN66535_c0_g2;TRINITY_DN1740_c0_g1;TRINITY_DN41399_c0_g1;TRINITY_DN4550_c0_g1;TRINITY_DN13558_c0_g1;TRINITY_DN5855_c0_g1;TRINITY_DN15624_c0_g1;TRINITY_DN178196_c0_g1;TRINITY_DN3102_c0_g1;TRINITY_DN16448_c0_g1;TRINITY_DN5029_c1_g1;TRINITY_DN106842_c0_g2;TRINITY_DN2381_c6_g1;TRINITY_DN11554_c0_g1;TRINITY_DN119888_c0_g1;TRINITY_DN91812_c0_g1;TRINITY_DN18335_c0_g1;TRINITY_DN21988_c0_g1;TRINIT…
molecular function	signal transducer activity	107	1	TRINITY_DN1740_c0_g1
molecular function	structural molecule activity	467	0
molecular function	transporter activity	901	2	TRINITY_DN95904_c0_g1;TRINITY_DN414_c3_g1
molecular function	binding	7100	18	TRINITY_DN4550_c0_g1;TRINITY_DN25001_c0_g1;TRINITY_DN15624_c0_g1;TRINITY_DN13558_c0_g1;TRINITY_DN44548_c1_g1;TRINITY_DN8435_c1_g1;TRINITY_DN16448_c0_g1;TRINITY_DN27863_c0_g2;TRINITY_DN2381_c6_g1;TRINITY_DN125740_c0_g1;TRINITY_DN167237_c0_g1;TRINITY_DN3188_c0_g1;TRINITY_DN119888_c0_g1;TRINITY_DN18335_c0_g1;TRINITY_DN21988_c0_g1;TRINITY_DN13514_c0_g1;TRINITY_DN16863_c0_g1;TRINITY_DN42822_c0_g2
molecular function	electron carrier activity	92	0
molecular function	antioxidant activity	118	0
molecular function	metallochaperone activity	3	0
molecular function	protein tag	10	0
molecular function	translation regulator activity	1	0
molecular function	nutrient reservoir activity	36	0
molecular function	molecular transducer activity	90	1	TRINITY_DN1740_c0_g1
molecular function	toxin activity	2	0
molecular function	molecular function regulator	254	2	TRINITY_DN3102_c0_g1;TRINITY_DN125740_c0_g1
biological process	reproduction	590	2	TRINITY_DN277505_c0_g1;TRINITY_DN15624_c0_g1
biological process	cell killing	3	0
biological process	immune system process	160	1	TRINITY_DN4550_c0_g1
biological process	behavior	15	0
biological process	metabolic process	6289	13	TRINITY_DN350_c0_g1;TRINITY_DN1740_c0_g1;TRINITY_DN66535_c0_g2;TRINITY_DN4550_c0_g1;TRINITY_DN91812_c0_g1;TRINITY_DN119888_c0_g1;TRINITY_DN21988_c0_g1;TRINITY_DN18335_c0_g1;TRINITY_DN277505_c0_g1;TRINITY_DN15624_c0_g1;TRINITY_DN13514_c0_g1;TRINITY_DN8435_c1_g1;TRINITY_DN16448_c0_g1
biological process	cellular process	6512	15	TRINITY_DN1740_c0_g1;TRINITY_DN350_c0_g1;TRINITY_DN4550_c0_g1;TRINITY_DN9613_c0_g1;TRINITY_DN91812_c0_g1;TRINITY_DN119888_c0_g1;TRINITY_DN178196_c0_g1;TRINITY_DN21988_c0_g1;TRINITY_DN18335_c0_g1;TRINITY_DN15624_c0_g1;TRINITY_DN277505_c0_g1;TRINITY_DN8435_c1_g1;TRINITY_DN13514_c0_g1;TRINITY_DN16448_c0_g1;TRINITY_DN3102_c0_g1
biological process	reproductive process	583	2	TRINITY_DN277505_c0_g1;TRINITY_DN15624_c0_g1
biological process	biological adhesion	10	0
biological process	signaling	574	2	TRINITY_DN1740_c0_g1;TRINITY_DN21988_c0_g1
biological process	multicellular organismal process	981	2	TRINITY_DN15624_c0_g1;TRINITY_DN9613_c0_g1
biological process	developmental process	1104	2	TRINITY_DN15624_c0_g1;TRINITY_DN9613_c0_g1
biological process	growth	166	0
biological process	locomotion	38	0
biological process	single-organism process	4594	11	TRINITY_DN8435_c1_g1;TRINITY_DN13514_c0_g1;TRINITY_DN5029_c1_g1;TRINITY_DN18335_c0_g1;TRINITY_DN21988_c0_g1;TRINITY_DN277505_c0_g1;TRINITY_DN15624_c0_g1;TRINITY_DN9613_c0_g1;TRINITY_DN91812_c0_g1;TRINITY_DN95904_c0_g1;TRINITY_DN1740_c0_g1
biological process	rhythmic process	59	0
biological process	response to stimulus	2444	6	TRINITY_DN277505_c0_g1;TRINITY_DN1740_c0_g1;TRINITY_DN25001_c0_g1;TRINITY_DN21988_c0_g1;TRINITY_DN4550_c0_g1;TRINITY_DN8435_c1_g1
biological process	localization	1811	4	TRINITY_DN9613_c0_g1;TRINITY_DN95904_c0_g1;TRINITY_DN5029_c1_g1;TRINITY_DN414_c3_g1
biological process	multi-organism process	584	1	TRINITY_DN4550_c0_g1
biological process	biological regulation	3024	10	TRINITY_DN15624_c0_g1;TRINITY_DN25001_c0_g1;TRINITY_DN21988_c0_g1;TRINITY_DN3102_c0_g1;TRINITY_DN8435_c1_g1;TRINITY_DN125740_c0_g1;TRINITY_DN1740_c0_g1;TRINITY_DN3188_c0_g1;TRINITY_DN4550_c0_g1;TRINITY_DN9613_c0_g1
biological process	cellular component organization or biogenesis	1371	7	TRINITY_DN3102_c0_g1;TRINITY_DN4550_c0_g1;TRINITY_DN8435_c1_g1;TRINITY_DN9613_c0_g1;TRINITY_DN21988_c0_g1;TRINITY_DN178196_c0_g1;TRINITY_DN277505_c0_g1
biological process	cell aggregation	5	0
biological process	detoxification	125	0
