# Supplementary material for: Mechanisms of SNP and melatonin effects on antioxidant and chlorophyll metabolism in postharvest okra
Source: NPJ Sci Food. 2025 Aug 25;9:188. doi: 10.1038/s41538-025-00553-1 (PMC12378788; doi:10.1038/s41538-025-00553-1)
Supplement: Supplementary file 3 — Supplementary Data 2 [file 41538_2025_553_MOESM3_ESM.xlsx]

## Sheet: Sheet1
#KEGG_n	19	KEGG_N	7249
#Pathway	ko_ID	Unigene	gene	Unigene_all	gene_all
Ether lipid metabolism	ko00565	1	38	19	7249	TRINITY_DN13514_c0_g1	K01115
Propanoate metabolism	ko00640	2	55	19	7249	TRINITY_DN106842_c0_g2;TRINITY_DN91812_c0_g1	K01900+K01895
Plant-pathogen interaction	ko04626	3	464	19	7249	TRINITY_DN16448_c0_g1;TRINITY_DN1740_c0_g1;TRINITY_DN41399_c0_g1	K13430+K13430+K13436
Spliceosome	ko03040	1	282	19	7249	TRINITY_DN350_c0_g1	K12874
RNA transport	ko03013	1	338	19	7249	TRINITY_DN13558_c0_g1	K03257
Glycerophospholipid metabolism	ko00564	1	126	19	7249	TRINITY_DN13514_c0_g1	K01115
RNA degradation	ko03018	1	178	19	7249	TRINITY_DN4550_c0_g1	K11600
Amino sugar and nucleotide sugar metabolism	ko00520	1	215	19	7249	TRINITY_DN66535_c0_g2	K15920
Biosynthesis of unsaturated fatty acids	ko01040	1	31	19	7249	TRINITY_DN18335_c0_g1	K00507
Protein processing in endoplasmic reticulum	ko04141	1	402	19	7249	TRINITY_DN8435_c1_g1	K04523
Glycolysis / Gluconeogenesis	ko00010	1	202	19	7249	TRINITY_DN91812_c0_g1	K01895
Citrate cycle (TCA cycle)	ko00020	1	98	19	7249	TRINITY_DN106842_c0_g2	K01900
Endocytosis	ko04144	4	267	19	7249	TRINITY_DN125740_c0_g1;TRINITY_DN13514_c0_g1;TRINITY_DN2381_c6_g1;TRINITY_DN44548_c1_g1	K12486+K01115+K07904+K07937
MAPK signaling pathway - plant	ko04016	1	343	19	7249	TRINITY_DN21988_c0_g1	K20716
Pentose and glucuronate interconversions	ko00040	1	144	19	7249	TRINITY_DN3102_c0_g1	K01051
Fatty acid metabolism	ko01212	1	83	19	7249	TRINITY_DN18335_c0_g1	K00507
Carbon metabolism	ko01200	2	408	19	7249	TRINITY_DN106842_c0_g2;TRINITY_DN91812_c0_g1	K01900+K01895
Other glycan degradation	ko00511	1	92	19	7249	TRINITY_DN11554_c0_g1	K01206
Pyruvate metabolism	ko00620	1	131	19	7249	TRINITY_DN91812_c0_g1	K01895
Glyoxylate and dicarboxylate metabolism	ko00630	1	136	19	7249	TRINITY_DN91812_c0_g1	K01895
Starch and sucrose metabolism	ko00500	1	260	19	7249	TRINITY_DN5029_c1_g1	K00696
