# Supplementary material for: Mechanisms of SNP and melatonin effects on antioxidant and chlorophyll metabolism in postharvest okra
Source: NPJ Sci Food. 2025 Aug 25;9:188. doi: 10.1038/s41538-025-00553-1 (PMC12378788; doi:10.1038/s41538-025-00553-1)
Supplement: Supplementary file 4 — Supplementary Data 3 [file 41538_2025_553_MOESM4_ESM.xlsx]

## Sheet: Sheet1
#ID	nr_Symbol	Control1_count	Control1_FPKM	Control2_count	Control2_FPKM	Control3_count	Control3_FPKM	FH1_count	FH1_FPKM	FH2_count	FH2_FPKM	FH3_count	FH3_FPKM	MT1_count	MT1_FPKM	MT2_count	MT2_FPKM	MT3_count	MT3_FPKM	SNP1_count	SNP1_FPKM	SNP2_count	SNP2_FPKM	SNP3_count	SNP3_FPKM	SNPMT1_count	SNPMT1_FPKM	SNPMT2_count	SNPMT2_FPKM	SNPMT3_count	SNPMT3_FPKM	Control1_Control2_Control3_count	Control1_Control2_Control3_FPKM	FH1_FH2_FH3_count	FH1_FH2_FH3_FPKM	MT1_MT2_MT3_count	MT1_MT2_MT3_FPKM	SNP1_SNP2_SNP3_count	SNP1_SNP2_SNP3_FPKM	SNPMT1_SNPMT2_SNPMT3_count	SNPMT1_SNPMT2_SNPMT3_FPKM	Control1_Control2_Control3_vs_MT1_MT2_MT3_DESeq2_Pvalue	Control1_Control2_Control3_vs_MT1_MT2_MT3_DESeq2_log2FC	Control1_Control2_Control3_vs_MT1_MT2_MT3_DESeq2_(Pvalue_0.01_FC_1.5)_regulated	Control1_Control2_Control3_vs_SNP1_SNP2_SNP3_DESeq2_Pvalue	Control1_Control2_Control3_vs_SNP1_SNP2_SNP3_DESeq2_log2FC	Control1_Control2_Control3_vs_SNP1_SNP2_SNP3_DESeq2_(Pvalue_0.01_FC_1.5)_regulated	Control1_Control2_Control3_vs_SNPMT1_SNPMT2_SNPMT3_DESeq2_Pvalue	Control1_Control2_Control3_vs_SNPMT1_SNPMT2_SNPMT3_DESeq2_log2FC
TRINITY_DN1096_c0_g1	--	924	113.21	1172	106.24	514	78.71	3067	191.92	1217	163.81	2240	198.58	1045	90.13	954	117.72	1435	105.81	644	84.07	778	118.02	737	111.15	576	82.85	1394	102.49	795	112.18	870	99.39	2174.67	184.77	1144.67	104.55	719.67	104.41	921.67	99.17	0.923780289827408	0.0259528947961949	normal	0.898779786736693	0.0404288285494315	normal	0.829169199233141	-0.067992
TRINITY_DN11501_c1_g1	LOC120118437	2265	147.64	5230	267.82	3218	237.35	252	8.47	151	11.45	191	8.99	5107	238.17	2830	176.52	6428	238.6	1996	132.35	2669	203.82	3178	223.98	762	56.02	4946	193.28	2198	153.02	3571	217.6	198	9.64	4788.33	217.76	2614.33	186.72	2635.33	134.11	0.99457370633627	0.00175622581661434	normal	0.657587414208928	-0.134095	normal	0.0796869179774062	-0.721336
TRINITY_DN12966_c0_g1	LOC120218765	1388	137.45	992	71.01	943	106.54	1279	66.18	327	38.76	949	68.44	1246	85.04	587	55.87	1392	78.14	751	76.46	651	74.61	572	62.23	844	96.25	1442	85.62	848	89.02	1107.67	105	851.67	57.79	1075	73.02	658	71.1	1044.67	90.3	0.0837238848276419	-0.543835	normal	0.105537778768899	-0.52809	normal	0.413891342579713	-0.266025
TRINITY_DN152802_c0_g1	LOC120155903	54	2.52	33	1.22	35	1.85	0	0	0	0	0	0	75	2.51	8	0.36	32	0.85	6	0.29	9	0.49	5	0.25	0	0	82	2.31	27	1.35	40.67	1.86	0	0	38.33	1.24	6.67	0.34	36.33	1.22	0.522201727054115	-0.607731	normal	0.0391863198907886	-2.38155	normal	0.663549642189858	-0.663486
TRINITY_DN19693_c0_g1	LOC18608748	274	132.42	711	248.07	499	276.56	191	47.44	46	30.4	121	41.98	593	197.09	374	161.91	638	164.53	581	267.9	530	292.73	700	364.62	322	187.75	653	171.94	447	220.63	494.67	219.02	119.33	39.94	535	174.51	603.67	308.42	474	193.44	0.409649045439469	-0.287253	normal	0.120089869963112	0.581292203475253	normal	0.64386708638904	-0.191331
TRINITY_DN214995_c0_g1	LOC111307422	1851	83.53	1629	57.99	1129	57.59	1250	29.11	758	39.44	1051	34.25	2408	77.9	1715	74.28	3122	80.48	632	29.1	887	46.95	1180	57.58	2565	130.27	3198	86.93	1076	51.98	1536.33	66.37	1019.67	34.27	2415	77.55	899.67	44.54	2279.67	89.73	0.389982530555762	0.209394393872423	normal	0.140103492099668	-0.502078	normal	0.258552489791013	0.438156371819341
TRINITY_DN2798_c0_g1	LOC120175477	3426	155.38	3090	112.35	1865	101.39	2725	67.85	1152	63.68	2064	72.9	3885	129.72	2221	105.78	4338	116.58	2565	118.63	1503	80.31	1999	105.62	3112	174.09	3878	105.48	2384	119.24	2793.67	123.04	1980.33	68.14	3481.33	117.36	2022.33	101.52	3124.67	132.94	0.627321767623365	-0.122821	normal	0.461643726688966	-0.213117	normal	0.819207554378917	0.0691589874817686
TRINITY_DN3772_c0_g1	LOC105778838	1354	116.62	1958	131.88	1686	164.38	877	38.97	255	25.72	713	44.32	1745	107.3	1154	94.73	2805	137.07	1333	116.4	1455	146.62	2082	193.84	907	88.49	1672	85.88	1056	96.91	1666	137.63	615	36.34	1901.33	113.03	1623.33	152.29	1211.67	90.43	0.253930065913718	-0.288395	normal	0.443419551790335	0.225243505052862	normal	0.0168184571303758	-0.619544
TRINITY_DN3772_c0_g2	LOC105778838	500	26.16	863	35.56	571	33.77	696	18.79	162	9.8	525	19.83	1165	43.66	558	27.98	1398	41.73	460	24.53	530	32.51	714	40.39	399	23.52	768	24.16	490	27.42	644.67	31.83	461	16.14	1040.33	37.79	568	32.48	552.33	25.03	0.3921256323686	0.243097327528043	normal	0.737886852015807	0.111967073495537	normal	0.249292071631776	-0.357489
TRINITY_DN3805_c0_g1	--	263	61.4	443	78.39	338	89.77	0	0	0	0	0	0	326	53.55	222	48.19	332	42.92	34	7.86	213	57.63	143	36.03	138	37.37	561	75.38	195	47.69	348	76.52	0	0	293.33	48.22	130	33.84	298	53.48	0.0476442890858947	-0.652771	normal	0.079112377052839	-1.10478	normal	0.268367018694059	-0.520468
TRINITY_DN6479_c0_g1	LOC120134515	705	49.23	1964	107.75	2150	169.84	879	31.39	346	27.87	733	36.68	1802	90.11	931	62.27	2723	108.2	1702	121.25	2190	178.96	3926	295.97	853	67.02	2773	115.75	1616	120.18	1606.33	108.94	652.67	31.98	1818.67	86.86	2606	198.73	1747.33	100.98	0.400968714110441	-0.333044	normal	0.0276754015680434	0.952735917812008	normal	0.768989022454915	-0.128791
TRINITY_DN66856_c0_g1	LOC120204638	197	8.84	674	25.57	646	33.6	441	10.52	123	6.36	307	10.24	438	15.28	280	12.62	899	23.87	594	27.42	915	49.13	1189	59.08	197	10.81	662	18.9	333	15.98	505.67	22.67	290.33	9.04	539	17.26	899.33	45.21	397.33	15.23	0.375726463203596	-0.41516	normal	0.0180228078782774	1.10826271974692	normal	0.264295408228952	-0.598297
TRINITY_DN6812_c0_g1	LOC105765286	61	3.33	41	1.76	34	2.1	2670	75.09	1170	73.78	1894	74.53	109	4.26	13	0.68	108	3.36	120	6.67	31	1.98	101	5.95	55	3.38	167	5.47	105	6.12	45.33	2.4	1911.33	74.47	76.67	2.77	84	4.87	109	4.99	0.818291012298023	0.19224280474852	normal	0.16800241689506	1.09688509622483	normal	0.179438543571377	1.03064043657724
TRINITY_DN6812_c0_g2	LOC120191912	15	0.73	148	5.7	169	9.34	24	0.61	14	0.79	24	0.85	64	2.24	131	6.14	100	2.79	30	1.5	118	6.77	166	8.78	28	1.54	73	2.15	25	1.31	110.67	5.26	20.67	0.75	98.33	3.72	104.67	5.68	42	1.67	0.538474789572934	-0.503276	normal	0.825266707898776	0.199330082444744	normal	0.0976311387428894	-1.66644
TRINITY_DN8242_c0_g1	LOC120151668	4356	424.59	9176	690.16	7502	832.88	6043	326.95	2661	300.16	4560	353.57	8457	618.97	4834	452.45	10593	598.39	6528	646.05	7473	856.9	9035	1003.8	3991	395.17	9433	544.42	4357	475.78	7011.33	649.21	4421.33	326.89	7961.33	556.6	7678.67	835.58	5927	471.79	0.314480859350831	-0.26765	normal	0.156170374259416	0.409588357160158	normal	0.109066573525442	-0.447945
TRINITY_DN8359_c0_g1	LOC120155116	713	36.62	470	19.02	447	25.96	138	3.66	4	0.24	83	3.08	584	21.49	238	11.72	674	19.75	306	16.02	145	8.73	236	13.11	518	29.97	659	20.36	583	32.03	543.33	27.2	75	2.33	498.67	17.65	229	12.62	586.67	27.45	0.0909455575357548	-0.643094	normal	0.0157733822824021	-1.04083	normal	0.988645342279278	-0.0058631
TRINITY_DN8459_c0_g1	LOC120192418	1029	97.51	2817	208.92	2874	308.81	554	27.29	391	43.24	481	33.04	2140	144.14	617	55.7	2962	158.52	2622	250.53	3642	408.13	3966	406.65	1844	200.05	4829	272.76	2460	248.36	2240	205.08	475.33	34.52	1906.33	119.45	3410	355.1	3044.33	240.39	0.0732726991608093	-0.775167	normal	0.0219022087825316	0.869684863233839	normal	0.586711004211661	0.211229061372846
TRINITY_DN8882_c0_g1	--	55	2.64	93	3.69	35	1.9	388	10.38	94	5.61	309	11.57	64	2.37	82	4.06	62	1.84	0	0	35	2.12	0	0	0	0	51	1.58	88	4.89	61	2.74	263.67	9.19	69.33	2.76	11.67	0.71	46.33	2.16	0.908063901906082	-0.0767904	normal	0.229465336059032	-1.97258	normal	0.744043458285863	-0.472473
TRINITY_DN9173_c0_g1	LOC120140412	1045	41.51	1689	49.99	1673	74.29	377	7	105	6.05	256	6.69	1795	52.05	976	36.5	2095	46.72	259	10.18	545	24.4	973	40.81	450	20.37	2734	64.86	709	28.65	1469	55.26	246	6.58	1622	45.09	592.33	25.13	1297.67	37.96	0.245344477674473	-0.331378	normal	0.0214098638362452	-1.04376	normal	0.195027502583279	-0.579636
TRINITY_DN9237_c0_g1	LOC120214053	791	42.08	591	24.9	85	5.59	328	9.1	82	5.05	215	8.28	541	20.58	241	12.07	437	13.72	235	13.04	119	7.3	254	14.23	198	12.11	454	14.4	225	13.18	489	24.19	208.33	7.48	406.33	15.46	202.67	11.52	292.33	13.23	0.261751973608194	-0.652183	normal	0.124437680138318	-0.971228	normal	0.180841694442929	-0.888994
TRINITY_DN9903_c0_g1	LOC107905589	1313	345.46	914	181.14	561	168.08	4933	668.43	1677	554.14	3688	698.7	1846	340.78	1207	293.87	1663	241.15	941	244.09	316	96.16	684	194.16	893	273.86	2775	417.3	709	194.77	929.33	231.56	3432.67	640.42	1572	291.93	647	178.14	1459	295.31	0.296285476390615	0.343719971613517	normal	0.493029801757652	-0.295732	normal	0.413573344311303	0.346125637587879
TRINITY_DN10075_c0_g1	LOC120162257	62	2.31	131	3.86	42	1.77	739	14.21	510	21.85	559	15.05	101	2.7	99	3.55	136	2.9	19	0.72	5	0.22	27	1.09	115	4.82	130	2.92	35	1.4	78.33	2.65	602.67	17.04	112	3.05	17	0.68	93.33	3.05	0.715879787344307	0.20491280482769	normal	0.0518022101812724	-1.86399	normal	0.78161688437609	0.228647769705896
TRINITY_DN10109_c0_g1	LOC105766342	364	50.1	564	56.68	443	67.4	5018	342.89	2651	414.85	3466	330.96	611	58.61	547	70.63	784	59.07	513	68.63	448	70.91	488	71.53	455	68.17	717	57.72	265	39.14	457	58.06	3711.67	362.9	647.33	62.77	483	70.36	479	55.01	0.726721178145068	0.0980120972476601	normal	0.281866944202904	0.344951450812113	normal	0.818745016829481	-0.0934706
TRINITY_DN10159_c0_g1	LOC120138671	366	8.88	312	6	264	7.24	195	2.44	78	2.16	129	2.26	358	6.24	311	7.27	574	7.98	448	11.13	256	7.3	420	11.02	383	10.42	212	3.11	239	6.22	314	7.37	134	2.29	414.33	7.16	374.67	9.82	278	6.58	0.859356406418303	-0.0598572	normal	0.222757460230692	0.483963232585833	normal	0.778344393279656	-0.159297
TRINITY_DN10183_c0_g1	--	569	20.99	646	15.47	375	14.86	622	10.16	279	10.66	443	9.8	404	11.14	467	11.85	722	12.64	354	12.13	332	11.41	445	18.24	287	10.79	652	12.89	351	9.93	530	17.11	448	10.21	531	11.88	377	13.93	430	11.2	0.200879238618806	-0.395176	normal	0.540630209911767	-0.208986	normal	0.157406225810312	-0.475473
TRINITY_DN10191_c0_g3	LOC120191000	44	2.42	39	1.69	85	5.2	22	0.62	6	0.38	18	0.72	34	1.34	88	4.64	51	1.6	95	5.33	80	5.16	58	3.45	110	6.62	100	3.31	18	1.06	56	3.1	15.33	0.57	57.67	2.53	77.67	4.65	76	3.66	0.679596357093183	-0.33597	normal	0.406768252520526	0.630728757291747	normal	0.797239117448025	0.258126
TRINITY_DN10213_c0_g1	--	987	44.46	805	29.65	478	24.12	552	12.58	144	7.13	412	13.11	998	31.79	886	37.72	995	25.54	428	20.72	465	23.38	343	15.66	408	21.47	806	23.5	213	9.96	756.67	32.74	369.33	10.94	959.67	31.68	412	19.92	475.67	18.31	0.911586329919729	-0.0356701	normal	0.095368515308469	-0.610179	normal	0.0473778755476773	-0.888296
TRINITY_DN10297_c1_g1	LOC120152184	249	10.57	282	9.42	178	8.51	1657	35.95	636	31.36	1161	35.25	555	16.75	280	11.28	436	10.62	61	2.62	149	7.41	97	4.45	525	24.96	551	13.94	217	9.73	236.33	9.5	1151.33	34.19	423.67	12.88	102.33	4.83	431	16.21	0.219730984870841	0.432550491783253	normal	0.096486257393142	-0.906559	normal	0.119094147655441	0.788779853142193
TRINITY_DN10303_c1_g1	--	121	6.36	220	8.86	164	9.42	664	18.01	490	29.69	483	18.33	130	4.84	98	4.81	203	6.06	133	6.92	220	13.71	138	7.83	217	12.33	197	6.13	163	9.38	168.33	8.21	545.67	22.01	143.67	5.24	163.67	9.49	192.33	9.28	0.12318322480866	-0.667037	normal	0.620627398610719	0.252846132704766	normal	0.768366663477891	0.164790648668078
TRINITY_DN104_c0_g1	LOC107919808	1024	37.56	1262	35.04	796	30.13	909	16.7	524	21.15	606	15.63	1145	27.64	727	24	941	19.33	579	21.79	458	16.6	577	21.4	943	35.41	1338	28.59	561	23.42	1027.33	34.24	679.67	17.83	937.67	23.66	538	19.93	947.33	29.14	0.0428321831809161	-0.517262	normal	0.0167793625965557	-0.659423	normal	0.46805760405733	-0.24153
TRINITY_DN10526_c0_g1	LOC120210603	1036	45.78	783	29	432	22.17	497	11.91	153	8.38	314	11.08	687	20.74	469	22.53	955	25.97	298	15.55	567	31.76	450	23.28	892	43.77	1239	33.51	620	31.78	750.33	32.32	321.33	10.46	703.67	23.08	438.33	23.53	917	36.35	0.111794968039297	-0.541048	normal	0.24542442683593	-0.49069	normal	0.678721781093488	0.1664863453377
TRINITY_DN10566_c0_g1	LOC120184368	62	22.49	30	8.03	108	42.74	1081	184	369	162.15	752	178.23	93	20.09	34	11.23	155	28.69	37	11.13	84	35.02	18	7.04	63	27.08	43	8.71	24	8.99	66.67	24.42	734	174.79	94	20	46.33	17.73	43.33	14.93	0.82434050337282	-0.170694	normal	0.693372343563003	-0.372517	normal	0.448832199951624	-0.769296
TRINITY_DN10656_c0_g1	LOC111285164	406	59.05	624	70.08	383	63.19	127	9.52	0	0	105	11.02	526	54.3	231	31.7	666	54.42	241	35.21	218	36.96	572	89.88	180	29.94	493	42.15	401	61.72	471	64.11	77.33	6.85	474.33	46.81	343.67	54.02	358	44.6	0.170836540356028	-0.447712	normal	0.723409709991211	-0.15985	normal	0.183920640297771	-0.541822
TRINITY_DN10657_c0_g1	LOC105764664	862	45.18	1051	43.91	711	43.81	4454	120.56	1647	97.6	3162	119.87	2002	76.09	1111	59.41	1834	55.86	1259	69.53	1080	70.18	774	46.01	898	55.57	1595	50.82	833	46.48	874.67	44.3	3087.67	112.68	1649	63.79	1037.67	61.91	1108.67	50.96	0.0361878014125021	0.497076745401025	normal	0.0738551896697964	0.513042368676657	normal	0.46553012153006	0.189596393910099
TRINITY_DN10678_c0_g1	LOC120121987	187	9.57	357	12.42	202	10.21	3522	82.36	1480	76.35	2493	81.74	229	7.31	226	9.74	312	8.03	285	13.62	179	9.45	312	15.86	138	6.5	302	8.56	319	14.93	248.67	10.73	2498.33	80.15	255.67	8.36	258.67	12.98	253	10	0.372856468023623	-0.321672	normal	0.405746884417141	0.353106745226409	normal	0.907950687736497	-0.0583893
TRINITY_DN106823_c0_g1	LOC120191248	130	4.61	178	4.97	103	3.98	712	12.8	276	11.19	476	11.96	218	5.45	180	5.9	435	8.49	196	7.07	157	6.44	45	1.66	120	4.6	291	6.07	220	8.29	137	4.52	488	11.98	277.67	6.61	132.67	5.06	210.33	6.32	0.159412753060617	0.573063952624226	normal	0.717432115502735	0.230500719579213	normal	0.354110236810502	0.476934440081923
TRINITY_DN107501_c0_g1	LOC120202104	191	13.37	406	22.3	395	31.29	10782	400.13	4767	413.04	7790	405.42	357	21.07	280	23.3	531	23.5	611	43.48	405	33.21	523	41.53	93	9.9	569	23.85	377	28.17	330.67	22.32	7779.67	406.2	389.33	22.62	513	39.41	346.33	20.64	0.575990644153776	-0.217794	normal	0.0306801191693303	0.876230002994959	normal	0.729758198606997	-0.206123
TRINITY_DN10768_c0_g1	LOC120217191	221	8.71	475	11.81	265	10.87	1653	34.17	631	24.76	1217	35.9	361	7.07	304	9.84	514	9.63	365	14.1	335	12.13	289	10.03	227	7.76	409	8.24	345	9.47	320.33	10.46	1167	31.61	393	8.85	329.67	12.09	327	8.49	0.794901960860801	-0.0860593	normal	0.356140431997427	0.350302217663611	normal	0.907107824652802	-0.0499622
TRINITY_DN10777_c0_g1	LOC120215985	644	26.78	724	22.79	577	25.16	2750	56.48	1218	53.69	1942	56.05	700	19.88	543	21.91	871	19.95	1304	51.57	767	37.2	740	31.55	243	10.57	817	19.25	360	17	648.33	24.91	1970	55.41	704.67	20.58	937	40.11	473.33	15.61	0.213576884195649	-0.309446	normal	0.0144108558727366	0.769454119475215	normal	0.0442015114844399	-0.720069
TRINITY_DN10804_c0_g1	--	96	26.37	102	21.06	80	25.04	818	115.73	485	168.14	608	120.26	189	36.39	98	24.87	257	38.84	305	82.46	33	10.48	171	50.68	23	7.38	194	30.52	150	42.97	92.67	24.16	637	134.71	181.33	33.37	169.67	47.87	122.33	26.96	0.301917488334127	0.485433708042233	normal	0.13739284042225	1.08011963981013	normal	0.861538919770007	0.141748402177177
TRINITY_DN1085_c0_g1	LOC120117319	3796	109.51	7762	175.65	6013	193.63	1210	18.3	563	17.98	988	21.07	6107	126.03	3447	95.77	9916	160.08	5760	161.58	7079	232.12	8125	245.28	2687	79.41	6443	110.56	3973	125.94	5857	159.6	920.33	19.12	6490	127.29	6988	212.99	4367.67	105.3	0.239848436319838	-0.329543	normal	0.0555027075588203	0.540082226466825	normal	0.0269413362432443	-0.599113
TRINITY_DN11028_c0_g1	LOC107889182	213	11.34	230	9.64	25	1.5	1418	38.9	229	14.06	1075	41.25	297	11.31	139	7.09	204	6.19	118	6.39	50	3.1	49	2.82	58	3.48	270	8.63	141	8.03	156	7.49	907.33	31.4	213.33	8.2	72.33	4.1	156.33	6.71	0.849066508743591	0.126009685373812	normal	0.322527763813265	-0.785702	normal	0.830192817275769	-0.177267
TRINITY_DN11114_c1_g1	LOC120184767	136	7.14	54	2.23	167	9.91	8	0.22	16	0.97	11	0.42	168	6.32	75	3.77	303	9.07	83	4.44	82	5.05	112	6.36	0	0	87	2.75	103	5.78	119	6.43	11.67	0.54	182	6.39	92.33	5.28	63.33	2.84	0.956382339175433	-0.0350285	normal	0.746989646428031	-0.224658	normal	0.345132467924738	-1.24954
TRINITY_DN11207_c0_g1	LOC110409718	111	5.81	99	4.14	62	3.79	1033	28.57	267	16.47	691	26.85	224	8.41	192	9.93	171	5.07	114	6.24	170	10.75	93	5.22	0	0	184	5.85	85	4.74	90.67	4.58	663.67	23.96	195.67	7.8	125.67	7.4	89.67	3.53	0.128607824658199	0.754581050365061	normal	0.210545751130067	0.748639265941164	normal	0.75584547543848	-0.410786
TRINITY_DN11224_c0_g1	--	2562	94.29	3648	116.76	2242	99.17	1692	34.26	627	29.22	1149	32.43	3245	90.95	1842	70.13	4232	94.33	2047	85.62	1564	76.98	1954	86.73	1740	75.13	3350	77.78	1916	76.53	2817.33	103.41	1156	31.97	3106.33	85.14	1855	83.11	2335.33	76.48	0.151441937145735	-0.299307	normal	0.145174068037928	-0.322247	normal	0.032155454408899	-0.413723
TRINITY_DN11303_c0_g1	LOC120173692	1619	78.3	2248	82.06	1077	56.52	5109	92.77	2804	113.74	3520	90.46	1916	61.23	1177	50.43	2564	63.95	1857	81.74	1277	69.79	1252	60.28	1711	93.72	3098	80.25	1470	70.18	1648	72.29	3811	98.99	1885.67	58.54	1462	70.6	2093	81.38	0.346965375729374	-0.221154	normal	0.653802088546191	0.12081129441255	normal	0.404083788871654	0.215916491410538
TRINITY_DN11308_c0_g1	LOC105774247	203	8.63	71	2.67	84	4.03	11	0.31	9	0.44	14	0.56	53	1.8	90	3.67	145	3.67	19	1.05	19	0.95	69	3.36	162	8.66	93	2.52	48	2.18	119.33	5.11	11.33	0.44	96	3.05	35.67	1.79	101	4.45	0.2257289697556	-0.800591	normal	0.0724563295436692	-1.53759	normal	0.739499419271469	-0.285096
TRINITY_DN11339_c0_g1	LOC120160247	3287	190.21	4749	178.09	3206	148.3	4660	103.85	2235	145.56	3132	92.85	4805	151.25	3214	138.4	4803	112.67	3221	136.37	2222	128.64	3182	141.71	3455	220.93	5042	124.39	2277	99.58	3747.33	172.2	3342.33	114.09	4274	134.11	2875	135.57	3591.33	148.3	0.263353581428648	-0.209862	normal	0.626883589015975	-0.111509	normal	0.475999178570039	-0.186564
TRINITY_DN11376_c0_g1	LOC120135319	58	2.67	43	1.64	32	1.55	733	16.8	403	19.93	541	17.55	70	2.14	100	4.27	134	3.34	113	5.24	69	3.68	86	3.54	88	4.55	229	6.05	69	3.27	44.33	1.95	559	18.09	101.33	3.25	89.33	4.15	128.67	4.62	0.224152244294164	0.780875890196161	normal	0.0750893396344353	1.2440246384233	normal	0.0911949600780666	1.26431005335917
TRINITY_DN11384_c0_g2	LOC18047047	491	52.57	990	85.65	600	69.73	4949	253.05	1663	237.06	3651	263.92	792	49.8	694	66.22	1163	68.79	879	78.48	611	84.68	694	84.53	378	69.4	1158	72.66	565	76.11	693.67	69.32	3421	251.34	883	61.6	728	82.56	700.33	72.72	0.877117027470833	-0.0416402	normal	0.239212118310705	0.360730656102561	normal	0.586476369615723	-0.18837
TRINITY_DN11439_c0_g1	LOC120163814	225	7.15	241	6.17	139	5	723	12.81	347	13.65	545	13.6	276	6.61	241	7.38	493	9.29	394	13.52	244	9.77	356	13.08	88	2.98	347	6.67	133	4.77	201.67	6.11	538.33	13.35	336.67	7.76	331.33	12.12	189.33	4.81	0.412072873429177	0.303392522070462	normal	0.0157108343741624	0.9836912446417	normal	0.497151519936712	-0.365217
TRINITY_DN11639_c0_g1	LOC120205099	186	3.82	141	2.3	162	3.76	916	9.71	499	11.71	582	8.63	173	2.55	295	5.84	243	2.86	169	3.56	153	3.69	162	3.6	169	3.89	378	4.71	258	5.69	163	3.29	665.67	10.02	237	3.75	161.33	3.62	268.33	4.76	0.741273887536002	0.1626961482042	normal	0.685276192181755	0.199892889905655	normal	0.315837045533277	0.503852795784357
TRINITY_DN11672_c0_g1	--	954	81.38	862	57.51	741	71.55	302	13.29	177	17.68	188	11.57	1049	63.89	463	37.65	1045	50.58	488	42.24	509	50.8	646	59.57	218	21.06	916	46.6	968	87.99	852.33	70.15	222.33	14.18	852.33	50.71	547.67	50.87	700.67	51.88	0.111424787894324	-0.479583	normal	0.222297193322819	-0.391512	normal	0.332655795662483	-0.473708
TRINITY_DN11676_c0_g1	LOC120210492	7	0.38	70	3.03	5	0.31	477	13.55	212	13.53	380	15.09	46	1.81	48	2.55	70	2.22	156	8.79	27	1.75	97	5.77	0	0	65	2.16	25	1.48	27.33	1.24	356.33	14.06	54.67	2.19	93.33	5.44	30	1.21	0.42077026232876	0.841698119099089	normal	0.0320782465901635	2.24407646992741	normal	0.9816874847734	-0.0421304
TRINITY_DN11691_c0_g1	LOC120114698	843	32.9	810	25.73	859	38.89	728	15.04	397	17.37	602	17.48	953	26.34	771	28	1917	41.05	542	22.74	625	27.35	597	23.47	607	30.63	855	18.63	502	20.3	837.33	32.51	575.67	16.63	1213.67	31.8	588	24.52	654.67	23.19	0.941900967635559	0.0222738184483241	normal	0.387415529626843	-0.276978	normal	0.137102865132748	-0.511266
TRINITY_DN11704_c0_g1	LOC107948799	395	76.66	508	75.34	262	57.77	1539	153.93	929	220.24	1157	161.85	543	74.44	254	46.14	460	49.76	560	108.33	559	126.05	377	79	396	88.58	627	70.69	339	69.24	388.33	69.92	1208.33	178.67	419	56.78	498.67	104.46	454	76.17	0.381426094040488	-0.293959	normal	0.0627208270925715	0.655908388059056	normal	0.752684631236273	0.115469720726462
TRINITY_DN117074_c0_g1	LOC120155862	334	10.56	220	5.88	185	7.42	168	2.75	51	1.98	149	3.44	270	6.39	265	8.38	278	5.23	41	1.49	133	5.25	47	1.85	101	4.13	281	5.97	362	12.79	246.33	7.95	122.67	2.72	271	6.67	73.67	2.86	248	7.63	0.534851058380717	-0.26262	normal	0.0227689664747897	-1.47342	normal	0.819682702730158	-0.138549
TRINITY_DN11718_c0_g2	LOC120135187	48	2.2	50	1.81	23	1.19	0	0	0	0	0	0	106	3.48	34	1.5	292	7.64	8	0.37	0	0	135	6.68	56	2.89	36	0.99	50	2.45	40.33	1.73	0	0	144	4.21	47.67	2.35	47.33	2.11	0.0872558946658576	1.27540668810616	normal	0.705783190900098	0.54555018170895	normal	0.770496877915386	0.281954571913959
TRINITY_DN11718_c1_g1	LOC120135188	242	11.44	170	6.34	66	3.53	23	0.56	0	0	22	0.75	344	11.66	227	10.3	591	15.96	43	2.07	61	3.38	97	4.96	205	10.91	357	10.16	297	15.03	159.33	7.1	15	0.44	387.33	12.64	67	3.47	286.33	12.03	0.0976304602002872	0.817214864512227	normal	0.162966978898508	-0.959072	normal	0.21061605922556	0.740686369144652
TRINITY_DN11766_c0_g2	LOC120217719	139	37.36	334	68.16	216	69.56	1354	191.91	1024	358.45	1008	200.14	233	43.92	63	15.66	128	19.08	442	117.73	99	31.19	308	90.85	187	58.64	184	28.31	236	68.29	229.67	58.36	1128.67	250.17	141.33	26.22	283	79.92	202.33	51.75	0.0349174444522686	-1.10854	normal	0.308080091634405	0.566596846774595	normal	0.750314897690459	-0.177685
TRINITY_DN11805_c0_g1	LOC120212891	218	6.92	440	10.88	185	6.64	1041	16.85	472	17.19	735	16.58	388	8.84	145	4.43	477	8.5	170	5.52	92	3.43	419	14.09	117	4.17	608	11.67	430	14.64	281	8.15	749.33	16.87	336.67	7.26	227	7.68	385	10.16	0.69238069121013	-0.163829	normal	0.965985485651423	0.0247035278026113	normal	0.606301722217004	0.283904698387472
TRINITY_DN1182_c0_g1	LOC18604593	1295	71.27	2728	118.9	1540	95.5	12532	353.81	4739	302.29	8873	350.65	2619	103.07	2055	107.83	2942	92.66	1737	97.73	1300	85.09	1207	71.97	1176	72.82	4129	136.71	2261	132.82	1854.33	95.22	8714.67	335.58	2538.67	101.19	1414.67	84.93	2522	114.12	0.699556059967488	0.0904215026254298	normal	0.743041512980945	-0.0897811	normal	0.431225600400904	0.247100845077802
TRINITY_DN11823_c0_g1	LOC108474753	239	5.89	775	15.18	190	5.28	210	2.68	38	1.07	153	2.73	443	7.84	232	5.52	637	9.02	161	4.06	481	13.97	603	16.05	170	4.67	586	8.73	249	6.62	401.33	8.78	133.67	2.16	437.33	7.46	415	11.36	335	6.67	0.620111670724258	-0.220536	normal	0.394070828149792	0.478703461765494	normal	0.4665253076679	-0.391209
TRINITY_DN11842_c0_g1	--	4844	272.05	7519	334.85	3712	238.15	20481	584.81	8330	536.1	15113	604	5935	240.6	4493	244.9	9361	302.77	5330	306.7	5276	351.46	5175	318.18	4930	311.87	7610	259.36	4810	292.06	5358.33	281.68	14641.3	574.97	6596.33	262.76	5260.33	325.45	5783.33	287.76	0.598906750204441	-0.108567	normal	0.191447809536848	0.283260320479086	normal	0.900669958922598	0.0272001021189494
TRINITY_DN12040_c0_g2	LOC120122473	641	19.43	563	12.8	540	18.22	346	5.78	168	5.53	267	6.41	688	14.85	502	14.25	873	15.17	490	14.8	456	16.24	537	17.48	914	29.45	894	16.08	349	12.03	581.33	16.82	260.33	5.91	687.67	14.76	494.33	16.17	719	19.19	0.442032420809326	-0.219513	normal	0.998851577305484	-0.000477559	normal	0.671031394729472	0.199500815608495
TRINITY_DN12117_c0_g2	LOC120124515	10	3.3	77	40.51	58	48.64	749	224.66	183	177.97	540	227.92	78	34.96	20	5.54	133	35.61	57	29.11	97	42.21	103	47.83	0	0	118	30.28	58	45.22	48.33	30.82	490.67	210.18	77	25.37	85.67	39.72	58.67	25.17	0.861021487658421	0.156450980931683	normal	0.179044173161792	1.14681818897674	normal	0.963359215065093	-0.0704821
TRINITY_DN12267_c0_g1	LOC120155635	358	10.96	479	11.33	210	6.88	1613	25.23	1049	36.64	1224	26.6	511	11.04	335	9.34	408	7.21	443	14.25	206	7.03	260	8.88	360	11.55	852	15.32	506	16.18	349	9.72	1295.33	29.49	418	9.2	303	10.05	572.67	14.35	0.801163907145427	-0.0876446	normal	0.846422678193321	0.0821940540481395	normal	0.12189112710571	0.572083276479546
TRINITY_DN122682_c0_g1	LOC120127646	274	72.17	542	107.28	121	36.1	192	25.92	46	15.29	138	26.03	210	38.73	121	29.54	284	41.2	209	54.21	276	83.64	353	100.17	231	71.79	277	41.55	30	8.34	312.33	71.85	125.33	22.41	205	36.49	279.33	79.34	179.33	40.56	0.0392394649643378	-0.958519	normal	0.649672394311344	0.226622074574308	normal	0.284222159529004	-0.834421
TRINITY_DN12285_c1_g1	LOC120215387	54	1.85	535	13.37	199	7.28	1887	30.46	560	21.18	1448	32.41	367	6.84	270	7.7	475	8.45	226	7.64	403	13.25	391	12.36	91	3.49	381	6.66	153	5.6	262.67	7.5	1298.33	28.02	370.67	7.66	340	11.08	208.33	5.25	0.731933865779701	0.198226002003275	normal	0.204422834976879	0.789580818731397	normal	0.502724393220079	-0.497827
TRINITY_DN12384_c0_g1	LOC120137209	241	30.96	966	90.42	848	119	6783	436.29	2927	450.07	4724	424.48	1040	86.81	742	82.87	2022	139.82	1058	131.85	657	96.55	862	120.52	441	68.83	1364	98.3	1043	138.99	685	80.13	4811.33	436.95	1268	103.17	859	116.31	949.33	102.04	0.347292503593827	0.412361375790202	normal	0.18831744681176	0.589463284511027	normal	0.57599936243573	0.288914639160002
TRINITY_DN12434_c0_g1	LOC107957202	499	18.79	504	18.41	443	20.86	228	5.16	149	7.47	181	5.83	528	15.82	593	24.69	955	24.73	260	12.59	725	38.55	770	37.43	572	32.46	995	26.62	449	21.81	482	19.35	186	6.15	692	21.75	585	29.52	672	26.96	0.789836786892436	0.0815062321709171	normal	0.223991	0.551788294929323	normal	0.396822441735579	0.292510919430341
TRINITY_DN12434_c0_g2	LOC120133929	308	8.94	1571	36.09	886	29.04	5687	85.16	3094	102.87	3982	83.44	1049	21.85	689	19.24	1649	27.41	1249	37.07	968	32.98	1277	40.07	880	28.66	1645	28.87	757	23.56	921.67	24.69	4254.33	90.49	1129	22.83	1164.67	36.71	1094	27.03	0.802554675187259	-0.105599	normal	0.117679137165899	0.668282598452101	normal	0.770904609713073	0.137442072457379
TRINITY_DN12478_c0_g1	LOC120202611	535	15.44	555	12.59	502	16.36	2419	35.2	1375	44.82	1603	32.68	687	14.23	436	12.02	818	13.35	511	14.74	446	14.21	636	18.98	427	13.64	885	15.33	308	9.53	530.67	14.8	1799	37.57	647	13.2	531	15.98	540	12.83	0.528337305622222	-0.174885	normal	0.463194044152998	0.243277997372886	normal	0.579573153023945	-0.208156
TRINITY_DN12787_c0_g1	LOC120148255	858	37.19	1012	34.86	537	27.56	491	10.93	132	6.44	337	10.6	785	24.15	471	18.94	668	16.22	438	17.97	379	17.68	227	10.91	408	18.47	875	22.26	355	16.7	802.33	33.2	320	9.32	641.33	19.77	348	15.52	546	19.14	0.0125324875930954	-0.707242	normal	0.0107495974451781	-0.921999	normal	0.0257035611316139	-0.735674
TRINITY_DN12794_c0_g1	LOC120132178	34	1.89	55	2.41	22	0.92	245	5.7	76	3.24	147	5.03	75	2	84	4.16	92	1.95	5	0.28	24	1.57	0	0	0	0	45	1.01	31	1.85	37	1.74	156	4.66	83.67	2.7	9.67	0.62	25.33	0.95	0.192869908406259	0.863576826633363	normal	0.305302982515991	-1.56021	normal	0.608681904488526	-0.801111
TRINITY_DN12825_c0_g1	--	145	25.51	195	26.32	70	13.98	998	90.51	552	117.78	724	91.83	186	23.16	235	38.82	206	20.26	246	43.26	124	25.38	209	39.71	87	17.59	476	48.86	382	70.87	136.67	21.94	758	100.04	209	27.41	193	36.12	315	45.77	0.503154907864856	0.327074158480577	normal	0.125909335823702	0.803268077120031	normal	0.106838530518589	1.03980771868923
TRINITY_DN12849_c0_g1	LOC120219565	966	33.86	1129	35.97	754	37.24	1020	15.65	375	12.61	783	17.8	1558	44.57	1257	49.6	1693	38.59	1220	55.36	995	46.4	710	33.18	847	40.27	2568	57.44	1444	63.95	949.67	35.69	726	15.35	1502.67	44.25	975	44.98	1619.67	53.89	0.230633054351766	0.268718593337054	normal	0.305334538093102	0.301899646809178	normal	0.0512187896906818	0.556227403268253
TRINITY_DN12880_c0_g2	LOC120217783	32	1.72	24	1	95	5.7	542	14.92	174	10.74	420	16.18	60	2.29	170	8.68	117	3.58	219	11.91	129	8.05	118	6.81	62	3.71	201	6.42	73	4.19	50.33	2.81	378.67	13.95	115.67	4.85	155.33	8.92	112	4.77	0.358066886147249	0.757794408334025	normal	0.0222982338681518	1.72577958638847	normal	0.42946560426829	0.730538487249513
TRINITY_DN1290_c0_g2	--	385	18.57	641	24.38	727	39.62	432	10.76	145	8.08	257	8.95	711	24.56	447	20.67	1480	40.73	245	12.04	581	32.84	661	34.46	338	18.34	644	18.69	565	29.15	584.33	27.52	278	9.26	879.33	28.65	495.67	26.45	515.67	22.06	0.89964170139228	0.0486100755018735	normal	0.967541045977432	0.019046824719691	normal	0.422539702713982	-0.342148
TRINITY_DN12947_c0_g1	--	549	20.23	909	26.31	539	22.56	4147	78.43	1964	83.02	3029	80.21	878	22.72	627	22	1173	24.5	601	21.83	524	22.75	539	20.74	262	10.58	1044	23.29	451	17.65	665.67	23.03	3046.67	80.55	892.67	23.07	554.67	21.77	585.67	17.17	0.950178908412361	0.0149983449046507	normal	0.918484767024714	0.0295603038965263	normal	0.250850464483576	-0.43329
TRINITY_DN12950_c0_g1	--	1328	230.39	1607	213.98	756	148.9	67	5.99	0	0	53	6.63	1624	199.41	795	129.53	1227	119.04	598	103.74	729	147.14	611	114.48	263	52.41	1277	129.34	1152	210.81	1230.33	197.76	40	4.21	1215.33	149.33	646	121.79	897.33	130.85	0.171990536355209	-0.40174	normal	0.0421935972678566	-0.622795	normal	0.186022130575809	-0.619618
TRINITY_DN13082_c0_g1	--	42	2.02	49	1.87	58	3.18	354	8.84	319	17.82	249	8.7	29	1	46	2.14	66	1.82	75	3.69	50	2.82	74	3.88	61	3.3	55	1.6	47	2.42	49.67	2.36	307.33	11.79	47	1.65	66.33	3.46	54.33	2.44	0.474204117407031	-0.525603	normal	0.390518030997622	0.631986239140794	normal	0.95512173637437	0.0490545409336088
TRINITY_DN13130_c0_g1	LOC120215220	262	10.69	360	10.41	410	19.22	1582	30.13	1394	57.24	1099	29.6	278	7.9	277	10.62	451	9.96	239	9.76	348	15.32	323	14.27	311	15.7	520	12.18	413	16.81	344	13.44	1358.33	38.99	335.33	9.49	303.33	13.12	414.67	14.9	0.184178822243977	-0.495608	normal	0.888509704603225	0.0597218086041657	normal	0.795010186236282	0.11131946095199
TRINITY_DN13132_c0_g1	LOC120217704	1583	48.75	1647	40.68	1278	46.39	556	9.54	256	9.07	443	10.67	2252	47.16	975	29.35	3257	54.61	869	26.54	693	25.13	992	33.2	1346	48.85	1619	29.61	1020	34.99	1502.67	45.27	418.33	9.76	2161.33	43.71	851.33	28.29	1328.33	37.82	0.960277107137923	0.0145795061446243	normal	0.038391918940619	-0.567848	normal	0.357932066731733	-0.277818
TRINITY_DN13153_c0_g1	LOC120135558	481	114.78	1397	226.22	976	210.52	746	66.38	108	50.22	556	65.44	1089	158.42	612	98.62	2114	217.28	547	100.2	977	242.64	1121	217.82	223	87.41	805	96.56	491	123.08	951.33	183.84	470	60.68	1271.67	158.11	881.67	186.89	506.33	102.35	0.87443691745205	-0.0596985	normal	0.615153213368921	0.206118017800957	normal	0.0122617598856935	-1.10981
TRINITY_DN13218_c0_g2	LOC120130671	45	2.17	288	10.74	163	8.83	798	19.73	473	26.09	623	21.57	163	5.54	168	7.7	223	6	294	14.16	194	10.82	222	11.5	225	12.23	310	8.93	125	6.24	165.33	7.25	631.33	22.46	184.67	6.41	236.67	12.16	220	9.13	0.781552915536726	-0.16325	normal	0.157016725456934	0.844506947351997	normal	0.623516739174987	0.346528471265691
TRINITY_DN1325_c0_g1	LOC120113788	212	7.58	216	6.04	204	8.71	1134	21.8	499	21.41	795	21.71	224	5.88	210	7.55	353	7.79	131	5.1	219	9.41	270	10.42	132	5.3	388	8.7	219	9.37	210.67	7.44	809.33	21.64	262.33	7.07	206.67	8.31	246.33	7.79	0.717400310446592	-0.135008	normal	0.640810325545392	0.228007453793435	normal	0.972018034074765	-0.0166335
TRINITY_DN132790_c0_g2	--	58	23.97	28	8.46	123	58.16	27	5.74	0	0	19	5.64	103	29.44	33	12.32	185	41.16	93	37.03	21	9.94	77	34.27	143	70.56	45	10.27	119	50.5	69.67	30.2	15.33	3.79	107	27.64	63.67	27.08	102.33	43.78	0.920452235575679	-0.0798222	normal	0.956952752015785	-0.0489636	normal	0.605881942880922	0.508057563657507
TRINITY_DN1333_c0_g1	LOC120131463	158	30.96	69	10.33	118	26.27	1433	144.69	460	110.17	1164	164.36	86	11.9	69	12.65	73	7.97	206	40.21	2	0.46	30	6.35	125	28.23	162	18.43	161	33.19	115	22.52	1019	139.74	76	10.84	79.33	15.67	149.33	26.62	0.0835379357897486	-1.05921	normal	0.683143994724142	-0.442642	normal	0.747356512640486	0.218967341382959
TRINITY_DN13342_c0_g1	LOC120196011	114	3.98	240	6.32	150	5.67	119	2.45	78	2.88	89	2.35	133	3.28	114	3.8	148	2.9	151	5.42	98	3.97	197	7.13	12	0.76	177	3.92	293	10.52	168	5.32	95.33	2.56	131.67	3.33	148.67	5.51	160.67	5.07	0.105255685674514	-0.714104	normal	0.823113561438687	0.116563827029282	normal	0.85400312219109	-0.169914
TRINITY_DN13370_c0_g1	LOC120207072	1671	50.18	1788	46.15	1193	45.35	1657	28.64	696	24.95	1116	27.4	1428	32.54	956	31.61	2311	44.8	764	25.26	1216	47.49	1140	42.4	932	34.41	1819	33.84	748	24.34	1550.67	47.23	1156.33	27	1565	36.32	1040	38.38	1166.33	30.86	0.0656231530758682	-0.452692	normal	0.340475525601561	-0.292663	normal	0.0312119826623371	-0.597749
TRINITY_DN13478_c1_g1	LOC120167932	1530	62.71	2130	68.36	1394	64.05	1393	29.96	465	22.2	1097	33.09	2412	70.73	1553	60.8	2943	68.55	2081	86.61	1855	88.8	1840	81.23	1459	67.09	2563	63.3	1130	49.39	1684.67	65.04	985	28.42	2302.67	66.69	1925.33	85.55	1717.33	59.93	0.893602530459453	0.0258688300502625	normal	0.032482386011238	0.470542350888748	normal	0.615968100852869	-0.127161
TRINITY_DN13504_c0_g1	LOC120219065	21	0.85	111	3.17	47	2	380	7.51	310	13.58	297	8.3	58	1.55	55	2	40	0.89	43	1.59	18	0.8	12	0.5	0	0	27	0.62	79	3.06	59.67	2.01	329	9.8	51	1.48	24.33	0.96	35.33	1.23	0.559881182362227	-0.458725	normal	0.339057706368554	-0.95809	normal	0.639381006603044	-0.719882
TRINITY_DN136089_c0_g1	LOC120202338	272	151.09	212	83.83	250	159.57	0	0	0	0	0	0	451	171.19	239	117.47	300	87.94	243	127.61	252	159.07	206	123.08	305	206.78	375	111.71	119	66.89	244.67	131.5	0	0	330	125.53	233.67	136.59	266.33	128.46	0.965769255998578	-0.017885	normal	0.733904059777335	0.149711320926566	normal	0.925634873259185	-0.0531326
TRINITY_DN136163_c0_g1	LOC120181592	306	48.73	391	48.02	337	61.02	1605	131.77	945	181.36	1060	121.73	335	37.88	377	56.52	723	64.63	401	64.11	440	81.6	441	75.87	659	120.27	442	41.24	322	54.18	344.67	52.59	1203.33	144.95	478.33	53.01	427.33	73.86	474.33	71.9	0.958210010982401	0.0180167697303343	normal	0.0995864902677222	0.568110451007841	normal	0.374456359792493	0.451465492273466
TRINITY_DN13645_c0_g3	LOC120216691	91	4.32	101	4.23	107	5.86	588	15.24	290	17.85	404	14.75	154	5.49	109	5.33	163	4.68	238	12.42	122	6.54	114	6.25	58	2.76	328	9.8	105	5.98	99.67	4.8	427.33	15.95	142	5.17	158	8.4	163.67	6.18	0.893180136558417	0.064375813958339	normal	0.119988239497846	0.873556371703462	normal	0.624874382686433	0.334849316807146
TRINITY_DN136937_c0_g1	LOC120122734	435	20.64	640	23.34	857	42.83	474	11.07	101	5.43	368	12.21	463	14.82	435	18.73	1544	39.17	493	22.27	807	42.35	1421	69.24	57	2.91	531	14.33	331	15.97	644	28.94	314.33	9.57	814	24.24	907	44.62	306.33	11.07	0.588555849653573	-0.239095	normal	0.113461649309783	0.723319872452642	normal	0.022409157451908	-1.41623
TRINITY_DN13767_c0_g1	LOC120128410	50	1.61	332	9.12	75	2.68	877	15.72	614	25.23	580	14.72	96	2.27	88	2.76	126	2.41	65	3.24	188	6.99	112	4.18	25	0.9	186	3.92	119	5.09	152.33	4.47	690.33	18.56	103.33	2.48	121.67	4.8	110	3.3	0.223019608209411	-0.793571	normal	0.844168833437966	0.145013950504838	normal	0.513228972400143	-0.574086
TRINITY_DN13853_c0_g1	--	38	1.89	23	0.9	2	0.11	1117	28.63	329	18.88	843	30.24	51	1.82	7	0.33	187	5.3	22	1.11	24	1.4	65	3.49	0	0	181	5.41	16	0.85	21	0.97	763	25.92	81.67	2.48	37	2	65.67	2.09	0.252831805331923	1.35222789675931	normal	0.35791002635968	1.12700410341747	normal	0.5547549612663	1.06994519794132
TRINITY_DN13855_c0_g1	LOC105777231	333	15.96	646	22.56	551	25.82	2504	58.34	1241	63.94	1877	60.9	502	15.28	512	20.02	647	16.3	744	32.94	643	33.24	515	23.55	294	12.35	534	13.49	447	20.38	510	21.45	1874	61.06	553.67	17.2	634	29.91	425	15.41	0.415664130067088	-0.271912	normal	0.102868522874813	0.574401796656139	normal	0.335854426973866	-0.390471
TRINITY_DN13926_c0_g1	LOC120115470	1513	76.54	927	36.69	853	63.69	337	11.06	40	3.59	247	12.51	1575	67.32	1539	101.56	2248	69.07	155	10.02	836	87.18	830	65.32	960	73.57	1775	67.04	1249	80.6	1097.67	58.97	208	9.05	1787.33	79.32	607	54.17	1328	73.74	0.418920461933098	0.255872726937953	normal	0.27598179587138	-0.591528	normal	0.787174264314499	0.0951473441942501
TRINITY_DN139333_c0_g2	LOC107929445	167	125.06	229	118.28	131	113.27	140	53.75	11	12.05	101	54.13	309	155.87	102	65.92	207	79.8	205	141.62	189	159.31	90	72.38	115	107.03	354	137.23	189	140.7	175.67	118.87	84	39.98	206	100.53	161.33	124.44	219.33	128.32	0.683267613062099	-0.188434	normal	0.752802110988651	0.162766043601437	normal	0.808755554715044	0.118678063667349
TRINITY_DN13957_c0_g1	LOC120218575	6153	393.1	4377	222.04	2149	157.55	3824	128.08	1845	139.06	2816	132.05	5264	242.13	2467	151.66	4642	168.78	3075	208.56	2175	168.01	2337	164.98	3070	221.71	5619	218.44	2547	175.88	4226.33	257.56	2828.33	133.06	4124.33	187.52	2529	180.52	3745.33	205.34	0.164020080490446	-0.470769	normal	0.154458941113784	-0.48333	normal	0.330035202653322	-0.342765
TRINITY_DN13989_c0_g1	LOC120195774	610	26.73	592	18.67	401	20.29	2007	43.03	1010	48.24	1305	39.42	825	23.79	719	28.12	1307	30.78	503	20.49	435	20.47	580	25.71	638	29.81	918	23.28	848	37.4	534.33	21.9	1440.67	43.56	950.33	27.56	506	22.22	801.33	30.16	0.152987669439592	0.393583771533528	normal	0.579096299891071	0.183192452965164	normal	0.158205344152049	0.492966710264167
TRINITY_DN14026_c0_g1	LOC120209688	220	7.89	371	10.07	67	2.93	1858	33.39	796	30.64	1321	33	178	4.81	157	5.27	268	5.38	112	3.79	139	5.63	250	8.29	196	7.28	215	4.66	139	5.81	219.33	6.96	1325	32.34	201	5.15	167	5.9	183.33	5.92	0.394078403659017	-0.44259	normal	0.990650171299432	-0.00714986	normal	0.729018590995322	-0.223682
TRINITY_DN14071_c0_g1	LOC120198350	496	22.23	304	10.52	111	5.47	1920	42.46	897	44.96	1446	44.81	379	11.8	204	8.5	284	7.41	180	7.91	99	5.61	271	13.33	275	13.58	377	10.05	231	10.62	303.67	12.74	1421	44.08	289	9.24	183.33	8.95	294.33	11.42	0.359569678646928	-0.47181	normal	0.43826335991664	-0.464404	normal	0.804438445986392	-0.145964
TRINITY_DN1408_c0_g1	LOC120117494	97	8.3	501	33.52	252	24.4	1925	84.94	736	73.71	1440	88.9	268	16.37	279	22.75	379	18.39	370	32.09	337	33.73	217	20.06	31	3	631	32.19	182	16.59	283.33	22.07	1367	82.52	308.67	19.17	308	28.63	281.33	17.26	0.698425852066334	-0.191405	normal	0.378483193867375	0.465441752762766	normal	0.649378676222808	-0.371342
TRINITY_DN14164_c0_g1	--	210	10.48	570	21.73	178	9.74	261	6.57	100	5.67	170	6	603	20.91	237	10.99	536	14.81	192	9.47	116	7.22	177	9.76	144	7.85	335	10.21	228	12.39	319.33	13.98	177	6.08	458.67	15.57	161.67	8.82	235.67	10.15	0.680660294247519	0.174139942977707	normal	0.204061141820463	-0.620755	normal	0.319226369506878	-0.504297
TRINITY_DN14164_c1_g1	LOC120204105	268	15.1	232	10.36	174	11.06	82	2.32	31	1.96	64	2.52	463	18.7	240	12.96	512	16.2	20	1.16	70	4.66	116	7.05	300	19.2	457	15.54	369	22.17	224.67	12.17	59	2.27	405	15.95	68.67	4.29	375.33	18.97	0.289420059599825	0.385044064355182	normal	0.0367659455408531	-1.43065	normal	0.150952495958905	0.620409857976515
TRINITY_DN1418_c0_g1	LOC120199004	116	4.81	337	11.34	128	6.11	1032	22.74	427	20.98	709	22.03	274	8.44	225	8.96	292	7.07	219	9.62	203	10.02	250	11.1	186	9.11	398	10.21	215	9.59	193.67	7.42	722.67	21.92	263.67	8.16	224	10.25	266.33	9.64	0.742359018733747	0.142302738152598	normal	0.236731772961795	0.568935902451852	normal	0.474485686930697	0.368336594995662
TRINITY_DN1456_c0_g1	--	4576	52.4	4897	41.68	2052	23.94	4808	14.33	1895	11.38	3503	14.6	4988	35.14	2822	24.74	5970	31.88	2199	22.33	2686	28.05	2118	26.72	2618	22.87	4236	30.29	2561	21.44	3841.67	39.34	3402	13.44	4593.33	30.59	2334.33	25.7	3138.33	24.87	0.56226609380582	-0.158794	normal	0.171024184930631	-0.411366	normal	0.180233037596027	-0.391033
TRINITY_DN14561_c0_g2	LOC107891537	75	4.2	174	7.68	33	2.09	0	0	0	0	0	0	116	4.66	56	3.01	30	0.96	48	2.74	18	1.18	34	2.06	48	3.03	122	4.11	121	7.25	94	4.66	0	0	67.33	2.88	33.33	1.99	97	4.8	0.369390076415697	-0.691917	normal	0.180176963989423	-1.12433	normal	0.966763429184307	0.033377708638821
TRINITY_DN14660_c0_g1	LOC120180659	757	26.24	690	18.67	616	23.96	617	11.89	301	12.23	456	11.83	656	16.21	451	15.86	788	15.19	574	20.43	348	13.89	549	19.46	192	9.45	627	13.5	433	16.31	687.67	22.96	458	11.98	631.67	15.75	490.33	17.93	417.33	13.09	0.03552797183739	-0.578305	normal	0.445900705614242	-0.259547	normal	0.0174211383418885	-0.949818
TRINITY_DN14686_c0_g2	LOC120121293	193	4.86	155	3.09	467	13.28	94	1.22	3	0.09	77	1.4	362	6.54	454	10.99	668	9.64	311	8.01	358	10.6	475	12.94	288	8.15	319	4.87	216	5.83	271.67	7.08	58	0.9	494.67	9.06	381.33	10.52	274.33	6.28	0.536604475358584	0.325855235505544	normal	0.253502719714104	0.631562724963141	normal	0.764562517081518	-0.192851
TRINITY_DN14824_c0_g2	LOC107886937	84	4.73	76	3.37	56	3.61	2580	74.96	937	61.08	2018	82.03	216	8.72	95	5.12	189	6.07	14	0.8	39	2.57	14	0.85	39	2.48	282	9.57	234	14.13	72	3.9	1845	72.69	166.67	6.64	22.33	1.41	185	8.73	0.141038839336357	0.757660773288526	normal	0.1170261191129	-1.40451	normal	0.148422629314816	1.11982836887299
TRINITY_DN14857_c0_g1	LOC120216369	536	26.76	419	16.6	544	31.2	303	7.74	62	3.59	248	8.88	585	21.1	510	24.57	841	24.26	283	14.52	371	22.08	839	45.84	626	35.5	926	27.88	301	16.3	499.67	24.85	204.33	6.74	645.33	23.31	497.67	27.48	617.67	26.56	0.734413418589327	-0.11343	normal	0.65683838094674	0.212644169772077	normal	0.846053228918653	0.0894952116376559
TRINITY_DN1496_c0_g1	LOC105798469	216	8.25	439	15.96	399	18.43	1496	35.04	719	35.85	1190	39.03	564	15.48	497	17.35	610	13.99	477	21.61	373	20.69	380	18.9	244	8.51	700	18.22	426	18.1	351.33	14.21	1135	36.64	557	15.61	410	20.4	456.67	14.94	0.452247992409886	0.270223049232464	normal	0.227105226551055	0.475696244428556	normal	0.71278869063802	0.164184041593438
TRINITY_DN152460_c0_g1	LOC105792376	526	84.79	564	69.86	294	53.83	3003	249.18	2359	457.64	2095	243.15	390	44.52	390	59.11	533	48.06	516	83.26	96	17.99	384	66.74	415	76.71	734	69.22	523	89.04	461.33	69.49	2485.67	316.66	437.67	50.56	332	56	557.33	78.32	0.156366068471972	-0.454532	normal	0.673020371702246	-0.224584	normal	0.655930053172368	0.15900613119655
TRINITY_DN15328_c0_g1	LOC120181890	550	20.77	172	4.95	139	5.61	169	3.23	68	3.23	139	3.71	489	13.29	225	8.15	374	8	81	3.23	99	4.21	110	4.48	349	15.58	476	10.98	254	9.7	287	10.44	125.33	3.39	362.67	9.81	96.67	3.97	359.67	12.09	0.796191031911956	-0.143619	normal	0.0332243946028253	-1.35294	normal	0.804827865535565	0.15664549035141
TRINITY_DN15357_c0_g1	--	19	9.4	112	39.87	167	94.76	18	4.58	9	6.11	18	6.39	60	20.39	18	7.95	117	30.79	71	33.45	48	27.07	53	28.22	0	0	58	15.58	15	7.55	99.33	48.01	15	5.69	65	19.71	57.33	29.58	24.33	7.71	0.153188220194147	-1.22476	normal	0.487622358829134	-0.59358	normal	0.0656011658881625	-2.57619
TRINITY_DN1537_c0_g1	LOC120181730	212	7.58	580	16.1	378	15.52	2276	41.03	1366	54.75	1749	44.32	595	16.29	469	15.57	595	12.41	423	15	397	15.73	305	11.86	197	7.56	633	13.96	149	6.33	390	13.07	1797	46.7	553	14.76	375	14.2	326.33	9.28	0.683832770669322	0.14747347645563	normal	0.550010322348131	0.244471160506867	normal	0.3147217384439	-0.528104
TRINITY_DN15392_c0_g1	LOC120179529	70	1.29	367	5.38	249	5.19	1455	13.86	1183	24.92	992	13.23	152	2.02	209	3.72	288	3.05	83	1.57	35	0.76	77	1.54	200	4.14	248	2.78	110	2.18	228.67	3.95	1210	17.34	216.33	2.93	65	1.29	186	3.03	0.438972556139663	-0.431158	normal	0.0239588009684332	-1.52084	normal	0.587054007751555	-0.367493
TRINITY_DN1551_c0_g1	LOC120179704	401	11.92	1039	24.62	501	17.67	2385	38.29	1067	39.05	1759	39.55	979	21.98	694	19.83	1382	24.11	807	25.72	802	29.43	896	28.43	1126	38.99	949	17.36	568	18.73	647	18.07	1737	38.96	1018.33	21.97	835	27.86	881	25.03	0.363696894157029	0.275295181546986	normal	0.0340236523785636	0.702581481619075	normal	0.296223407669251	0.47409827288655
TRINITY_DN1555_c0_g1	--	1591	70.78	2232	74.19	1372	56.53	11455	266.06	4937	187.09	8080	276.44	2455	64.84	1718	68.91	3365	83.95	1692	67.35	1350	53.81	1603	78.76	985	33.51	2145	51.28	1334	73.35	1731.67	67.17	8157.33	243.2	2512.67	72.57	1548.33	66.64	1488	52.71	0.556492683260341	0.113658894311015	normal	0.600238819081714	0.11962147262586	normal	0.0956537468765524	-0.371003
TRINITY_DN15731_c0_g1	LOC120142195	849	54.61	1542	59.81	730	45.71	6102	191.24	3753	216.65	4444	191.43	1175	45.65	928	41.05	2079	65.56	1359	65.71	736	63.49	957	61.33	562	24.67	1383	44.52	724	41.98	1040.33	53.38	4766.33	199.77	1394	50.75	1017.33	63.51	889.67	37.06	0.954346443318364	0.0150693461901958	normal	0.378107284706876	0.269431547836686	normal	0.194153742680966	-0.375853
TRINITY_DN15841_c0_g1	LOC120210609	35	1.91	78	3.32	26	1.56	352	9.68	193	11.41	259	10.02	52	2.03	39	2.04	70	2.11	52	2.79	59	3.73	105	6.08	0	0	101	3.2	56	3.24	46.33	2.26	268	10.37	53.67	2.06	72	4.2	52.33	2.15	0.853309313521721	-0.13185	normal	0.197304885071319	0.999341078535169	normal	0.949774836441188	-0.09322
TRINITY_DN160_c0_g1	LOC105794531	1134	45.25	1122	36.6	715	30.89	1311	25.77	526	26.69	871	24.41	1150	33.24	752	29.34	1376	33.21	503	22.78	564	28.27	595	24.25	955	41.61	1340	32.59	769	32.94	990.33	37.58	902.67	25.62	1092.67	31.93	554	25.1	1021.33	35.71	0.245804690067811	-0.29069	normal	0.064698140761929	-0.564372	normal	0.821955862419317	-0.0702189
TRINITY_DN160784_c0_g1	LOC120188463	71	2.3	195	4.93	111	3.98	678	11.24	241	8.9	425	9.89	176	4.06	120	3.7	218	4.01	127	4.19	230	8.65	162	5.61	110	4.11	273	5.32	227	7.77	125.67	3.74	448	10.01	171.33	3.92	173	6.15	203.33	5.73	0.893470353198773	0.0635688978479883	normal	0.152117943144712	0.797303577684179	normal	0.323892324970962	0.585521759773599
TRINITY_DN16130_c0_g1	LOC120188904	14	0.69	95	3.69	84	4.68	733	17.39	393	21.9	546	17.98	46	1.39	111	4.46	123	3.36	33	1.77	76	4.26	22	0.98	81	4.81	69	1.82	90	4.47	64.33	3.02	557.33	19.09	93.33	3.07	43.67	2.34	80	3.7	0.814408696895262	0.189799770095033	normal	0.795396012033955	-0.251435	normal	0.739866122320189	0.315181207515605
TRINITY_DN16142_c0_g1	LOC120137651	196	9.6	409	15.86	184	10.04	3619	91.54	2114	118.23	2541	89.69	494	17.15	704	32.78	544	15.26	245	12.32	220	12.26	316	16.51	168	9.54	737	21.47	473	24.72	263	11.83	2758	99.82	580.67	21.73	260.33	13.7	459.33	18.58	0.0274691056145897	0.88239893460464	normal	0.454388681996928	0.315103954615039	normal	0.208709963471036	0.628367337229191
TRINITY_DN1619_c0_g1	LOC120192945	312	14.63	217	8.4	99	5.51	15	0.41	46	2.33	26	0.99	268	8.93	156	7.16	330	8.67	54	2.47	29	1.49	104	5.03	181	9.9	289	8.18	92	4.46	209.33	9.51	29	1.24	251.33	8.25	62.33	3	187.33	7.51	0.701315204193947	-0.182301	normal	0.0293730245884959	-1.48273	normal	0.605561972452088	-0.324484
TRINITY_DN162415_c0_g1	--	48	2.43	122	4.9	80	4.61	411	10.74	286	16.9	264	9.66	152	5.57	38	1.86	196	5.71	167	8.71	147	8.81	196	10.83	84	4.8	147	4.51	37	2.02	83.33	3.98	320.33	12.43	128.67	4.38	170	9.45	89.33	3.78	0.832780188420668	0.134970539848607	normal	0.0154514482961863	1.32780454828219	normal	0.931368902233579	-0.0670169
TRINITY_DN1626_c0_g1	LOC105777876	8997	265.27	6777	161.91	2560	86.58	2351	35.1	872	29.63	1772	37.16	5061	106.38	3221	88.92	6745	118.93	3497	105.82	3383	116.83	2966	94.35	4986	164.04	6608	119.33	3282	106.52	6111.33	171.25	1665	33.96	5009	104.74	3282	105.67	4958.67	129.96	0.0379771031909564	-0.719317	normal	0.0868119280210138	-0.613637	normal	0.31332231022032	-0.397223
TRINITY_DN16346_c0_g1	LOC111282261	415	8.6	367	6.03	207	4.85	302	3.23	150	3.55	187	2.8	389	5.88	161	3.22	486	5.78	131	2.78	140	3.41	291	6.52	277	6.44	250	3.14	135	3	329.67	6.49	213	3.19	345.33	4.96	187.33	4.24	220.67	4.19	0.306012369623841	-0.412666	normal	0.284367069708754	-0.536651	normal	0.2507352498426	-0.624007
TRINITY_DN16346_c1_g1	LOC120179329	72	3.5	331	11.19	225	11.67	157	3.41	51	2.52	102	3.23	376	12.85	194	8.7	305	8.35	202	9.88	317	17.84	255	13.59	90	4.4	313	9.44	92	3.89	209.33	8.79	103.33	3.05	291.67	9.97	258	13.77	165	5.91	0.843463346423072	0.102103961988169	normal	0.259118466397384	0.626590696342948	normal	0.375057861588078	-0.6021
TRINITY_DN1642_c0_g1	LOC111303337	2123	50.33	2007	44.66	1267	39.64	813	10.78	292	8.68	675	12.36	2048	39.6	985	23.22	2266	34.07	1488	48.32	1493	50.16	2256	67.88	779	22.16	2566	36.15	966	27.87	1799	44.88	593.33	10.61	1766.33	32.3	1745.67	55.45	1437	28.73	0.072708073829666	-0.484487	normal	0.44837096014454	0.227547086251091	normal	0.0604713612835992	-0.592481
TRINITY_DN16431_c0_g2	LOC120153072	440	12.97	792	18.48	560	18.65	4015	61.09	2245	75.86	2699	57.47	675	14.29	655	18.58	1056	17.83	861	25.97	542	18.76	924	29.46	633	20.95	1278	22.79	535	16.92	597.33	16.7	2986.33	64.81	795.33	16.9	775.67	24.73	815.33	20.22	0.972904802080259	0.00948506959044473	normal	0.0481123405537936	0.6497949453669	normal	0.413373865887897	0.270052160164521
TRINITY_DN165_c0_g1	--	769	33.21	807	28.61	380	18.85	2271	51.99	1087	54.91	1603	51.62	806	25.33	403	16.8	938	23.23	564	25.24	530	27.83	581	27.58	588	28.71	927	24.47	581	28.01	652	26.89	1653.67	52.84	715.67	21.79	558.33	26.88	698.67	27.06	0.351541453975527	-0.300009	normal	0.840410674671908	0.0678125525201345	normal	0.994233603882729	-0.00254455
TRINITY_DN16514_c0_g2	LOC111275765	540	12.49	406	6.27	449	11.66	128	1.6	59	2.59	72	1.46	892	14.95	412	7.74	987	12.21	271	5.7	277	6.34	322	7.4	454	14.83	500	6.72	635	13.32	465	10.14	86.33	1.88	763.67	11.63	290	6.48	529.67	11.62	0.551468925667929	0.204861644551853	normal	0.237418629408878	-0.460106	normal	0.820561236090755	0.102112233440654
TRINITY_DN16554_c0_g1	--	60	2.49	32	1.05	19	0.89	518	11.1	116	5.54	313	9.38	204	6.07	68	2.71	16	0.38	77	3.26	69	3.36	94	4.22	0	0	67	1.68	14	0.62	37	1.48	315.67	8.67	96	3.05	80	3.61	27	0.77	0.284495976618124	1.01949294660392	normal	0.084560873489028	1.35700448991463	normal	0.538942696725737	-0.992457
TRINITY_DN1660_c0_g1	LOC120129956	2511	103.72	3292	117.28	2047	104.77	2242	46.52	1223	55.66	1520	43.8	3285	96.22	1817	76.09	3739	89.71	1701	73.15	1361	64.23	1681	77.96	2352	109.33	2924	74.88	1829	82.07	2616.67	108.59	1661.67	48.66	2947	87.34	1581	71.78	2368.33	88.76	0.204451452047014	-0.260286	normal	0.0450626312086635	-0.449158	normal	0.397922780668918	-0.22243
TRINITY_DN16641_c1_g2	LOC120126712	50	3.59	247	13.91	217	17.63	1191	44.11	825	68.98	836	43.32	242	12.42	144	9.88	661	26.99	142	10.36	147	12.36	148	11.49	144	11.68	510	21.91	219	16.78	171.33	11.71	950.67	52.14	349	16.43	145.67	11.4	291	16.79	0.416630562943556	0.494308672812004	normal	0.94039818731145	0.0470436251662477	normal	0.451076242846082	0.506388224251867
TRINITY_DN16642_c0_g1	LOC120200257	602	18.38	709	17.16	451	15.54	146	2.31	104	4.16	160	3.55	1418	31.31	481	14.14	1696	30.61	618	19.66	805	28.85	1023	33.77	316	10.82	744	13.75	577	21.26	587.33	17.03	136.67	3.34	1198.33	25.35	815.33	27.43	545.67	15.28	0.109967292485777	0.540288051523519	normal	0.0206006212497213	0.759735164849086	normal	0.461261929627552	-0.255454
TRINITY_DN1671_c0_g1	LOC120182576	415	18.29	499	17.06	398	20.6	1651	37.75	641	34.08	1239	39.65	482	15.77	392	17.62	823	21.47	472	22.31	519	28.76	588	31.74	136	6.57	449	12.68	520	24.77	437.33	18.65	1177	37.16	565.67	18.29	526.33	27.6	368.33	14.67	0.760482990382394	-0.0886978	normal	0.101014970063989	0.530682678094772	normal	0.43994587550523	-0.397595
TRINITY_DN16826_c1_g1	LOC107905200	838	94.26	2532	272.46	1416	182.99	5737	421.04	2766	538.39	4202	426.1	1954	155.71	1594	173.64	2871	189.93	2011	270.7	1851	262.85	2238	298.79	719	140.05	2834	209.68	1250	162.6	1595.33	183.24	4235	461.84	2139.67	173.09	2033.33	277.45	1601	170.78	0.877878575063733	0.0466405145825264	normal	0.0357998044190479	0.673140545682973	normal	0.578239726719751	-0.215853
TRINITY_DN16940_c0_g1	LOC120132525	893	29.42	1776	46.43	1388	51.74	1788	30.36	504	19.17	1295	30.83	1584	37.66	1114	35.34	1765	33.42	486	16.47	1078	41.87	730	26.09	478	17.81	2117	42.26	1021	36.27	1352.33	42.53	1195.67	26.79	1487.67	35.47	764.67	28.14	1205.33	32.11	0.302649770588221	-0.272702	normal	0.170534741599553	-0.523018	normal	0.25557893128803	-0.435148
TRINITY_DN17006_c0_g1	--	485	18.86	592	18.46	291	13.04	1897	38.41	1361	61.55	1312	37.23	530	14.8	479	18.05	753	16.88	525	20.88	533	24.44	327	13.73	312	13.58	892	21.22	346	14.43	456	16.79	1523.33	45.73	587.33	16.58	461.67	19.68	516.67	16.41	0.94423887094064	-0.0206037	normal	0.39485273072944	0.314076527962287	normal	0.921979110122087	-0.0372155
TRINITY_DN17047_c0_g1	LOC105764776	664	214.65	574	138.06	504	185.89	487	81.03	161	66.99	319	74.19	674	152	529	156.71	1069	188.65	335	105.78	411	153.08	351	122.33	250	95.13	876	159.62	265	88.84	580.67	179.53	322.33	74.07	757.33	165.79	365.67	127.06	463.67	114.53	0.757008565892867	-0.0904017	normal	0.233372001936732	-0.420316	normal	0.121451586206708	-0.647785
TRINITY_DN17134_c0_g1	LOC120215913	28	1.42	97	3.88	128	7.35	1201	31.47	659	38.66	735	26.95	68	2.47	39	1.9	193	5.59	19	0.98	24	1.43	46	2.53	0	0	145	4.43	135	7.33	84.33	4.22	865	32.36	100	3.32	29.67	1.65	93.33	3.92	0.646446981710518	-0.347137	normal	0.157100386654241	-1.27326	normal	0.908714641311339	-0.159234
TRINITY_DN171628_c0_g1	--	0	0	40	1.74	6	0.37	411	10.91	78	4.61	210	7.83	39	1.48	43	2.27	102	3.16	91	5.11	78	5	60	3.56	85	5.28	49	1.62	63	3.71	15.33	0.7	233	7.78	61.33	2.3	76.33	4.56	65.67	3.54	0.1654335438984	1.76792517782209	normal	0.0191358866719511	2.81253800643053	normal	0.109587758728356	2.37131026765091
TRINITY_DN17190_c1_g1	LOC107899890	298	13.98	598	22.12	462	24.49	1761	42.62	1172	63.41	1213	41.08	426	14.32	350	15.75	567	15.19	639	30.57	458	25.19	433	21.96	122	6.44	460	12.99	207	10.39	452.67	20.2	1382	49.04	447.67	15.09	510	25.91	263	9.94	0.185872739686492	-0.426723	normal	0.221993365310182	0.438072361583612	normal	0.0229018439023232	-1.04115
TRINITY_DN17332_c0_g1	LOC120122613	727	40.56	711	31.22	337	21.26	178	5.12	30	1.94	155	6.24	725	28.96	178	9.51	612	19.47	433	24.61	385	25.18	434	26.18	498	31.32	910	30.5	452	26.96	591.67	31.01	121	4.43	505	19.31	417.33	25.32	620	29.59	0.107700743321361	-0.693511	normal	0.545968597264599	-0.217962	normal	0.83819452524323	-0.0761319
TRINITY_DN17402_c0_g1	LOC111275987	71	3.2	189	6.87	140	7.62	1746	41.14	694	38.83	1287	43.18	265	9.43	143	6.5	597	15.42	155	8.24	162	9.69	123	6.87	250	15.36	291	9.16	101	5.32	133.33	5.9	1242.33	41.05	335	10.45	146.67	8.27	214	9.95	0.10795391583292	0.821654972333847	normal	0.436530977336673	0.4273778241761	normal	0.361899951982126	0.591285192695749
TRINITY_DN17465_c0_g1	LOC108483071	269	22.76	269	17.8	166	15.9	1788	78.04	1067	105.66	1322	80.73	471	28.45	268	21.62	525	25.25	97	8.32	139	13.76	121	11.07	264	25.3	248	12.56	136	12.26	234.67	18.82	1392.33	88.14	421.33	25.11	119	11.05	216	16.71	0.233954597526071	0.407583965081669	normal	0.150768930718409	-0.696717	normal	0.752450449943981	-0.171401
TRINITY_DN17465_c0_g2	LOC120160264	0	0	40	3.2	29	3.38	3013	159.79	1422	172.33	2144	159.08	148	10.85	154	15.05	85	4.94	31	3.22	23	2.76	55	6.11	15	1.75	157	9.59	56	6.12	23	2.19	2193	163.73	129	10.28	36.33	4.03	76	5.82	0.0326354505363181	2.23819428245824	normal	0.479869368126197	0.979891273519982	normal	0.354541006747123	1.39304718895643
TRINITY_DN17465_c1_g1	LOC120198612	247	11.71	82	3.06	27	1.45	46	1.13	24	1.31	32	1.1	208	7.07	114	5.18	133	3.6	53	2.56	42	2.33	30	1.54	49	2.61	130	3.71	69	3.5	118.67	5.41	34	1.18	151.67	5.28	41.67	2.14	82.67	3.27	0.93133086167897	-0.0636941	normal	0.142603701320652	-1.28199	normal	0.406926316592049	-0.754113
TRINITY_DN17560_c0_g1	LOC120218152	668	93.49	529	50.37	437	37.28	512	37.72	191	31.89	404	43.67	561	58.35	429	26.16	955	90.78	316	41.42	266	52.5	304	55.46	647	71.92	814	43.76	428	21.72	544.67	60.38	369	37.76	648.33	58.43	295.33	49.79	629.67	45.8	0.467377743262048	-0.232441	normal	0.0757340903481746	-0.645332	normal	0.841122737950388	0.0796983180216123
TRINITY_DN17606_c0_g1	LOC105789060	3940	107.72	6636	145.35	4812	147.26	5424	78.14	2152	68.72	3813	77.05	4756	95.24	3089	82.31	5985	94.97	4919	143.99	4430	145.34	7165	219.38	2915	91.75	7406	124.22	4108	124.87	5129.33	133.44	3796.33	74.64	4610	90.84	5504.67	169.57	4809.67	113.61	0.00416417137594123	-0.584768	normal	0.151489496800548	0.380919395736389	normal	0.208944793700404	-0.283916
TRINITY_DN17606_c0_g2	--	2914	226.1	3602	217.12	2454	212.54	2398	92.47	807	70.59	1736	93.91	3425	187.86	2259	165.63	3972	173.17	2072	162.99	1637	147.63	2522	209.55	1582	136.07	4301	196.52	2268	186.57	2990	218.59	1647	85.66	3218.67	175.55	2077	173.39	2717	173.05	0.0815864529574759	-0.318109	normal	0.298829278496522	-0.256426	normal	0.119370898876337	-0.346078
TRINITY_DN17625_c0_g1	LOC120134606	263	5.4	555	9.69	303	6.71	1569	16.43	570	13.12	1085	16.05	463	6.55	447	9.48	714	8.78	516	10.69	458	11.02	589	12.46	428	11.51	715	9.02	379	8.51	373.67	7.27	1074.67	15.2	541.33	8.27	521	11.39	507.33	9.68	0.60650181059042	0.162609378099057	normal	0.0220156113722714	0.791255520381062	normal	0.369527736277914	0.337011731674531
TRINITY_DN1776_c0_g1	LOC105792313	604	14.37	496	7.93	277	8	215	2.67	127	4.31	161	2.8	434	8.57	278	5.96	433	6.02	296	7.87	267	6.7	241	7.16	205	6.12	453	6.46	499	14.22	459	10.1	167.67	3.26	381.67	6.85	268	7.24	385.67	8.93	0.0561682182034908	-0.680684	normal	0.203970672135957	-0.51074	normal	0.451444779472216	-0.364632
TRINITY_DN177923_c0_g2	LOC120179203	40	35.51	31	18.61	94	96.63	0	0	0	0	0	0	34	20.16	40	30.18	91	40.97	100	80.72	90	89.43	63	60.02	89	99.14	64	28.78	13	11.35	55	50.25	0	0	55	30.44	84.33	76.72	55.33	46.42	0.463292524699642	-0.595081	normal	0.343391683415962	0.750095451417341	normal	0.888428189645974	-0.154037
TRINITY_DN17804_c0_g1	LOC120126722	178	10.63	693	32.38	426	28.71	6753	206.77	2493	171.63	4876	208.88	514	21.89	515	29.37	621	21.08	941	57.01	503	35.05	753	48.48	125	8.41	1057	37.78	326	20.76	432.33	23.91	4707.33	195.76	550	24.11	732.33	46.85	502.67	22.32	0.969290367479304	0.0161449697483864	normal	0.014489653130585	1.06273879421691	normal	0.847607205222104	-0.11902
TRINITY_DN18073_c0_g1	LOC120165346	2855	97	3003	80.95	1554	58.68	1481	24.92	583	22.67	1049	24.58	3270	79.24	2534	81.02	4849	92.26	1644	55.96	1562	59.65	1958	70.39	2684	100.42	4425	88.18	2326	85.01	2470.67	78.88	1037.67	24.06	3551	84.17	1721.33	62	3145	91.2	0.669606977379366	0.102543127886778	normal	0.392544489290524	-0.234448	normal	0.408213215401742	0.221689415028294
TRINITY_DN183191_c0_g1	LOC120147068	280	13.28	427	15.97	539	28.9	281	6.88	172	9.42	210	7.19	634	21.55	297	13.52	1004	27.2	408	19.74	455	25.31	786	40.32	116	6.2	790	22.56	389	19.75	415.33	19.38	221	7.83	645	20.76	549.67	28.46	431.67	16.17	0.833923452173195	0.0857323632041199	normal	0.149903556781012	0.631473520982246	normal	0.597226588592425	-0.300531
TRINITY_DN18373_c0_g1	LOC120122902	156	80.98	193	71.78	131	78.05	125	33.34	28	20.11	87	32.41	179	63.68	164	75.71	74	20.36	125	61.59	55	32.51	135	75.4	63	39.65	200	56.08	115	60.62	160	76.94	80	28.62	139	53.25	105	56.5	126	52.12	0.37522420368358	-0.49279	normal	0.533450364039042	-0.350992	normal	0.31563157939287	-0.558864
TRINITY_DN18436_c0_g1	LOC120192504	1752	57.92	6525	170.16	8034	301.52	951	16.56	236	9.33	749	18.46	4101	96.84	3100	99.7	8304	156.84	5867	198.65	10001	390.77	13446	481.6	2755	100.56	8249	164.37	4006	142.06	5437	176.53	645.33	14.78	5168.33	117.79	9771.33	357.01	5003.33	135.66	0.175640571084937	-0.59292	normal	0.0179805109078691	1.09481551014589	normal	0.396545431997739	-0.39323
TRINITY_DN18453_c0_g1	LOC107914577	122	4.54	66	1.94	46	1.93	498	9.56	211	9.02	311	8.36	141	3.76	152	5.43	168	3.58	39	1.48	33	1.44	93	3.74	90	3.76	168	3.77	147	5.86	78	2.8	340	8.98	153.67	4.26	55	2.22	135	4.46	0.319610372898465	0.578084672323824	normal	0.745563501378382	-0.263339	normal	0.367803720157296	0.642287697263377
TRINITY_DN18471_c0_g1	LOC120124477	785	28.24	938	25.29	529	19.6	3611	62.74	1098	44.39	2635	63.4	795	20.04	516	16.6	1137	23.21	1109	39.58	709	29.82	548	20.72	343	12.57	928	19.81	556	20.34	750.67	24.38	2448	56.84	816	19.95	788.67	30.04	609	17.57	0.225862928136413	-0.316181	normal	0.306859951128096	0.340432605559941	normal	0.134898808419214	-0.481922
TRINITY_DN18498_c0_g1	LOC120137536	396	15.81	57	1.93	87	3.78	26	0.58	0	0	31	0.96	140	4.27	272	10.95	268	6.51	22	0.96	97	4.88	100	4.64	157	7.51	253	6.54	222	10.19	180	7.17	19	0.51	226.67	7.24	73	3.49	210.67	8.08	0.881987754563527	-0.106912	normal	0.207106740096257	-1.09578	normal	0.967488681998677	0.0328806470920156
TRINITY_DN1858_c0_g2	LOC120152043	1786	104.18	2139	99.22	995	65.79	1732	52.69	790	53.99	1277	54.37	1929	81.27	1511	84.9	2974	99.8	1847	110.9	1399	96.59	1277	81.4	795	52.88	2092	73.96	1272	80.17	1640	89.73	1266.33	53.68	2138	88.66	1507.67	96.3	1386.33	69	0.911896539082564	-0.027617	normal	0.546635530779875	0.169508998860956	normal	0.170375295942527	-0.404063
TRINITY_DN18606_c0_g1	LOC107924204	83	4.22	25	0.9	83	4.08	871	21.26	267	14.52	599	20.56	143	4.71	170	7.42	330	8.26	30	1.56	15	0.89	95	4.68	59	3.04	166	5.02	104	5.67	63.67	3.07	579	18.78	214.33	6.8	46.67	2.38	109.67	4.58	0.0716446124744847	1.17999579473634	normal	0.751298390182042	-0.31166	normal	0.59140714203256	0.457082115083093
TRINITY_DN186691_c0_g1	--	184	58.6	299	73.83	270	101.25	131	22.16	30	13.4	91	21.32	107	24.48	166	49.71	258	44.93	325	102.44	246	94.05	519	184.42	63	23.33	252	46.45	131	42.91	251	77.89	84	18.96	177	39.71	363.33	126.97	148.67	37.56	0.0388505344466612	-0.928486	normal	0.0748529863972601	0.787456985297004	normal	0.0609047399380651	-1.02318
TRINITY_DN18745_c0_g1	LOC111276303	301	8.26	106	2.28	104	3.2	24	0.34	15	0.5	16	0.31	189	3.63	116	2.99	149	2.32	90	2.5	47	1.51	196	5.77	216	6.59	245	4.03	17	0.53	170.33	4.58	18.33	0.38	151.33	2.98	111	3.26	159.33	3.72	0.2793226081936	-0.628361	normal	0.564377915251075	-0.416774	normal	0.753613647397896	-0.290816
TRINITY_DN18799_c0_g1	--	126	8.93	126	7.01	18	1.44	2093	76.55	1324	109.27	1476	75.53	148	7.5	105	7.11	227	9.15	235	16.93	131	10.87	81	6.21	0	0	283	12.01	130	9.84	90	5.79	1631	87.12	160	7.92	149	11.34	137.67	7.28	0.504229518774438	0.448445430332795	normal	0.162823488609952	1.04188473496175	normal	0.833052683252447	0.292539318156327
TRINITY_DN18884_c0_g1	LOC120192354	7	0.38	56	2.34	22	1.36	422	11.69	210	12.98	343	13.3	29	1.1	82	4.17	134	4.07	21	1.16	13	0.8	43	2.54	2	0.12	86	2.82	0	0	28.33	1.36	325	12.66	81.67	3.11	25.67	1.5	29.33	0.98	0.179201746993664	1.22591269113372	normal	0.837711807888064	0.241070382471461	normal	0.795856250161739	-0.495759
TRINITY_DN18949_c0_g1	LOC120173127	490	20.49	447	15.42	261	12.86	389	8.35	152	8.07	243	7.24	337	11.73	260	11.12	645	16.66	282	14.27	162	8.85	223	10.57	105	5.37	432	12.16	155	6.99	399.33	16.26	261.33	7.89	414	13.17	222.33	11.23	230.67	8.17	0.249334490523886	-0.4154	normal	0.15584497134113	-0.589016	normal	0.0260244024139144	-1.0852
TRINITY_DN18985_c0_g1	LOC110424591	678	38.27	1061	47.11	734	46.92	557	16.43	248	16.59	457	18.88	1010	40.85	594	32.1	1312	42.33	492	28.48	493	32.71	489	29.89	595	37.92	1625	55.11	620	37.48	824.33	44.1	420.67	17.3	972	38.43	491.33	30.36	946.67	43.5	0.410302510465796	-0.204916	normal	0.105496986007745	-0.465367	normal	0.917250658107082	-0.0319039
TRINITY_DN1904_c0_g1	LOC108484223	115	5.09	339	11.07	203	10.93	931	20.79	558	30.02	803	24.42	153	4.48	205	7.82	351	8.81	182	8.75	313	13.89	314	15.14	33	2.17	206	4.44	226	10.44	219	9.03	764	25.08	236.33	7.04	269.67	12.59	155	5.68	0.565677833898483	-0.268905	normal	0.201818727794925	0.632169912361744	normal	0.393146122845067	-0.634263
TRINITY_DN19064_c0_g1	LOC105791712	662	25.16	874	24.09	585	25.74	2812	54.52	1277	55.93	1885	50.77	876	24.02	708	26.44	1515	31.57	876	34.53	700	30.1	800	31.75	683	28.14	1365	29.24	672	28.45	707	25	1991.33	53.74	1033	27.34	792	32.13	906.67	28.61	0.682820574449404	0.102728047251335	normal	0.10399172745683	0.435048105075212	normal	0.48319225723179	0.188995089932904
TRINITY_DN19176_c1_g2	LOC120213131	532	13.7	482	9.83	381	11.08	191	2.6	52	1.57	128	2.43	846	15.67	457	11.34	1214	17.99	212	5.59	108	3.34	290	8.1	508	15.01	898	14.1	683	18.86	465	11.54	123.67	2.2	839	15	203.33	5.68	696.33	15.99	0.249984188144469	0.358330622361392	normal	0.035382316071554	-0.954786	normal	0.20066617016844	0.437409953419924
TRINITY_DN19291_c0_g1	--	298	30.29	1388	126.87	738	104.23	6194	329.86	2460	319.79	4594	341.31	837	67.97	742	66.44	1067	58.25	849	95.38	637	83.03	830	96.97	287	36.19	917	58.72	502	59.72	808	87.13	4416	330.32	882	64.22	772	91.79	568.67	51.54	0.611781877188997	-0.205235	normal	0.526608323927893	0.268722602498091	normal	0.176417516256402	-0.664578
TRINITY_DN19330_c0_g1	LOC105797241	230	133	228	86.01	196	131.13	820	251.9	404	237.04	595	248.98	382	161.15	216	102.33	375	114.34	189	120.81	294	212.55	341	221.13	132	121.68	455	125.72	227	108.67	218	116.71	606.33	245.97	324.33	125.94	274.67	184.83	271.33	118.69	0.727669021006686	0.12427831559577	normal	0.184560570334342	0.594249066001132	normal	0.916091337008967	0.0502651259138187
TRINITY_DN1939_c0_g1	LOC120196113	744	30.18	1104	34.46	608	27.74	4062	81.57	1754	79.29	2854	80.01	859	24.36	702	27.82	1176	27.36	684	27.88	306	15.11	722	31.54	821	36.32	1105	26.78	648	28.98	818.67	30.79	2890	80.29	912.33	26.51	570.67	24.84	858	30.69	0.304416677405872	-0.237008	normal	0.514188853030582	-0.239483	normal	0.969226721389932	-0.0119423
TRINITY_DN19390_c0_g1	LOC120148088	832	37.34	995	35.24	551	27.98	868	20.15	305	15.82	624	20.29	1259	40.55	678	29.24	1030	26.42	487	22.35	530	27.89	555	26.88	831	41.98	1436	38.81	764	36.63	792.67	33.52	599	18.75	989	32.07	524	25.71	1010.33	39.14	0.785952744449313	-0.0751506	normal	0.312696082077129	-0.305587	normal	0.444323004266242	0.218029307575524
TRINITY_DN19496_c0_g1	LOC120209145	245	9.55	212	7.43	45	2.28	113	2.67	32	1.76	84	2.79	188	5.74	120	4.69	258	6.29	166	7.17	99	4.93	113	5.59	147	7.97	144	3.83	143	6.4	167.33	6.42	76.33	2.41	188.67	5.57	126	5.9	144.67	6.07	0.691800504648378	-0.230049	normal	0.866236876254242	-0.109593	normal	0.787546029690444	-0.196061
TRINITY_DN19540_c0_g1	LOC120153488	166	9.57	142	6.46	90	5.85	75	2.24	26	1.74	45	1.88	169	6.98	47	2.6	167	5.5	86	5.06	96	6.51	104	6.5	0	0	117	4.06	47	2.9	132.67	7.29	48.67	1.95	127.67	5.03	95.33	6.02	54.67	2.32	0.321305177066978	-0.55024	normal	0.711524643402583	-0.209158	normal	0.170459815656236	-1.69965
TRINITY_DN19567_c0_g3	LOC120142868	407	52.99	316	31.87	141	20.81	0	0	0	0	0	0	325	30.08	198	24.39	229	16.79	147	19.27	0	0	33	4.64	478	71	522	40.1	491	67.77	288	35.22	0	0	250.67	23.75	60	7.97	497	59.62	0.208704343930905	-0.575838	normal	0.227783237745458	-2.06501	normal	0.13407654867373	0.746767035165873
TRINITY_DN19968_c0_g1	LOC120123748	193	9.52	345	13.41	180	10.04	921	23.44	440	25.06	625	22.26	288	10.18	175	8.28	362	10.19	235	11.82	220	12.72	220	11.73	165	9.16	508	15.08	98	5.17	239.33	10.99	662	23.59	275	9.55	225	12.09	257	9.8	0.562728237155691	-0.204459	normal	0.587564321667288	0.219913709155355	normal	0.767628066502884	-0.165877
TRINITY_DN2000_c1_g1	LOC120198686	661	78.06	1082	95.63	1338	149.2	985	71.29	467	84.48	680	71.36	1309	112.21	1048	119.75	1625	102.13	583	70.12	567	74.2	931	99.43	607	71.15	1529	101.41	685	80.57	1027	107.63	710.67	75.71	1327.33	111.36	693.67	81.25	940.33	84.38	0.78369550007289	-0.0903002	normal	0.383627176203083	-0.340316	normal	0.308837893915248	-0.392968
TRINITY_DN2017_c0_g1	LOC120125590	428	21.15	664	25.83	380	21.22	86	2.2	38	2.17	88	3.16	760	26.84	778	36.87	1025	28.91	407	20.4	548	31.63	648	34.56	473	26.25	1053	31.29	545	28.82	490.67	22.73	70.67	2.51	854.33	30.87	534.33	28.86	690.33	28.79	0.10342120749224	0.435923802636522	normal	0.213308302283503	0.430335038368002	normal	0.272338491491902	0.331312066634368
TRINITY_DN2021_c0_g1	LOC120194868	90	2.24	224	4.38	207	5.78	1217	15.5	435	12.28	908	16.18	222	3.94	216	5.7	235	3.4	196	5.36	209	6.07	150	4.01	94	2.62	285	4.81	241	6.41	173.67	4.13	853.33	14.65	224.33	4.35	185	5.15	206.67	4.61	0.986214719526625	-0.00824778	normal	0.499026704583086	0.355222473091076	normal	0.909413438312998	0.0702653701153474
TRINITY_DN202653_c0_g1	--	108	5.84	33	1.4	36	2.26	20	0.57	0	0	0	0	72	2.79	20	1.06	106	3.26	13	0.71	18	1.14	6	0.35	126	7.88	30	1	59	3.5	59	3.17	6.67	0.19	66	2.37	12.33	0.73	71.67	4.13	0.596183193971064	-0.43723	normal	0.0532497510009784	-2.05295	normal	0.735852474281262	0.353331030748532
TRINITY_DN2035_c0_g2	--	379	10.38	778	16.61	806	25.55	6985	96.68	3794	114.7	4476	84.94	956	18.58	899	23.33	1427	23.28	597	15.39	369	10.29	513	16.22	528	15.5	1559	24.7	763	24.14	654.33	17.51	5085	98.77	1094	21.73	493	13.97	950	21.45	0.378984904717591	0.302259667939139	normal	0.656248865517041	-0.175472	normal	0.485635657559818	0.283024307122761
TRINITY_DN2060_c0_g1	LOC120169147	165	12.08	845	47.13	507	35.31	7835	417.57	3338	386.61	5809	425.26	887	47.83	992	82.2	1128	43.94	377	30.66	224	25.43	430	33.23	121	12.81	1645	78.49	744	62.89	505.67	31.51	5660.67	409.81	1002.33	57.99	343.67	29.77	836.67	51.4	0.129493831224061	0.674032506607101	normal	0.63851660375676	-0.239063	normal	0.532779927156277	0.42639488921633
TRINITY_DN2068_c0_g1	LOC120213835	486	21.07	459	16.35	223	10.87	1996	44.16	881	44.6	1400	43.27	633	19.5	249	10.71	669	16.94	322	13.63	262	13.29	263	12.73	452	20.97	685	18.71	326	14.7	389.33	16.1	1425.67	44.01	517	15.72	282.33	13.22	487.67	18.13	0.907029341475717	-0.0450489	normal	0.645005080299443	-0.185282	normal	0.633215921106836	0.203495024260153
TRINITY_DN207076_c0_g1	LOC120156806	42	21.8	187	69.55	29	17.28	27	7.2	14	10.05	13	4.84	46	16.37	42	19.39	157	43.2	30	14.78	110	65.01	112	62.56	44	27.69	152	42.62	7	3.69	86	36.21	18	7.36	81.67	26.32	84	47.45	67.67	24.67	0.591774059950367	-0.419674	normal	0.600518271321072	0.445736922942026	normal	0.619953880973533	-0.55259
TRINITY_DN2076_c0_g1	LOC120151650	292	16.35	296	12.75	352	21.44	1670	47.78	551	34.89	1097	43.77	725	28.3	293	15.54	838	26.14	464	26.69	424	28.18	318	19.5	211	12.47	662	21.61	315	18.38	313.33	16.85	1106	42.15	618.67	23.33	402	24.79	396	17.49	0.229748021079699	0.454013286174115	normal	0.143810494338186	0.575236662634163	normal	0.910964456107604	0.049393030722938
TRINITY_DN2118_c0_g1	--	221	9.1	236	7.26	194	9.32	998	23.94	395	20.4	638	21.55	436	13.5	194	7.46	562	13.91	221	9.79	234	10.46	260	11.33	215	5.75	318	8.2	211	10.55	217	8.56	677	21.96	397.33	11.62	238.33	10.53	248	8.17	0.317648691295076	0.376350562986797	normal	0.341549737152873	0.391211044240548	normal	0.88940822898345	0.0617215847443867
TRINITY_DN2125_c0_g1	LOC120142047	1132	33.58	2693	62.58	3486	118.38	2044	29.75	697	21.35	1588	32.14	1843	39.04	1161	33.08	2865	47.73	2555	75.33	2746	92.63	4690	153.83	718	25.62	3079	53.63	1545	49.26	2437	71.51	1443	27.75	1956.33	39.95	3330.33	107.26	1780.67	42.84	0.0306362239655735	-0.834008	normal	0.0998163932425774	0.678559275451705	normal	0.0921946163425628	-0.769446
TRINITY_DN2150_c0_g1	LOC108476234	375	11.32	495	11.75	462	15.76	382	5.83	235	8.48	303	6.37	640	13.51	462	13.27	722	12.27	361	10.87	297	10.6	434	13.97	312	10.38	517	9.28	285	9.46	444	12.94	306.67	6.89	608	13.02	364	11.81	371.33	9.71	0.952871576063789	0.0171150707410076	normal	0.907453698098382	-0.0420444	normal	0.258241045791751	-0.423325
TRINITY_DN2154_c0_g1	--	603	26.29	542	19.17	355	18.03	281	7.4	210	12.4	241	8.83	445	14.9	318	13.75	841	20.97	382	18.02	394	20.45	363	17.77	211	10.18	503	13.52	477	22.33	500	21.16	244	9.54	534.67	16.54	379.67	18.75	397	15.34	0.255124048039473	-0.386321	normal	0.706090297920647	-0.132926	normal	0.273081938312699	-0.475198
TRINITY_DN2154_c1_g1	--	630	29.52	851	32.32	467	24.71	2267	57.12	838	46.29	1506	52.99	701	24.42	484	22.35	905	24.71	693	33.98	336	18.29	355	18.11	398	21.09	616	17.59	591	30.32	649.33	28.85	1537	52.13	696.67	23.83	461.33	23.46	535	23	0.215305963084709	-0.308555	normal	0.539008960841393	-0.223603	normal	0.319584339847744	-0.347653
TRINITY_DN21582_c0_g1	LOC120158350	216	10.51	380	14.48	197	10.94	13	0.32	0	0	17	0.59	348	12.06	295	13.66	633	17.63	317	15.84	360	20.54	682	35.97	148	8.19	278	8.01	231	11.9	264.33	11.98	10	0.3	425.33	14.45	453	24.12	219	9.37	0.417683863845602	0.27449418500148	normal	0.0108528714101142	1.09560880109233	normal	0.429074777446952	-0.357866
TRINITY_DN2167_c0_g1	LOC120205796	143	8.64	278	13.21	183	14.3	4479	150.68	1374	98.16	3446	162.47	147	5.45	75	4.61	384	12.78	180	11.37	180	12.45	223	12.3	144	8.03	277	9.18	179	11.97	201.33	12.05	3099.67	137.1	202	7.61	194.33	12.04	200	9.73	0.314605530474298	-0.518907	normal	0.586502134112291	0.243309395949477	normal	0.770624561700608	-0.13893
TRINITY_DN2178_c0_g1	LOC120183791	80	3.55	353	11.8	206	11.1	2052	52.35	1106	63.18	1369	49.06	185	5.46	278	10.41	310	7.6	407	19.92	215	10.08	487	23.83	194	6.27	318	8.22	305	14.29	213	8.82	1509	54.86	257.67	7.82	369.67	17.94	272.33	9.59	0.951287768503263	-0.0319764	normal	0.0358342486886697	1.1115099761354	normal	0.601521850534943	0.310836031016257
TRINITY_DN21981_c0_g1	LOC120199692	177	6.97	102	3.17	111	4.94	31	0.63	0	0	25	0.71	246	6.95	105	3.97	134	3.02	96	3.86	0	0	100	4.26	63	2.79	123	2.92	49	2.07	130	5.03	18.67	0.45	161.67	4.65	65.33	2.71	78.33	2.59	0.798042148674511	-0.140403	normal	0.460743942036052	-0.819703	normal	0.152606431648929	-0.973155
TRINITY_DN21989_c0_g2	LOC114173347	370	66.22	572	78.49	290	58.94	1581	145.86	519	112.79	1196	154.32	496	62.8	382	64.15	785	78.5	362	64.73	438	91.17	373	72.1	169	34.78	815	85.05	377	71.13	410.67	67.88	1098.67	137.66	554.33	68.48	391	76	453.67	63.65	0.936057079400539	0.0233253074192836	normal	0.486058008270109	0.241939720414557	normal	0.81745407102542	-0.104696
TRINITY_DN2206_c0_g1	--	794	40.22	1547	61.23	740	40.7	29575	709.67	13762	734.53	21445	722	1922	68.27	1589	75.97	2229	63.13	2162	108.35	838	50.22	1164	61.82	937	52.07	3052	90.51	1407	74.3	1027	47.38	21594	722.07	1913.33	69.12	1388	73.46	1798.67	72.29	0.0221631317132062	0.549649303356392	normal	0.0388782381729862	0.727090223695615	normal	0.0467354674851086	0.613755030998214
TRINITY_DN2214_c0_g1	--	1299	47.64	1305	37.83	1487	61.63	1137	21.52	329	13.87	944	25	1931	50.81	1730	60.99	2755	57.8	805	30.17	2431	104.64	2030	80.51	1096	45.18	2748	60.84	1549	60.88	1363.67	49.03	803.33	20.13	2138.67	56.53	1755.33	71.77	1797.67	55.63	0.479995950536739	0.186355496314231	normal	0.134891812876435	0.616663305457042	normal	0.600211421961693	0.155997597877165
TRINITY_DN22232_c0_g2	LOC120150246	113	26.58	133	23.7	136	36.39	677	82.04	306	89.38	504	85.4	148	24.49	67	14.65	158	20.58	219	51.01	84	23.06	105	26.83	42	11.46	244	33.02	145	35.73	127.33	28.89	495.67	85.61	124.33	19.91	136	33.63	143.67	26.74	0.285008378321524	-0.524116	normal	0.604292871236443	0.300399436085078	normal	0.854645394938927	-0.125447
TRINITY_DN22412_c0_g2	LOC120175940	3273	151.19	2389	87.08	1272	66.39	1342	32.03	425	22.61	1041	34.76	4017	133.02	2621	116.17	4539	119.69	661	31.14	1613	87.31	955	47.65	1897	98.75	3633	101.18	1954	96.56	2311.33	101.55	936	29.8	3725.67	122.96	1076.33	55.37	2494.67	98.83	0.398993301602721	0.259286471561472	normal	0.0499653855342387	-0.810445	normal	0.868866238052658	-0.0555501
TRINITY_DN2244_c1_g1	LOC120217709	68	2.04	235	5.58	24	0.86	1650	25.66	682	23.42	1149	25.11	342	7.35	199	5.84	289	4.97	95	2.92	163	5.75	293	9.49	115	3.88	136	2.47	187	6.02	109	2.83	1160.33	24.73	276.67	6.05	183.67	6.05	146	4.12	0.0755862966082507	1.11857572227062	normal	0.0990136099061919	1.22238352337876	normal	0.497776876901735	0.564732900643943
TRINITY_DN2274_c0_g1	--	413	10.45	554	11.52	462	12.04	3060	31.53	1447	32.13	2274	32.23	596	7.91	460	10.76	982	12.87	659	14.53	559	12.07	414	9.28	197	6.22	684	8.11	409	9.71	476.33	11.34	2260.33	31.96	679.33	10.51	544	11.96	430	8.01	0.861714256156729	0.0496669822105063	normal	0.184609640770412	0.443231201828646	normal	0.341871858325678	-0.38317
TRINITY_DN2279_c0_g1	--	78	3.83	180	6.97	93	5.16	61	1.55	12	0.68	28	1	77	2.56	81	3.81	152	4.05	61	3.04	78	4.49	103	5.47	148	8.15	147	4.34	79	4.14	117	5.32	33.67	1.08	103.33	3.47	80.67	4.33	124.67	5.54	0.279276628200438	-0.563415	normal	0.739513673305608	-0.20551	normal	0.907753171683599	0.0766737628565024
TRINITY_DN2279_c0_g3	LOC120153294	234	10.8	558	20.32	290	15.28	209	4.97	43	2.16	126	4.2	467	15.46	369	16.5	473	12.36	148	7.12	233	12.83	278	13.36	170	8.37	412	11.47	346	16.99	360.67	15.47	126	3.78	436.33	14.77	219.67	11.1	309.33	12.28	0.851461451109499	-0.0639407	normal	0.406008353265688	-0.377923	normal	0.484573588297016	-0.321669
TRINITY_DN228_c0_g1	LOC120118539	1065	29.26	1993	41.92	2916	92.33	430	5.93	106	3.19	342	6.55	2462	49.6	1587	43.1	4961	76.95	1349	38.9	2366	75.66	3573	108.88	1403	41.1	3245	53	1742	50.74	1991.33	54.5	292.67	5.22	3003.33	56.55	2429.33	74.48	2130	48.28	0.939044615613674	0.030259554812105	normal	0.247762591843646	0.510162327973494	normal	0.693728556577515	-0.159388
TRINITY_DN2281_c0_g1	LOC120118632	790	37.51	957	38.63	705	37.74	2754	69.79	1783	103.4	1828	64.29	1059	37.93	748	35.19	1051	29.4	695	32.89	538	31.24	484	24.9	1168	62.85	1540	45.46	924	49.56	817.33	37.96	2121.67	79.16	952.67	34.17	572.33	29.68	1210.67	52.62	0.435678376431362	-0.18529	normal	0.375290139243958	-0.257052	normal	0.121826119730504	0.459720498516255
TRINITY_DN22884_c0_g1	LOC107933377	59	3.05	66	2.94	15	0.88	461	12.44	195	11.67	313	11.69	66	2.49	68	3.37	114	3.48	56	2.96	57	3.69	104	5.91	0	0	80	2.48	42	2.33	46.67	2.29	323	11.93	82.67	3.11	72.33	4.19	40.67	1.6	0.51784200910113	0.466878561825024	normal	0.23640588856797	0.969558654926345	normal	0.74328619153695	-0.49823
TRINITY_DN23178_c0_g1	LOC107961893	52	8.92	61	8.04	90	17.53	1463	129.39	431	89.52	1196	147.94	150	18.22	93	14.99	241	23.13	160	27.46	43	8.58	30	5.56	120	23.64	94	9.42	200	36.2	67.67	11.5	1030	122.28	161.33	18.78	77.67	13.87	138	23.09	0.205592848692954	0.71534804751027	normal	0.675425020662409	0.350395270983446	normal	0.207281984089797	0.982521972401099
TRINITY_DN23503_c0_g1	--	39	30.54	25	13.18	22	19.47	0	0	0	0	0	0.49	54	27.84	10	6.6	92	36.34	27	19.05	52	44.81	53	43.68	79	75.34	75	29.93	53	41.01	28.67	21.06	0	0.16	52	23.59	44	35.85	69	48.76	0.782182494944414	0.257965865736409	normal	0.348383867350366	0.869114174156171	normal	0.194730595109991	1.18434436517512
TRINITY_DN24036_c0_g1	LOC110429332	387	60.48	300	37.48	246	39.17	2885	222.08	1357	249.78	2037	221.01	557	63.02	372	54.97	350	29.17	256	43.98	122	17.37	173	30.93	137	26.95	597	50.47	321	60.29	311	45.71	2093	230.96	426.33	49.05	183.67	30.76	351.67	45.9	0.872179032330703	0.0637960711946025	normal	0.24205804272093	-0.539878	normal	0.830374152630813	-0.106481
TRINITY_DN2409_c0_g1	LOC120190076	1936	44.1	2857	50.49	2091	52.11	21681	248.97	7528	192.68	15964	256.15	2975	49.01	3264	69.45	6505	83.58	1032	23.73	4487	115.38	2005	47.62	635	16.46	4126	56.19	2054	49.16	2294.67	48.9	15057.7	232.6	4248	67.35	2508	62.24	2271.67	40.6	0.0776670382589969	0.447379883655989	normal	0.316855736291888	0.442305299618683	normal	0.439677820928505	-0.312512
TRINITY_DN2410_c0_g1	--	569	14.95	1051	23.58	876	27.97	5487	78.96	2342	73.08	3688	74.45	1807	32.22	1141	33.15	2287	34.62	724	19.45	1072	33.21	1237	37.73	906	30	1628	26.12	1314	42.7	832	22.17	3839	75.5	1745	33.33	1011	30.13	1282.67	32.94	0.0217840380255626	0.622637905179397	normal	0.106971883045816	0.561376179319081	normal	0.128649645528279	0.496862395822351
TRINITY_DN2441_c1_g3	--	1449	79.42	685	29.88	1151	72.17	325	9.55	120	7.32	217	8.91	2087	82.03	1760	93.08	3063	95.8	453	25.91	847	55.59	1354	82.99	1351	85.06	2808	93.61	1592	92.91	1095	60.49	220.67	8.59	2303.33	90.3	884.67	54.83	1917	90.53	0.120276324309803	0.556489169949637	normal	0.816353167034345	-0.109203	normal	0.164072280215421	0.549054411829142
TRINITY_DN245_c0_g1	LOC120188984	548	9.69	506	6.61	238	4.57	315	2.52	114	2.24	213	2.4	541	6.36	509	8.09	637	6.05	228	3.85	119	2.3	133	2.52	151	2.84	422	4.18	405	7.5	430.67	6.96	214	2.39	562.33	6.83	160	2.89	326	4.84	0.965601581034271	0.0151929362736106	normal	0.011034519633878	-1.16426	normal	0.287397694246702	-0.533402
TRINITY_DN2474_c1_g2	LOC120204723	406	42.59	563	46	661	78.54	643	34.79	196	24.25	408	30.89	693	51.8	357	35.58	905	53.69	406	43.05	560	68.65	396	44.9	366	43.62	792	49.32	507	56.55	543.33	55.71	415.67	29.98	651.67	47.02	454	52.2	555	49.83	0.476708303949062	-0.249739	normal	0.952643887062097	-0.0232095	normal	0.644715771390232	-0.179984
TRINITY_DN2476_c0_g1	LOC120133980	3874	365.32	3126	202.7	2239	228.83	2212	84.54	924	70.85	1618	86.79	3728	226.14	1981	157.35	5032	227.59	3219	252.19	2629	283.74	3822	331.17	2318	231.77	3838	197.19	2120	185.71	3079.67	265.62	1584.67	80.73	3580.33	203.69	3223.33	289.03	2758.67	204.89	0.32655291550263	-0.268872	normal	0.266703151491528	0.314588381236825	normal	0.253454839926848	-0.316285
TRINITY_DN2476_c1_g1	LOC120156806	186	47.73	273	52.84	277	80.92	185	24.45	65	20.89	125	23.1	336	60.53	264	62.75	428	60.59	206	52.17	447	132.71	336	93.02	76	22.71	699	102.67	249	66.76	245.33	60.5	125	22.81	342.67	61.29	329.67	92.63	341.33	64.05	0.920192612713137	0.0363572450418074	normal	0.141791215856466	0.691210548599119	normal	0.901438719976246	0.0778922654918301
TRINITY_DN2509_c0_g1	LOC120135340	870	34.88	739	23.5	686	31.85	5870	133.77	2421	123.26	4238	134.15	1047	30.74	981	38.71	1389	33.57	570	22.34	744	34.11	665	28.24	247	10.56	1616	41.56	804	35.73	765	30.08	4176.33	130.39	1139	34.34	659.67	28.23	889	29.28	0.613215542738805	0.139589283358398	normal	0.926287555895046	0.0304505619661376	normal	0.80281141503557	-0.117497
TRINITY_DN25680_c1_g1	--	107	74.99	305	148.53	97	78.41	45	16.18	0	0	36	18.07	129	61.11	120	73	170	61.68	83	53.96	114	90.13	68	51.27	72	62.45	184	67.31	57	39.88	169.67	100.64	27	11.42	139.67	65.26	88.33	65.12	104.33	56.55	0.241506730128695	-0.577999	normal	0.355590994540746	-0.55814	normal	0.198755097031017	-0.845736
TRINITY_DN25879_c1_g1	LOC120180677	210	25.88	257	24.57	121	16.9	2220	337.07	1057	231.9	1608	326.37	101	8.85	240	28.01	318	22.1	240	35.02	160	23.01	240	66.94	192	26.96	362	26.36	133	17.39	196	22.45	1628.33	298.45	219.67	19.65	213.33	41.66	229	23.57	0.711340223384185	-0.188631	normal	0.359932657613914	0.413055441088641	normal	0.89430937764464	0.0672739702935803
TRINITY_DN26555_c0_g1	LOC120200612	88	7.92	516	30	182	16.49	3408	146.26	1817	180.14	2374	141.48	248	13.44	149	9.84	336	13.68	294	26.57	111	11.95	196	16.22	119	12.64	458	20.8	220	19.85	262	18.14	2533	155.96	244.33	12.32	200.33	18.25	265.67	17.76	0.411859935782048	-0.433683	normal	0.971669346633898	-0.0213425	normal	0.851634002991756	-0.120081
TRINITY_DN2662_c0_g1	LOC120173312	1306	57.98	2250	77.37	1347	71.3	10191	248.52	3385	180.14	7437	253.41	2287	73.26	2211	93.83	2957	74.69	2245	104.71	1553	85.88	2370	120.17	820	41.51	3623	97.95	1782	87.54	1634.33	68.88	7004.33	227.36	2485	80.59	2056	103.59	2075	75.67	0.279864904530562	0.238776964228602	normal	0.0163275215436743	0.620209966177654	normal	0.767254710393227	0.10022772068475
TRINITY_DN2681_c0_g1	--	840	59.67	1434	90.79	784	64.12	5780	218.79	3483	305.53	4254	221.67	1474	84.84	847	58.13	1113	43.06	1602	113.67	749	60.56	1213	104.77	1027	111.81	2032	93.62	1117	114.71	1019.33	71.53	4505.67	248.66	1144.67	62.01	1188	93	1392	106.71	0.470797125117026	-0.195339	normal	0.107367651453085	0.50484460785774	normal	0.203448686820481	0.316624578602373
TRINITY_DN2681_c1_g1	LOC105792376	3713	258.05	4100	226.88	2712	206.62	20639	699.67	12108	887.23	14363	674.6	4544	207.31	2731	180.76	5203	184.59	3516	229.22	1952	143.35	2865	200.79	3900	302.93	4894	196.33	2961	218.51	3508.33	230.52	15703.3	753.83	4159.33	190.89	2777.67	191.12	3918.33	239.26	0.345841462219961	-0.190002	normal	0.750672559355225	-0.0823505	normal	0.800211689782718	0.0663941714776423
TRINITY_DN27086_c0_g2	--	265	13.26	255	10.26	223	12.35	233	5.76	90	5.14	212	7.39	461	15.98	214	10.44	532	15.42	162	8.27	211	12.1	138	7.7	414	23.07	485	14.14	207	11.62	247.67	11.96	178.33	6.1	402.33	13.95	170.33	9.36	368.67	16.28	0.560472624765817	0.211388111621881	normal	0.526006727922119	-0.288162	normal	0.358306120374221	0.447922663451502
TRINITY_DN2720_c0_g1	LOC120189039	326	8.09	399	7.77	170	4.65	1107	13.94	588	16.52	825	14.54	515	9.01	247	5.7	602	8.67	276	6.89	446	13.07	166	4.5	258	7.38	486	7.23	223	5.94	298.33	6.84	840	15	454.67	7.79	296	8.15	322.33	6.85	0.615370425723146	0.183690101504251	normal	0.527011513347083	0.310386508630891	normal	0.956434026951247	-0.0238157
TRINITY_DN2728_c0_g1	LOC120137013	1336	36.06	1467	28.29	1465	44.63	699	10.34	420	14.37	491	10.56	1867	35.52	1497	35.96	3285	50.35	1096	27.2	1821	57.41	3213	88.22	1535	42.42	2391	38.19	1057	33.49	1422.67	36.33	536.67	11.76	2216.33	40.61	2043.33	57.61	1661	38.03	0.561587898441155	0.150471042134225	normal	0.0455070343772145	0.774811974869052	normal	0.888987488954147	0.0431083036825535
TRINITY_DN2740_c0_g2	LOC120176192	1680	52.17	3352	85.32	3035	104.07	1833	30.83	644	20.2	1293	31.42	3740	79.47	2544	71.36	5077	89.74	2944	98.02	4026	151.02	4333	152.79	1574	67.14	3765	66.41	2368	72.71	2689	80.52	1256.67	27.48	3787	80.19	3767.67	133.94	2569	68.75	0.882708767083356	0.0406114469937907	normal	0.0160512257085287	0.757447805209207	normal	0.40635900047622	-0.256992
TRINITY_DN2740_c1_g1	LOC120181592	805	55.47	1237	78.63	1037	91.9	3966	145.2	2184	200.9	2695	137.58	1498	78.57	924	62.45	1613	68.39	941	82.13	792	76.28	1176	98	1064	97.79	1278	57.56	841	65.8	1026.33	75.33	2948.33	161.23	1345	69.8	969.67	85.47	1061	73.72	0.854762296073724	-0.0453672	normal	0.550521915885665	0.177570211951139	normal	0.889227700040899	-0.0456492
TRINITY_DN27512_c0_g1	LOC120118901	36	2.03	97	4.17	44	2.76	506	14.25	764	48.29	312	12.34	113	4.45	116	6.12	97	3.04	5	0.28	11	0.71	6	0.37	77	4.83	306	10.24	146	8.62	59	2.99	527.33	24.96	108.67	4.54	7.33	0.45	176.33	7.9	0.321267944776603	0.608920776228301	normal	0.0120982769526651	-2.64754	normal	0.0439547622017658	1.38359009105973
TRINITY_DN2776_c0_g2	--	100	3.87	176	5.59	95	4.35	36	0.76	0	0	23	0.68	156	4.58	53	2.05	75	1.76	12	0.5	55	2.64	19	0.84	32	1.47	126	2.93	144	6.31	123.67	4.6	19.67	0.48	94.67	2.8	28.67	1.33	100.67	3.57	0.185152695060557	-0.75878	normal	0.0305356217177234	-1.76125	normal	0.579139967611206	-0.41106
TRINITY_DN2777_c0_g1	LOC120129694	584	21.33	974	26.95	445	17.11	2569	46.78	1025	37.11	1713	44.43	934	23.23	774	27.1	1016	22.54	701	27.49	809	35.36	586	23.71	420	21.72	988	22.14	681	25.29	667.67	21.8	1769	42.77	908	24.29	698.67	28.85	696.33	23.05	0.70861816002017	0.0994322709187812	normal	0.220700446973219	0.388284156488674	normal	0.857964096686007	-0.0590673
TRINITY_DN2806_c0_g1	--	520	27.42	261	10.9	197	11.36	33	0.92	0	0	23	0.9	245	9.46	212	9.89	284	8.53	9	0.5	72	4.38	168	9.34	286	15.56	469	14.8	216	11.86	326	16.56	18.67	0.61	247	9.29	83	4.74	323.67	14.07	0.0676760672585784	-0.834072	normal	0.0335145969953824	-1.71211	normal	0.708425280668053	-0.198497
TRINITY_DN2810_c0_g1	LOC120161279	345	8.13	560	10.28	436	13.19	1625	19.39	877	23.06	1203	20.11	649	10.96	380	8.58	931	12.61	264	6.33	386	10.63	343	8.6	311	8.13	822	11.69	288	8.82	447	10.53	1235	20.85	653.33	10.72	331	8.52	473.67	9.55	0.784698904525875	0.0830047315674128	normal	0.688480404673733	-0.150937	normal	0.679390920766866	-0.160371
TRINITY_DN28119_c0_g1	LOC110413799	204	11.77	125	5.7	31	2.02	1553	46.47	643	43.33	1134	47.48	210	8.68	145	8.04	164	5.4	351	20.71	139	9.44	344	21.5	71	4.61	149	5.16	84	5.17	120	6.5	1110	45.76	173	7.37	278	17.22	101.33	4.98	0.799374738449268	0.163861694057214	normal	0.024311126108144	1.47574361600278	normal	0.620953544422992	-0.397206
TRINITY_DN2829_c0_g2	LOC120150884	125	5.34	139	4.69	101	4.88	115	2.54	53	2.61	65	2.01	186	5.7	52	2.13	110	2.69	74	3.23	166	8.32	22	1.02	52	2.5	104	2.68	16	0.73	121.67	4.97	77.67	2.39	116	3.51	87.33	4.19	57.33	1.97	0.35384270862952	-0.516674	normal	0.806086135206378	-0.188597	normal	0.0925508285838363	-1.33196
TRINITY_DN28356_c0_g1	LOC120212286	0	0	45	1	30	0.95	375	5.42	270	8.67	243	4.92	9	0.18	29	0.78	37	0.59	64	1.83	118	3.88	170	5.15	0	0	21	0.36	62	1.86	25	0.65	296	6.34	25	0.52	117.33	3.62	27.67	0.74	0.82584395342674	-0.313504	normal	0.0170267725675869	2.58291224494755	normal	0.94584789452576	0.145516960490302
TRINITY_DN2854_c0_g1	LOC107909938	169	8.79	506	20.94	391	22.85	1978	52.6	1359	81.06	1332	49.27	278	10.46	293	14.33	510	14.97	175	9.43	285	17.28	160	8.86	131	7.65	246	7.6	183	9.81	355.33	17.53	1556.33	60.98	360.33	13.25	206.67	11.86	186.67	8.35	0.358468051485827	-0.389645	normal	0.340981499304032	-0.480174	normal	0.0441642205582135	-1.05044
TRINITY_DN29089_c0_g2	--	625	12.11	1739	26.73	1194	26.43	913	9.3	493	11.56	648	9.23	1788	24.9	951	17.76	2807	31.2	675	13.4	639	14.54	1395	29.38	1007	21.87	1348	15.83	825	17.16	1186	21.76	684.67	10.03	1848.67	24.62	903	19.11	1060	18.29	0.591798412287601	0.18248097473508	normal	0.825405450324106	-0.0902789	normal	0.525342570798311	-0.239903
TRINITY_DN291_c0_g1	--	888	43.35	1205	44.5	570	32.31	951	25.35	308	18.85	586	21.61	1217	43.74	665	30.39	1603	46.44	485	24.51	351	21.61	486	25.35	252	14.53	1021	30.35	347	16.15	887.67	40.05	615	21.94	1161.67	40.19	440.67	23.82	540	20.34	0.887958075431878	-0.0381859	normal	0.0233334538715423	-0.712067	normal	0.0116328260316523	-0.982182
TRINITY_DN2913_c0_g1	LOC120204173	89	3.21	439	12.6	315	12.85	77	1.43	109	4.51	53	1.38	281	7.24	246	8.56	590	12.17	379	13.98	196	8.3	599	23.37	79	3.21	298	6.5	119	4.6	281	9.55	79.67	2.44	372.33	9.32	391.33	15.22	165.33	4.77	0.958827807954494	-0.0265621	normal	0.175699983898101	0.774217797717481	normal	0.124214661787897	-1.01045
TRINITY_DN2957_c0_g1	LOC120141773	1628	60.95	1725	56.09	809	32.45	1599	33.01	651	28.24	1044	30.93	1363	36.33	1044	36.18	2211	47.49	713	27.68	774	30.79	713	26.09	1247	50.94	1595	37.86	1337	56.74	1387.33	49.83	1098	30.73	1539.33	40	733.33	28.19	1393	48.51	0.321576399582713	-0.276273	normal	0.0433438354133388	-0.623504	normal	0.884313658264115	-0.0478342
TRINITY_DN297_c0_g2	--	1358	28	1034	15.65	983	22.21	1100	10.36	503	12.32	834	10.97	1204	18.81	787	14.87	1809	21.35	744	16.23	820	23.15	1039	19.89	829	15.7	1051	12.86	979	25.28	1125	21.95	812.33	11.22	1266.67	18.34	867.67	19.76	953	17.95	0.257205220105209	-0.327463	normal	0.668471185844914	-0.139501	normal	0.320942373194914	-0.348564
TRINITY_DN3006_c0_g1	LOC120208389	392	21.17	685	29.07	400	24.47	2695	75.16	1403	87.76	1948	76.01	674	26.08	437	22.62	855	26.36	331	18.12	145	9.13	132	7.7	541	32.88	904	29.36	564	32.53	492.33	24.9	2015.33	79.64	655.33	25.02	202.67	11.65	669.67	31.59	0.991729107162982	0.00278441397383841	normal	0.0225019704786091	-1.0103	normal	0.283057991274283	0.338115562003817
TRINITY_DN3014_c0_g1	LOC111317202	1555	67.05	1450	50.96	867	39.4	1351	29.06	757	37.21	985	29.95	1582	49.36	1005	38.57	1587	39.72	955	41.82	753	35.12	619	30.42	1134	59.01	1571	38.24	1039	48.53	1290.67	52.47	1031	32.07	1391.33	42.55	775.67	35.79	1248	48.59	0.246416354399396	-0.306038	normal	0.126701865319556	-0.472759	normal	0.627175371347745	-0.150428
TRINITY_DN3049_c0_g1	--	697	19.26	824	17.91	383	11.24	165	2.28	109	3.33	125	2.23	672	13.32	418	10.01	780	11.17	850	24.47	479	15.92	510	15.36	474	14.31	806	12.62	453	11.93	634.67	16.14	133	2.61	623.33	11.5	613	18.58	577.67	12.95	0.141272118756498	-0.429917	normal	0.512140148337125	0.23045049664822	normal	0.466500666285112	-0.249556
TRINITY_DN30622_c0_g1	LOC105789060	2202	210.46	2338	177.22	1652	180.73	1223	67.1	458	55.82	918	70.49	2051	139.16	1402	129.6	2131	117.86	1083	108.11	713	83.75	1419	147.64	1313	141.52	2291	136.46	1114	107.84	2064	189.47	866.33	64.47	1861.33	128.87	1071.67	113.17	1572.67	128.61	0.00802304249899431	-0.565774	normal	0.0238010878372003	-0.688494	normal	0.0259328047527182	-0.555455
TRINITY_DN30874_c0_g1	LOC120134983	118	6.04	112	4.88	77	4.82	0	0	13	0.83	0	0	93	3.39	44	2.34	197	6.02	89	4.74	43	2.57	90	4.95	26	1.62	76	2.53	58	3.44	102.33	5.25	4.33	0.28	111.33	3.92	74	4.09	53.33	2.53	0.477289406214248	-0.413412	normal	0.730864554992425	-0.221631	normal	0.124529918563586	-1.1254
TRINITY_DN30874_c0_g2	LOC107951278	214	11.73	274	12.08	327	20.37	110	3.12	117	7.81	71	2.8	364	14.54	156	8.22	232	7.42	228	13.04	190	12.72	256	15.88	283	18.1	493	16.62	396	23.37	271.67	14.73	99.33	4.58	250.67	10.06	224.67	13.88	390.67	19.36	0.191988647097037	-0.575721	normal	0.903333197689699	-0.0536757	normal	0.427067258474944	0.356478390497473
TRINITY_DN310_c0_g1	LOC18614090	199	7.78	310	9.63	494	21.97	1934	38.99	869	39.15	1367	38.61	538	15.16	451	17	876	19.77	384	15.27	538	24.78	472	19.98	260	11.44	793	18.75	519	21.72	334.33	13.13	1390	38.92	621.67	17.31	464.67	20.01	524	17.3	0.375248898730931	0.380101547138329	normal	0.14517172378629	0.682127020790523	normal	0.478093990764728	0.371153637335723
TRINITY_DN3125_c0_g1	--	126	5.63	191	6.56	72	3.67	696	15.84	315	16.22	513	16.42	154	4.93	166	7.12	225	5.74	85	3.87	134	7.02	169	8.16	72	3.62	249	6.7	213	10.19	129.67	5.29	508	16.16	181.67	5.93	129.33	6.35	178	6.84	0.745901465509306	0.149150794649481	normal	0.558781697574149	0.338011717315893	normal	0.597056737064642	0.33511190825816
TRINITY_DN31573_c0_g2	LOC120161408	307	17.49	972	43.57	555	35.75	286	8.41	205	13.53	246	10.12	486	19.82	416	22.7	662	21.5	572	33.19	335	22.37	392	24.15	519	33.34	461	15.77	327	19.92	611.33	32.27	245.67	10.69	521.33	21.34	433	26.57	435.67	23.01	0.0992620375912098	-0.592618	normal	0.636963933172715	-0.191466	normal	0.331640794932997	-0.474625
TRINITY_DN3168_c0_g1	--	838	45.96	1518	76.16	775	61.44	4893	134.6	2321	178.48	3669	136.95	1058	33.22	659	50.25	1267	35.22	1330	63.79	999	123.15	1552	95.18	817	40.72	1364	42.63	758	39.09	1043.67	61.19	3627.67	150.01	994.67	39.56	1293.67	94.04	979.67	40.81	0.0559236500706669	-0.463406	normal	0.029778746553327	0.61797131553664	normal	0.496436689478187	-0.191345
TRINITY_DN3176_c0_g1	LOC120134707	550	30.35	321	14.03	324	20.53	2209	64.09	971	63.2	1596	64.7	483	19.21	267	14.36	609	19.28	410	23.58	263	17.03	257	15.38	313	20.21	437	14.8	283	17.04	398.33	21.64	1592	64	453	17.62	310	18.66	344.33	17.35	0.405658204729961	-0.321435	normal	0.715898342833345	-0.158201	normal	0.427137765541472	-0.366151
TRINITY_DN3176_c1_g1	LOC120141596	495	17	984	25.35	358	13.26	2426	43.08	1234	46.02	1818	45.5	626	14.37	452	12.79	995	16.25	424	11.59	512	17.46	554	22.09	242	7.85	638	12.02	576	20.36	612.33	18.54	1826	44.87	691	14.47	496.67	17.05	485.33	13.41	0.520287055872603	-0.204034	normal	0.888134249701075	0.0507124614989452	normal	0.34447411351608	-0.411341
TRINITY_DN3183_c0_g1	LOC120134546	494	18.87	433	10.56	356	14.51	384	6.03	188	6.44	307	6.76	247	6.13	308	10.09	429	8.14	274	9.64	182	8.26	141	4.32	387	14.62	310	6.7	135	3.98	427.67	14.65	293	6.41	328	8.12	199	7.41	277.33	8.43	0.0229754170341675	-0.803125	normal	0.0366630768280205	-0.873589	normal	0.214368188502946	-0.682316
TRINITY_DN3195_c0_g1	--	1401	38.89	1605	35.07	1133	35.61	1288	19.61	448	13.91	954	20.58	2191	42.32	1579	41.75	2764	43.23	766	21.51	923	31.06	655	20	984	31.31	1768	29.19	864	26.53	1379.67	36.52	896.67	18.03	2178	42.43	781.33	24.19	1205.33	29.01	0.252559327120189	0.229191013236125	normal	0.0522179165584183	-0.547669	normal	0.155963416906341	-0.359402
TRINITY_DN3216_c0_g1	--	2437	59.12	2647	49.11	1423	41.16	2900	34.51	1165	29.96	1885	31.63	2756	46.95	1964	45.66	3177	43.18	1479	37.21	1560	41	1680	44.18	1479	38.68	2409	35.51	1599	41.42	2169	49.8	1983.33	32.03	2632.33	45.26	1573	40.8	1829	38.54	0.589410092487585	-0.122558	normal	0.50826902554147	-0.175156	normal	0.170788687223439	-0.355688
TRINITY_DN3222_c1_g1	--	1832	61.22	1470	37.62	1108	42.96	1527	25.86	720	27.55	1042	24.45	1660	39.62	1439	45.88	2870	54.34	972	32.08	1017	38.13	1254	46.18	2200	84.95	2309	46.26	990	35.31	1470	47.27	1096.33	25.95	1989.67	46.61	1081	38.8	1833	55.51	0.919730809132377	-0.027708	normal	0.530149658276367	-0.191624	normal	0.582545317977435	0.217911154072167
TRINITY_DN3230_c0_g1	LOC120133363	183	8.84	404	15.39	240	13.11	264	6.58	118	6.58	195	6.8	405	14.02	223	10.34	508	14.02	210	10.35	181	10.26	184	9.61	33	1.8	433	12.59	203	10.5	275.67	12.45	192.33	6.65	378.67	12.79	191.67	10.07	223	8.3	0.914132769238642	0.0387806811843564	normal	0.602514482294717	-0.221636	normal	0.382918418265842	-0.616199
TRINITY_DN3230_c0_g2	LOC120133363	239	69.66	99	21.61	53	17.61	44	6.6	1	0.37	18	3.78	114	23.25	96	25.77	51	8.16	34	9.73	67	22.55	46	14.46	39	13.31	79	13.07	15	4.55	130.33	36.29	21	3.58	87	19.06	49	15.58	44.33	10.31	0.194357611019151	-0.924338	normal	0.136628980579542	-1.15523	normal	0.0429580762248645	-1.81898
TRINITY_DN3236_c0_g1	--	136	7.54	159	6.96	166	10.37	793	22.61	236	15.04	627	25.02	193	7.62	74	3.9	89	2.81	67	3.79	40	2.6	9	0.54	190	11.88	398	13.22	202	11.92	153.67	8.29	552	20.89	118.67	4.78	38.67	2.31	263.33	12.34	0.13710264797974	-0.805505	normal	0.0209916544491887	-1.78299	normal	0.243314161264365	0.560580312183625
TRINITY_DN32492_c0_g1	--	212	6.46	270	5.87	124	4.2	95	1.23	71	2.03	31	0.61	292	5.29	270	6.81	134	2.13	140	3.93	157	5.06	66	1.96	265	8.16	327	5.41	245	8.56	202	5.51	65.67	1.29	232	4.74	121	3.65	279	7.38	0.900657416097292	-0.063761	normal	0.429822712623431	-0.43387	normal	0.376851267825724	0.419325566127257
TRINITY_DN3276_c0_g3	LOC120116422	287	11.45	354	11.15	214	9.65	1850	38.07	717	32.3	1284	36.98	327	9.35	340	12.77	542	12.36	360	14.66	209	9.78	293	12.64	145	6.5	402	9.48	330	14.1	285	10.75	1283.67	35.78	403	11.49	287.33	12.36	292.33	10.03	0.763010413386976	0.0978988459857391	normal	0.474618823836862	0.279422123729687	normal	0.799703896788393	-0.11647
TRINITY_DN32836_c0_g1	LOC120198096	96	5.53	313	14.19	80	5.19	3669	109.5	2134	143.02	2771	115.7	258	10.58	78	4.27	302	9.89	116	6.82	36	2.43	100	6.23	65	4.25	293	10.1	65	3.98	163	8.3	2858	122.74	212.67	8.25	84	5.16	141	6.11	0.984149562981261	0.0112581736358772	normal	0.395020583577846	-0.584025	normal	0.549969634799477	-0.435646
TRINITY_DN3346_c0_g1	LOC108472791	65	3.35	89	3.63	66	3.88	3275	87.42	2047	122.43	2299	85.9	115	4.26	50	2.47	82	2.42	32	1.69	0	0	0	0	113	6.58	161	5.01	209	11.55	73.33	3.62	2540.33	98.58	82.33	3.05	10.67	0.56	161	7.71	0.664304481789868	-0.254026	normal	0.087622769228582	-2.61008	normal	0.0938999763221095	1.07300577559183
TRINITY_DN335_c0_g2	LOC120132250	32	1.73	60	2.56	48	2.95	339	9.47	83	5.2	261	10.21	99	3.84	20	1.04	147	4.54	93	5.14	32	2.02	26	1.52	132	8.04	188	6.11	120	6.96	46.67	2.41	227.67	8.29	88.67	3.14	50.33	2.89	146.67	7.04	0.618455959632223	0.380438856471864	normal	0.696744169119692	0.341286567709493	normal	0.0206132073825569	1.54189754299896
TRINITY_DN3383_c0_g1	LOC120198738	502	21.19	988	32.91	804	38.41	481	10.51	179	8.69	350	10.71	803	24.29	486	19.73	1059	25.58	420	18.12	442	21.9	644	29.45	796	37.75	968	24.66	815	36.86	764.67	30.84	336.67	9.97	782.67	23.2	502	23.16	859.67	33.09	0.167863174572596	-0.417466	normal	0.360114860888594	-0.331437	normal	0.792764019974596	0.0964701872651392
TRINITY_DN34_c1_g1	LOC120200194	995	52.53	1085	45.02	529	31.59	850	23.12	332	20.13	554	21.07	880	33.29	785	39.7	1479	44.57	437	23.53	362	22.41	419	24	224	13.31	1202	38.17	463	26.21	869.67	43.05	578.67	21.44	1048	39.19	406	23.31	629.67	25.9	0.612492895502916	-0.144125	normal	0.0126815298820397	-0.811341	normal	0.0826015677322258	-0.759678
TRINITY_DN34502_c0_g1	LOC111314783	320	24.56	405	24.36	365	31.7	4370	173.06	1394	124.86	3059	169.49	316	17.33	338	24.77	249	10.86	509	39.67	409	36.75	385	31.95	63	5.47	517	23.72	225	18.42	363.33	26.87	2941	155.8	301	17.65	434.33	36.12	268.33	15.87	0.118365216251166	-0.618469	normal	0.145917434991316	0.500242823321713	normal	0.174671379510257	-0.79129
TRINITY_DN3451_c0_g1	LOC120131360	324	18.35	347	15.7	216	13.57	278	7.97	65	4.39	250	9.96	352	14.36	265	14.34	405	13.06	195	11.17	209	13.98	118	7.44	45	2.96	501	16.77	227	13.23	295.67	15.87	197.67	7.44	340.67	13.92	174	10.86	257.67	10.99	0.530040565226735	-0.202219	normal	0.273732283779418	-0.490258	normal	0.411646500076536	-0.537199
TRINITY_DN3493_c0_g1	LOC108470287	822	28.48	1026	30.26	636	25.3	2850	55.2	1357	58.11	2031	54.57	1150	27.26	1212	39.35	1120	23.4	611	23.81	633	27.03	448	19.53	280	11.52	1748	37.37	758	30.05	828	28.01	2079.33	55.96	1160.67	30	564	23.46	928.67	26.31	0.600563707235811	0.149779300516594	normal	0.366777576532682	-0.272617	normal	0.749785439759324	-0.138763
TRINITY_DN3564_c0_g1	--	1132	71.92	1716	86.13	1064	74.19	6084	181.54	2756	201.58	4567	188.3	1860	76.94	1549	83.5	2559	88.21	992	60.73	1248	90.92	1377	88.12	939	67.87	2285	82.06	972	59.21	1304	77.41	4469	190.47	1989.33	82.88	1205.67	79.92	1398.67	69.71	0.297041373862846	0.208635999868499	normal	0.500056112490321	0.18440249287493	normal	0.703513757496094	-0.0964763
TRINITY_DN36194_c0_g1	LOC110409219	124	3.62	181	6.21	63	1.97	687	11.6	303	11.14	498	11.41	256	6.36	212	8.11	261	5.31	192	6.57	79	2.56	174	5.91	122	5.02	258	5.71	130	4.88	122.67	3.93	496	11.38	243	6.59	148.33	5.01	170	5.2	0.139393566145359	0.659831176549318	normal	0.318331634660103	0.583341001012126	normal	0.545510724355798	0.348397469338501
TRINITY_DN3626_c0_g1	LOC18609508	325	11.36	445	14.22	422	18.15	2397	45.42	1236	52.5	1716	45.32	574	15.92	404	13.48	897	20.2	441	15.02	480	21.54	553	21.71	165	5.41	761	18.01	358	15.72	397.33	14.58	1783	47.75	625	16.53	491.33	19.42	428	13.05	0.574479114880406	0.175319449421028	normal	0.112335201101587	0.55763740953246	normal	0.672475170998448	-0.19573
TRINITY_DN3630_c0_g1	LOC120126464	220	11.59	151	6.23	211	12.7	155	4.27	20	1.27	96	3.7	223	8.58	273	13.81	560	17.04	136	7.38	183	11.31	333	19.04	195	11.66	381	12.24	242	13.66	194	10.17	90.33	3.08	352	13.14	217.33	12.58	272.67	12.52	0.454220747492494	0.341009113590738	normal	0.49185994321852	0.374876189622758	normal	0.595327588598916	0.268238197542343
TRINITY_DN36343_c0_g1	--	92	4.54	196	7.79	124	6.68	625	16.18	366	21.11	507	18.66	228	8.43	175	8.43	141	4.06	147	7.86	239	14.1	91	5.11	134	7.61	211	6.49	142	8.06	137.33	6.34	499.33	18.65	181.33	6.97	159	9.02	162.33	7.39	0.864435821972234	0.0837814779462102	normal	0.362063888577472	0.525204407777849	normal	0.787829740245791	0.147338406875415
TRINITY_DN36570_c0_g1	LOC120156812	519	140.11	1010	205.09	909	279.5	356	49.49	150	51	259	50.34	732	138.56	364	90.83	1346	200.05	859	228.38	584	182.27	1025	298.51	37	11.66	542	83.49	364	102.52	812.67	208.23	255	50.28	814	143.15	822.67	236.39	314.33	65.89	0.162375154555153	-0.518424	normal	0.447002508726929	0.270562711923833	normal	0.0113226988669892	-1.67172
TRINITY_DN3719_c0_g1	LOC105804336	3005	93.97	3941	97.34	4790	171.9	2489	39.93	1356	50.19	1894	42.26	6418	147.51	4253	129.8	10330	187.13	3220	105.67	3514	133.73	4514	157.4	3819	135.96	5338	101.49	3441	119.75	3912	121.07	1913	44.13	7000.33	154.81	3749.33	132.27	4199.33	119.07	0.259223210486445	0.323290503618761	normal	0.590782147125172	0.164579981125184	normal	0.859371025213195	-0.0547344
TRINITY_DN3792_c0_g1	LOC105794096	76	6.57	243	16.43	114	11.16	1531	68.31	948	96.04	866	54.06	184	11.36	241	19.87	359	17.62	127	11.14	52	5.26	159	14.87	84	8.23	312	16.09	130	11.98	144.33	11.39	1115	72.8	261.33	16.28	112.67	10.42	175.33	12.1	0.275758411046569	0.524280927024981	normal	0.963034570195875	-0.0296908	normal	0.896956264956243	0.0810770692243599
TRINITY_DN3817_c0_g1	LOC120174817	1404	61.7	625	21.57	456	25.89	466	12.68	386	23.09	328	12.47	905	28.98	379	18.36	1148	32.54	460	23.27	343	20.09	585	32.34	708	35.02	600	16.33	355	19.69	828.33	36.39	393.33	16.08	810.67	26.63	462.67	25.23	554.33	23.68	0.207414141561191	-0.557481	normal	0.179756765270695	-0.618254	normal	0.229240381018806	-0.65238
TRINITY_DN3825_c0_g2	LOC120218856	821	34.92	750	25.48	574	26.52	402	9.04	189	9.49	315	10.04	996	29.51	1169	47.21	1551	37.1	172	7.16	578	27.97	939	41.72	1095	51.93	1566	39.47	996	44.94	715	28.97	302	9.52	1238.67	37.94	563	25.62	1219	45.45	0.180019877668977	0.385660969744324	normal	0.90128238145604	-0.0643408	normal	0.0371795396959811	0.642151790047567
TRINITY_DN38264_c0_g1	LOC120113895	74	95.25	46	38.25	31	46.47	6	3.94	0	0	2	1.83	20	16.87	44	46.47	51	32.19	1	1.13	19	27.04	20	27.57	63	102.93	97	60.15	38	46.92	50.33	59.99	2.67	1.92	38.33	31.84	13.33	18.58	66	70	0.333510208873163	-0.783924	normal	0.181314078380729	-1.62853	normal	0.801755500433876	0.217879344038123
TRINITY_DN3839_c0_g1	LOC120158720	602	10.06	789	10.24	312	6.33	580	5.01	242	4.4	361	4.32	790	10.13	493	8.09	644	6.19	401	7.58	378	7.31	591	10.56	485	8.98	858	8.54	508	9.38	567.67	8.88	394.33	4.58	642.33	8.14	456.67	8.48	617	8.97	0.602366306848049	-0.170984	normal	0.991492760424297	0.00402951622467943	normal	0.95309111275552	0.0210625248068706
TRINITY_DN38615_c0_g2	LOC120156725	136	44.9	220	53.96	84	31.65	113	19.2	58	24.71	95	22.56	207	47.64	81	24.48	224	40.32	184	59.27	152	57.79	147	52.32	53	20.62	480	89.18	102	34.89	146.67	43.5	88.67	22.16	170.67	37.48	161	56.46	211.67	48.23	0.69103806230286	-0.192534	normal	0.356465789750174	0.458231209814021	normal	0.825007935969965	0.160622224552662
TRINITY_DN3862_c0_g1	--	3837	145.86	4704	165.88	3460	201.58	1781	29.61	1148	40.54	1181	29.77	4834	149.02	2537	100.23	5949	163.64	2824	104.09	2187	104.04	4412	197.8	2930	103.06	5711	148.48	2469	103.1	4000.33	171.11	1370	33.31	4440	137.63	3141	135.31	3703.33	118.21	0.145963834991922	-0.312707	normal	0.769971589231001	-0.084686	normal	0.17618250114205	-0.297977
TRINITY_DN3862_c0_g2	LOC111280992	375	31.86	561	37.28	487	46.83	286	12.53	249	24.76	177	10.85	535	32.45	408	33.04	846	40.78	411	35.41	513	50.99	660	60.61	1010	97.18	890	45.1	626	56.67	474.33	38.66	237.33	16.05	596.33	35.42	528	49	842	66.32	0.664694721545457	-0.129509	normal	0.244568438416565	0.420976904155214	normal	0.061865648555261	0.779855081684948
TRINITY_DN3868_c0_g1	LOC120187316	2722	95.87	4838	130.21	5133	194.81	3238	58.32	1739	66.68	2317	57.5	6757	173.49	4535	152.03	11315	226.67	4506	164.03	4976	205.06	10936	407.71	2833	114.59	5805	122.3	3092	117.27	4231	140.3	2431.33	60.83	7535.67	184.06	6806	258.93	3910	118.05	0.26353487423621	0.332399866075185	normal	0.0140538143436471	0.934208127193079	normal	0.291404402583229	-0.319733
TRINITY_DN3929_c0_g1	--	474	13.61	411	9.34	531	17.11	2125	31.37	1074	35.08	1562	32.27	607	12.45	242	6.64	851	13.93	448	13.08	365	12.31	423	13.04	252	8.06	693	12.05	425	12.99	472	13.35	1587	32.91	566.67	11.01	412	12.81	456.67	11.03	0.45156628383911	-0.296413	normal	0.982881732560266	0.0080235845421532	normal	0.463945154412854	-0.305177
TRINITY_DN39412_c0_g1	LOC120206307	526	79.85	880	104.23	524	91.44	439	34.8	66	12.3	263	29.14	496	53.03	359	51.8	1032	88.34	236	35.65	370	66.24	588	96.62	534	91.22	368	32.78	270	44.2	643.33	91.84	256	25.41	629	64.39	398	66.17	390.67	56.07	0.119744899380798	-0.492963	normal	0.353983441205887	-0.381285	normal	0.147069166489748	-0.690899
TRINITY_DN3992_c0_g1	LOC120179824	349	14.34	286	9.62	175	8.03	218	4.75	115	5.65	166	5.06	261	7.9	185	7.57	479	11.36	174	7.57	67	3.26	238	10.63	214	10.26	220	5.59	111	4.78	270	10.66	166.33	5.15	308.33	8.94	159.67	7.15	181.67	6.88	0.475958025051276	-0.287966	normal	0.361558545229175	-0.51008	normal	0.243469402741298	-0.649218
TRINITY_DN40310_c0_g2	LOC120216392	43	2.28	13	0.54	60	3.59	481	13.04	86	5.26	382	14.47	108	4.1	51	2.59	183	5.53	57	3.08	23	1.43	87	4.98	54	3.22	47	1.5	97	5.49	38.67	2.14	316.33	10.92	114	4.07	55.67	3.16	66	3.4	0.260017586536474	0.904180837399469	normal	0.520340376829444	0.630698030953261	normal	0.549160812280708	0.631767896458017
TRINITY_DN4046_c0_g1	LOC105769822	284	15.51	476	20.07	239	14.9	2065	58.25	1197	74.01	1498	58.83	344	13.38	276	14.58	553	17.41	306	17.3	192	11.91	211	12.31	510	31.11	334	11.16	293	17.57	333	16.83	1586.67	63.7	391	15.12	236.33	13.84	379	19.95	0.591782424905857	-0.170447	normal	0.615987713112158	-0.198189	normal	0.637907871866385	0.242410593802939
TRINITY_DN40462_c0_g1	LOC120132543	217	12.44	363	16.38	219	14.2	1696	50.18	569	37.79	1142	47.28	292	11.99	196	10.76	231	7.55	319	18.63	252	16.93	168	10.41	151	9.76	557	19.18	216	13.24	266.33	14.34	1135.67	45.08	239.67	10.1	246.33	15.32	308	14.06	0.162878357320881	-0.512446	normal	0.683813352120194	0.172499999228151	normal	0.925921280650711	-0.0426617
TRINITY_DN4091_c0_g2	--	215	18.67	264	17.93	145	14.26	1597	71.55	971	98.79	1213	76.04	401	24.86	292	24.17	483	23.8	235	20.69	296	30.08	238	22.34	137	13.48	416	21.54	234	21.65	208	16.95	1260.33	82.13	392	24.28	256.33	24.37	262.33	18.89	0.117290302106509	0.5136328497475	normal	0.152654705187441	0.598204516469334	normal	0.766438576983653	0.138727225936368
TRINITY_DN41129_c0_g1	--	440	33.94	710	42.91	874	76.3	264	10.51	110	9.9	197	10.97	733	40.41	441	32.47	1233	54.04	286	22.4	620	55.99	892	74.39	218	19.02	881	40.62	433	35.63	674.67	51.05	190.33	10.46	802.33	42.31	599.33	50.93	510.67	31.76	0.452734725419217	-0.27899	normal	0.876031945844374	0.0741164339678329	normal	0.122592587876352	-0.711948
TRINITY_DN4113_c0_g1	--	11	0.5	162	5.88	73	3.8	2347	55.91	1868	99.32	1637	54.59	77	2.53	88	3.88	105	2.77	140	6.65	131	7.05	108	5.41	125	6.45	115	3.19	212	10.43	82	3.39	1950.67	69.94	90	3.06	126.33	6.37	150.67	6.69	0.868737646287212	-0.133582	normal	0.210622815347891	1.00102632025573	normal	0.288466603386569	0.985718689813355
TRINITY_DN4185_c0_g1	LOC120177898	951	47.73	809	31.5	564	31.52	744	18.58	366	20.92	472	16.42	914	32.63	599	28.1	1256	35.09	621	31.33	430	25.32	522	27.7	951	52.68	858	25.84	735	38.49	774.67	36.92	527.33	18.64	923	31.94	524.33	28.12	848	39	0.466574018777557	-0.208283	normal	0.336021621199073	-0.317126	normal	0.825053961970329	0.0880314262729067
TRINITY_DN4235_c0_g1	LOC120116640	730	27.58	273	7.93	618	26.34	485	9.48	150	6.51	340	9.2	294	7.95	286	10.37	508	10.96	158	6.2	0	0	144	5.87	231	9.78	632	14.72	590	24.12	540.33	20.62	325	8.4	362.67	9.76	100.67	4.02	484.33	16.21	0.0160144668069151	-1.11506	normal	0.189770812333152	-2.31072	normal	0.453117415217548	-0.417323
TRINITY_DN42395_c0_g1	LOC111318725	584	24.54	266	9.42	454	21.78	229	5.22	12	0.76	218	6.9	735	22.43	460	19.92	1047	25.45	310	13.44	265	13.06	277	12.48	970	55.15	695	18.29	518	25.65	434.67	18.58	153	4.29	747.33	22.6	284	12.99	727.67	33.03	0.569761188755279	0.23358052169715	normal	0.341033806639389	-0.439241	normal	0.228757782939304	0.653206746935524
TRINITY_DN4302_c0_g1	--	223	6.95	200	5	59	2.11	52	0.85	0	0	53	1.21	129	2.93	77	2.21	192	3.29	31	1	56	2.08	35	1.11	82	2.91	125	2.39	128	4.01	160.67	4.69	35	0.69	132.67	2.81	40.67	1.4	111.67	3.1	0.20522751715053	-0.705102	normal	0.019502312357405	-1.65836	normal	0.406225888467424	-0.571561
TRINITY_DN4324_c0_g1	LOC120197119	148	3.61	142	2.19	46	1.01	2107	22.79	1759	43.97	1250	19.04	143	2.34	143	2.77	146	1.73	123	2.63	69	1.73	260	6.16	100	2.78	57	0.78	41	0.86	112	2.27	1705.33	28.6	144	2.28	150.67	3.51	66	1.47	0.945436267640303	0.0381934815626917	normal	0.283275424784322	0.730870476022748	normal	0.411633561918317	-0.694599
TRINITY_DN43787_c0_g1	LOC120172610	955	22.17	2246	40.11	2609	67.24	1178	13.55	687	17.25	894	14.74	3266	53.62	2082	45.76	4177	54.13	2312	54.57	1940	52.6	3552	87.47	1285	33.66	2173	30.07	1633	39.83	1936.67	43.17	919.67	15.18	3175	51.17	2601.33	64.88	1697	34.52	0.508179406554772	0.233473695459257	normal	0.0918849780449212	0.659757280790074	normal	0.380044666720695	-0.350417
TRINITY_DN4390_c0_g2	LOC105767848	495	23.25	691	25.4	446	23.45	2125	50.21	720	38.09	1435	47.55	694	23.03	749	33.47	1305	34.39	597	28.18	489	26.49	553	27.68	336	17.88	1074	30.18	529	26.56	544	24.03	1426.67	45.28	916	30.3	546.33	27.45	646.33	24.87	0.219876252278382	0.338148666977005	normal	0.332216761636197	0.283415593060665	normal	0.942129054521588	0.0245893889765713
TRINITY_DN4410_c0_g1	LOC120218131	617	22.67	939	27.19	472	19.53	2634	50.02	927	39.45	1960	52.04	1168	30.59	1023	36.14	1245	26.1	1068	40.29	793	34.09	695	27.69	496	20.36	1063	23.47	635	25.09	676	23.13	1840.33	47.17	1145.33	30.94	852	34.02	731.33	22.97	0.106328740830156	0.413959183738915	normal	0.03375448106379	0.629877112589064	normal	0.944585652909106	-0.0203999
TRINITY_DN443_c0_g1	LOC120218171	1402	93.4	1693	88.7	976	66.03	7144	197.67	4199	271.78	4813	188.27	1675	69.86	847	45.29	2105	68.18	1226	75.4	1422	89.87	1515	90	1450	94.24	2091	74.59	1315	86.81	1357	82.71	5385.33	219.24	1542.33	61.11	1387.67	85.09	1618.67	85.21	0.295976136161936	-0.264692	normal	0.220769596762201	0.323438834758811	normal	0.550766898135018	0.157075999164441
TRINITY_DN4431_c0_g1	--	1383	20.16	1320	15.29	1041	17.11	1419	10.53	570	9.39	977	10.18	1324	13.73	792	11.14	1698	14.26	657	9.79	950	15.99	907	14.26	1789	29.4	1526	13.54	1234	19.06	1248	17.52	988.67	10.03	1271.33	13.04	838	13.35	1516.33	20.67	0.0759721608171605	-0.441213	normal	0.315218993133876	-0.310944	normal	0.513779367768959	0.239202294455104
TRINITY_DN447_c1_g2	LOC120122383	612	28.33	968	40.05	841	38.34	1068	25.14	359	18.84	725	24.93	1023	34.76	906	39.06	1316	34.9	422	12.09	471	13.18	694	20.9	948	54.83	1240	33.92	402	18.94	807	35.57	717.33	22.97	1081.67	36.24	529	15.39	863.33	35.9	0.978235458194921	0.00726056905831696	normal	0.326658211756828	-0.344283	normal	0.912852023455286	-0.0464293
TRINITY_DN4501_c0_g1	--	488	17.95	511	15.25	378	19.92	624	12.87	182	8.9	447	12.53	483	12.72	423	16.87	680	15.13	330	13.15	249	12.02	396	16.39	499	22.59	640	15.96	316	12.77	459	17.71	417.67	11.43	528.67	14.91	325	13.85	485	17.11	0.429692029861651	-0.221889	normal	0.501931258583422	-0.242749	normal	0.920782939047593	-0.0391078
TRINITY_DN45549_c0_g1	LOC120141775	1296	281.68	1151	199.98	898	266.64	379	64.53	143	70.26	296	72.04	1597	234.57	1063	235.38	1744	203.97	564	134.04	642	204.12	507	190.09	1073	255.36	1558	225.23	842	191.14	1115	249.43	272.67	68.94	1468	224.64	571	176.08	1157.67	223.91	0.864464300388787	-0.0426119	normal	0.0208708582785909	-0.71171	normal	0.776152994930831	-0.088227
TRINITY_DN456_c0_g1	LOC120214803	863	123.02	1836	138.34	937	131.19	1597	111.91	593	64.02	1088	113.15	1531	105.78	1273	146.51	2057	138.75	1533	205.71	1255	159.95	1377	156.59	816	69.13	1517	84.05	744	114.16	1212	130.85	1092.67	96.36	1620.33	130.35	1388.33	174.08	1025.67	89.11	0.83226189562697	0.0520894557524869	normal	0.0596636303490622	0.510920128512777	normal	0.225695411741597	-0.358837
TRINITY_DN4562_c0_g1	LOC120205756	561	40.11	868	52.82	613	54.3	5237	208.05	2142	195.1	3753	207.22	477	25.14	566	41.69	1040	45.54	435	34.08	256	23.4	325	26.21	240	21.3	954	42.65	676	55.77	680.67	49.08	3710.67	203.46	694.33	37.46	338.67	27.9	623.33	39.91	0.193570050628401	-0.396432	normal	0.0249661947790768	-0.744395	normal	0.418608494339616	-0.334255
TRINITY_DN4584_c0_g1	LOC120181166	1438	132.11	1454	144.29	557	75.33	8187	394.56	2728	347.57	6029	411.34	1416	85.32	786	79.58	1649	90.81	705	62.92	434	42.9	480	53.51	1346	128.72	1816	112	787	90.57	1149.67	117.24	5648	384.49	1283.67	85.24	539.67	53.11	1316.33	110.43	0.43331523200786	-0.254629	normal	0.0290894898928646	-0.804043	normal	0.790132782052246	0.106195068192536
TRINITY_DN4586_c0_g1	--	165	4.57	493	11.57	209	6.77	4347	75.17	1808	70.13	3225	77.88	323	7.2	249	7.4	387	6.88	242	7.45	375	13.66	425	14.27	91	3.52	469	7.39	141	5.18	289	7.64	3126.67	74.39	319.67	7.16	347.33	11.79	233.67	5.36	0.635681769017906	-0.186864	normal	0.170528162267932	0.630517388296698	normal	0.332663030567036	-0.56773
TRINITY_DN4645_c0_g1	--	233	9.8	206	7.06	231	10.12	1830	36.76	870	38.15	1284	35.82	454	13.62	349	13.75	481	10.35	436	17.48	205	10	356	15.56	157	6.94	435	10.65	220	10.14	223.33	8.99	1328	36.91	428	12.57	332.33	14.35	270.67	9.24	0.169600990725485	0.491755825612521	normal	0.0808439745481444	0.77572575800268	normal	0.978160217120653	0.0129437620161058
TRINITY_DN4649_c0_g1	LOC120209655	671	38.02	1038	46.28	591	37.86	685	20.03	266	17.45	511	20.9	836	33.91	577	31.31	1019	32.92	748	43.17	376	24.97	606	37.12	489	31.24	1109	37.74	706	42.76	766.67	40.72	487.33	19.46	810.67	32.71	576.67	35.09	768	37.25	0.169116515621747	-0.320209	normal	0.688045713413225	-0.132001	normal	0.617945444848191	-0.142182
TRINITY_DN4722_c1_g1	LOC120165175	1063	73.38	1682	95.58	818	66.7	1450	56.82	603	53.89	1045	57.22	1202	59.06	1027	69.28	1492	60.94	1447	111.65	949	86.17	1062	90.6	930	65.04	1699	74.63	979	78.99	1187.67	78.55	1032.67	55.98	1240.33	63.09	1152.67	96.14	1202.67	72.89	0.193869713597124	-0.300186	normal	0.350834588050577	0.25513418010092	normal	0.717122287980302	-0.0934147
TRINITY_DN47325_c0_g1	LOC120139241	192	11.09	178	8.09	129	8.43	35	1.04	21	1.4	26	1.08	114	4.71	63	3.48	226	7.44	34	2	86	5.82	23	1.44	302	19.67	147	5.1	74	4.57	166.33	9.2	27.33	1.17	134.33	5.21	47.67	3.09	174.33	9.78	0.0927238428440599	-0.826812	normal	0.0308477106037426	-1.5181	normal	0.884201885035588	0.107185655306764
TRINITY_DN4776_c0_g2	LOC120197834	267	15.06	347	15.57	229	14.55	1133	33.19	614	40.15	770	31.56	289	11.87	188	10.22	268	8.71	476	27.48	272	18.3	585	35.94	147	9.31	305	10.39	190	11.7	281	15.06	839	34.97	248.33	10.27	444.33	27.24	214	10.47	0.0879218701680789	-0.575408	normal	0.0191206904201974	0.928284583743057	normal	0.183625611074085	-0.547926
TRINITY_DN4816_c0_g1	LOC120156904	243	11.39	414	15.29	303	15.69	321	7.63	163	8.17	243	8.24	427	13.68	330	14.33	536	13.97	61	2.74	136	7.15	393	19.85	393	20.38	688	19.1	282	13.37	320	14.12	242.33	8.01	431	13.99	196.67	9.91	454.33	17.62	0.949941718063992	0.0193376236608117	normal	0.520728871207654	-0.403825	normal	0.394491089140731	0.342608798767407
TRINITY_DN4832_c0_g1	LOC120129027	630	30.66	1210	46.42	888	48.85	202	5.07	139	7.81	134	4.71	1481	51.65	1181	55.13	1665	46.26	662	32.86	491	28.02	647	34.04	544	29.81	1353	39.63	803	41.82	909.33	41.98	158.33	5.86	1442.33	51.01	600	31.64	900	37.09	0.288946255957495	0.275139518820795	normal	0.295363774311036	-0.325758	normal	0.539847092761755	-0.194181
TRINITY_DN4888_c0_g1	LOC120153209	613	48.19	725	44.64	851	75.7	612	24.82	376	34.51	374	21.22	1265	71.04	988	74.12	1899	84.8	564	45	701	64.5	1069	90.84	549	48.83	708	33.25	575	48.2	729.67	56.18	454	26.85	1384	76.65	778	66.78	610.67	43.43	0.134544560658854	0.437997539655452	normal	0.389644216936255	0.324834010165837	normal	0.307573058007058	-0.386538
TRINITY_DN4899_c0_g1	LOC120139938	232	6.63	452	12.84	184	6.36	1088	17.87	528	23.46	703	15.63	598	12.8	199	5.46	397	7.94	381	15.04	336	13.82	502	19.11	273	8.83	621	12.1	200	8.09	289.33	8.61	773	18.99	398	8.73	406.33	15.99	364.67	9.67	0.836703583344571	0.0868745125006219	normal	0.0353732897355462	0.824409003693076	normal	0.709607678538344	0.171377756141499
TRINITY_DN4905_c0_g1	LOC120133515	189	5.27	282	8.26	383	13.44	2624	41.19	1279	45.3	1728	37.19	442	10.11	404	12.59	654	12.37	562	19.02	388	15.62	357	12.7	113	3.54	575	11.19	598	24.53	284.67	8.99	1877	41.23	500	11.69	435.67	15.78	428.67	13.09	0.400358201600234	0.337684911623476	normal	0.0638493327693217	0.813854083993821	normal	0.575608947570723	0.353263578502759
TRINITY_DN4909_c0_g1	LOC120162130	1065	43.47	1246	41.01	549	26	51	1.34	46	2.16	17	0.6	1500	44.59	746	29.27	1788	42.22	745	31.8	943	45.08	1082	47.67	366	16.77	1538	37.79	646	28.19	953.33	36.83	38	1.37	1344.67	38.69	923.33	41.52	850	27.58	0.816603125319626	0.0686426961704857	normal	0.421118528897522	0.265363426436646	normal	0.286938979271413	-0.415244
TRINITY_DN49793_c0_g1	LOC120217695	136	6.17	173	6.75	50	2.57	0	0	0	0	0	0	74	2.53	146	6.36	110	2.85	36	1.67	24	1.46	9	0.44	258	13.18	141	3.86	44	2.45	119.67	5.16	0	0	110	3.91	23	1.19	147.67	6.5	0.550525306020199	-0.36909	normal	0.0120524727872281	-2.06592	normal	0.640848902276202	0.395852175509909
TRINITY_DN4980_c0_g1	--	580	11.49	1139	18.18	1270	28.94	884	9.14	293	6.8	609	8.62	1603	22.85	1418	27.64	3341	38.75	344	7.14	489	11.67	927	20.11	385	8.77	1100	13.03	657	14.33	996.33	19.54	595.33	8.19	2120.67	29.75	586.67	12.97	714	12.04	0.0936024425412939	0.590502472843877	normal	0.255900620864344	-0.514164	normal	0.0791587932527086	-0.720254
TRINITY_DN503_c0_g1	--	380	15.52	745	24.15	509	23.97	2276	46.89	1077	50.04	1582	45.57	681	19.48	665	25.87	1015	22.93	614	25.66	837	39.27	787	34.92	863	37.44	1121	27.81	616	27.27	544.67	21.21	1645	47.5	787	22.76	746	33.28	866.67	30.84	0.628200645284263	0.140387783669024	normal	0.0241318116586976	0.753207392960219	normal	0.108198611706111	0.582050840999287
TRINITY_DN5042_c0_g1	LOC120210383	390	9.77	401	7.98	562	15.93	160	2.14	95	2.71	81	1.51	646	11.68	550	13.41	1297	18.8	320	8.23	279	8.17	584	16.14	364	10.34	506	7.77	489	13.45	451	11.23	112	2.12	831	14.63	394.33	10.85	453	10.52	0.337426830113004	0.351124558906756	normal	0.978134890214617	0.0122706452678819	normal	0.754358443628269	-0.139436
TRINITY_DN50721_c0_g1	LOC111313103	53	1.21	216	3.88	140	3.5	1135	12.95	525	13.1	829	12.99	284	4.75	217	4.65	360	4.61	149	3.33	115	3.15	197	4.95	156	4.02	296	3.83	217	5.24	136.33	2.86	829.67	13.01	287	4.67	153.67	3.81	223	4.36	0.162201586003344	0.696529900239572	normal	0.422033478349042	0.483269917820852	normal	0.324434807359844	0.612668335530349
TRINITY_DN50723_c0_g1	LOC111294156	32	0.75	116	2.94	40	1.06	361	4.74	341	11.31	225	4.25	122	2.2	145	3.46	193	2.94	22	0.79	77	2.48	79	2.21	175	6.87	206	3.44	130	3.94	62.67	1.58	309	6.77	153.33	2.87	59.33	1.83	170.33	4.75	0.0904687966529365	1.0046705319466	normal	0.702424308332876	0.329446658286211	normal	0.0368885746916054	1.46198186923936
TRINITY_DN5110_c0_g2	LOC120151493	475	54.55	756	62.84	1103	147.96	780	44.51	182	28.18	581	40.87	920	75.13	791	73.13	1733	112.43	982	110.35	1163	158.78	1168	133	721	90.15	935	52.66	877	103.54	778	88.45	514.33	37.85	1148	86.9	1104.33	134.04	844.33	82.12	0.917650197910168	0.0396893401509736	normal	0.066761306215204	0.716755038260059	normal	0.960659583857496	-0.0220409
TRINITY_DN519_c0_g1	LOC110422429	33	1.58	34	1.26	35	1.87	484	11.86	102	5.55	345	11.83	107	3.62	10	0.46	150	4.05	5	0.24	39	2.16	55	2.85	0	0	15	0.43	0	0	34	1.57	310.33	9.75	89	2.71	33	1.75	5	0.14	0.379551602711633	0.780333604055506	normal	0.837648490627137	0.226401468714805	normal	0.0806905014240113	-3.45066
TRINITY_DN519_c0_g2	LOC110422429	257	13.21	324	13.7	191	11.23	48	1.3	29	1.68	53	2.02	188	7.2	233	11.74	411	12.52	151	8.1	169	10.78	263	15	170	10.54	279	9	173	10.19	257.33	12.71	43.33	1.67	277.33	10.49	194.33	11.29	207.33	9.91	0.426104744975815	-0.303909	normal	0.801243465407368	-0.113225	normal	0.319803458757501	-0.428931
TRINITY_DN5233_c0_g1	LOC111301221	74	1.83	83	1.6	25	0.68	565	7.47	416	12.21	404	7.47	107	1.88	27	0.81	164	2.37	192	4.71	59	1.66	115	3.04	96	2.57	138	2.03	32	0.82	60.67	1.37	461.67	9.05	99.33	1.69	122	3.14	88.67	1.81	0.760336799087887	0.224312493070501	normal	0.0686891559532116	1.29530829543981	normal	0.616342810892952	0.438168432049428
TRINITY_DN5233_c1_g1	LOC108453527	61	1.48	131	2.62	371	10.59	2455	31.84	1030	29.27	1729	30.54	188	3.47	166	3.86	280	4.47	452	12.12	386	11.9	586	17.54	230	6.21	389	5.64	396	9.27	187.67	4.9	1738	30.55	211.33	3.93	474.67	13.85	338.33	7.04	0.556643950415104	-0.38563	normal	0.0179942053646578	1.47530799414107	normal	0.403918219112096	0.617238214946094
TRINITY_DN5242_c0_g1	LOC111314783	112	13.53	214	20.3	96	13.03	3142	196.99	1198	172.43	2312	202.45	260	22.47	210	24.26	330	22.49	257	31.72	256	36.56	211	27.85	97	13.79	409	29.3	388	49.67	140.67	15.62	2217.33	190.62	266.67	23.07	241.33	32.04	298	30.92	0.151618353124458	0.563879110405839	normal	0.0139034853799451	1.10381826994241	normal	0.117543340944996	0.958696722349736
TRINITY_DN5255_c0_g1	LOC105779535	101	4.67	57	2.15	124	6.66	1571	37.48	789	42.38	1086	36.32	69	2.38	115	5	224	6.09	88	3.97	226	12.59	119	6.12	0	0	186	5.33	98	5.04	94	4.49	1148.67	38.73	136	4.49	144.33	7.56	94.67	3.46	0.981343630289836	-0.0150005	normal	0.232434270388737	0.810945	normal	0.727494834444709	-0.464383
TRINITY_DN5261_c0_g1	--	110	3.77	49	1.3	76	2.91	664	11.52	409	15.41	437	10.58	61	1.51	65	2.2	128	2.51	57	1.92	49	1.95	71	2.63	136	5.18	136	2.75	193	6.89	78.33	2.66	503.33	12.5	84.67	2.07	59	2.17	155	4.94	0.525211931231624	-0.41246	normal	0.762472768699594	-0.224114	normal	0.226773036186806	0.884236540951164
TRINITY_DN5263_c0_g1	LOC120203154	516	25.09	647	24.68	367	20.14	2437	59.8	1327	74.44	1845	63.3	730	25.23	514	23.77	865	23.44	584	29.18	345	19.78	498	26.19	306	16.3	776	22.53	381	19.98	510	23.3	1869.67	65.85	703	24.15	475.67	25.05	487.67	19.6	0.818184435313306	0.0590687709820841	normal	0.604813295126981	0.173632949289588	normal	0.445340623562763	-0.254654
TRINITY_DN5293_c0_g1	LOC120218855	163	4.46	328	7.08	371	11.52	1583	22.61	820	25.86	1044	20.81	609	12.15	385	10.21	783	12.32	328	9.2	332	10.69	366	10.9	256	7.89	913	15.26	386	11.5	287.33	7.69	1149	23.09	592.33	11.56	342	10.26	518.33	11.55	0.153978870794784	0.565007222188181	normal	0.273718906789043	0.48932261228269	normal	0.27142131278402	0.54964282813392
TRINITY_DN5323_c0_g1	LOC120169747	1199	43.66	1225	35.95	505	20.69	691	13.08	340	14.52	504	13.35	1076	28.19	733	26.18	1222	25.46	514	19.15	553	23.41	876	34.36	457	19.77	952	21.58	551	21.21	976.33	33.43	511.67	13.65	1010.33	26.61	647.67	25.64	653.33	20.85	0.267914088786919	-0.342251	normal	0.449286741756881	-0.28756	normal	0.0457494376683192	-0.718224
TRINITY_DN53371_c0_g2	LOC120166157	165	6.63	175	4.74	181	7.48	46	0.77	46	1.76	60	1.41	204	5.51	176	5.82	318	6.87	78	2.99	1	0.06	18	0.81	417	15.67	416	9.23	236	8.65	173.67	6.28	50.67	1.31	232.67	6.07	32.33	1.29	356.33	11.18	0.910079412659852	-0.0450579	normal	0.0211284968333486	-2.26828	normal	0.067029589573527	0.93736105204039
TRINITY_DN5373_c0_g1	LOC120136405	207	7.1	286	8.39	143	5.6	1151	22.95	439	18.93	717	20.15	474	12.8	168	6.27	368	8.71	196	7.63	205	8.27	178	8.19	362	18.19	388	8.89	103	4.41	212	7.03	769	20.68	336.67	9.26	193	8.03	284.33	10.5	0.540654279414099	0.252093415506658	normal	0.696956489086013	0.168102084833348	normal	0.556627728426975	0.35596417774196
TRINITY_DN5383_c0_g1	LOC120115174	128	3.42	526	11.08	411	17.32	5172	140.57	2680	127.37	3682	140.04	642	20.28	659	27.91	847	19.76	565	27.68	636	32.35	723	24.33	160	4.75	507	12.99	410	24.25	355	10.61	3844.67	135.99	716	22.65	641.33	28.12	359	14	0.147106585929544	0.645327582224046	normal	0.0130679010105405	1.15008998258898	normal	0.803969887078553	-0.145798
TRINITY_DN5433_c0_g1	LOC120169227	165	5.79	239	6.15	153	6.18	190	3.3	58	1.93	116	2.65	207	5.67	146	5.41	199	4.25	14	0.55	75	2.79	62	2.36	149	6.57	261	6.03	132	4.81	185.67	6.04	121.33	2.63	184	5.11	50.33	1.9	180.67	5.8	0.29968707745044	-0.398134	normal	0.0289311398114196	-1.56105	normal	0.703562656156303	-0.181578
TRINITY_DN5448_c0_g1	LOC120190822	90	3.65	283	8.94	135	6.96	859	18.24	644	30.12	632	19.07	426	12.3	192	7.01	285	6.13	225	9.27	258	12.73	131	6.06	32	1.53	187	4.52	143	6.03	169.33	6.52	711.67	22.48	301	8.48	204.67	9.35	120.67	4.03	0.299531112373328	0.488446680681967	normal	0.248670170652669	0.616954632906306	normal	0.375185570352913	-0.64914
TRINITY_DN5499_c0_g1	LOC107914955	128	6.05	229	8.9	108	6.58	1095	29.89	294	17.22	719	27.03	169	5.85	119	6.16	154	4.26	208	10.48	118	7.06	171	9.96	67	4.1	368	11.93	85	4.88	155	7.18	702.67	24.71	147.33	5.42	165.67	9.17	173.33	6.97	0.337171620308008	-0.418583	normal	0.416204083284097	0.399615578436986	normal	0.80366494048368	-0.162562
TRINITY_DN55279_c0_g2	--	326	68.4	386	61.69	439	104.71	398	43.03	150	38.68	274	41.43	506	75	478	93.65	930	108.58	194	40.47	202	49.21	419	94.9	210	50.91	392	47.61	203	44.75	383.67	78.27	274	41.05	638	92.41	271.67	61.53	268.33	47.76	0.462791781629009	0.2497499614843	normal	0.56914451747683	-0.265651	normal	0.0880473009320097	-0.723644
TRINITY_DN55482_c0_g1	LOC120120395	330	14.39	401	13.78	414	20.2	324	7.19	111	5.58	256	7.92	669	20.66	261	10.82	681	16.85	330	14.61	402	20.5	1122	52.53	181	8.52	458	11.94	271	12.58	381.67	16.12	230.33	6.9	537	16.11	618	29.21	303.33	11.01	0.982548019404296	-0.00795971	normal	0.0552144918057488	0.942276746547416	normal	0.175736080138468	-0.556823
TRINITY_DN5590_c0_g1	LOC120198037	1868	111.08	1931	89.78	1123	75.67	1128	33.63	379	24.99	816	34.02	2131	90.24	1476	83.89	2487	84.16	748	44.17	1277	87.83	1554	98.87	1868	125.39	2210	78.8	966	60.94	1640.67	92.18	774.33	30.88	2031.33	86.1	1193	76.96	1681.33	88.38	0.645394261744822	-0.10648	normal	0.632699737397118	-0.165365	normal	0.872900023034915	-0.0568376
TRINITY_DN5616_c0_g1	LOC111287334	576	31.22	466	19.83	210	12.99	252	7.1	81	5.06	193	7.6	241	9.35	264	13.75	355	10.92	171	9.48	142	8.99	175	10.27	438	26.85	374	12.26	159	9.25	417.33	21.35	175.33	6.59	286.67	11.34	162.67	9.58	323.67	16.12	0.0246245350990472	-0.923637	normal	0.0183044976063559	-1.0832	normal	0.489912415483484	-0.399247
TRINITY_DN5618_c0_g1	LOC120150026	110	5.48	232	9.14	157	8.87	692	17.89	415	23.98	547	19.8	220	7.87	149	7.14	237	6.74	243	12.35	68	3.98	162	8.81	86	4.83	478	14.35	263	14.06	166.33	7.83	551.33	20.56	202	7.25	157.67	8.38	275.67	11.08	0.782807762056105	-0.114116	normal	0.753140227144006	0.182385224284538	normal	0.425483155324532	0.475516834018763
TRINITY_DN5618_c1_g1	LOC120218812	23	1.22	85	3.56	100	6.01	513	14.06	228	14.01	355	13.62	199	7.57	78	3.97	157	4.76	48	2.6	25	1.56	67	3.85	124	7.42	257	8.21	103	5.85	69.33	3.6	365.33	13.9	144.67	5.43	46.67	2.67	161.33	7.16	0.385740786358124	0.588957860957897	normal	0.695755748769759	-0.342465	normal	0.203540401113042	0.986439232975068
TRINITY_DN56287_c0_g1	--	92	24.31	196	33.69	259	68.88	2076	289.75	751	264.18	1474	280.35	230	39.62	305	69.93	281	37.89	139	31.13	16	4.19	74	19.13	182	52.05	299	43.82	146	38.16	182.33	42.29	1433.67	278.09	272	49.15	76.33	18.15	209	44.68	0.725359698391945	0.182462869021387	normal	0.160657248919721	-1.08575	normal	0.993203512340994	-0.00518339
TRINITY_DN5673_c0_g1	LOC120146131	1151	47.77	1187	38.41	674	31.23	975	20.77	416	19.84	656	19.82	1254	36.85	745	29.18	1155	26.92	828	35.18	785	37.76	834	36.25	557	27.04	1145	28.4	756	33.24	1004	39.14	682.33	20.14	1051.33	30.98	815.67	36.4	819.33	29.56	0.21062938832209	-0.338083	normal	0.941219869504041	-0.0213165	normal	0.142588452256507	-0.439373
TRINITY_DN576_c1_g1	--	130	6.85	689	28.63	322	18.93	3272	89.36	1786	109.84	2407	92	412	15.53	583	29.54	859	25.56	748	40.39	345	21.36	596	34.19	194	11.73	696	22	589	33.25	380.33	18.14	2488.33	97.07	618	23.54	563	31.98	493	22.33	0.417539697013396	0.387009702272585	normal	0.0680402365373842	0.904512025857058	normal	0.641630784400239	0.275785741151295
TRINITY_DN5771_c0_g1	LOC120192612	427	23.53	724	31.67	349	21.6	513	14.6	172	10.78	415	16.45	592	23.45	396	20.86	739	23.26	474	27.3	400	25.5	461	27.12	160	10.03	828	27.01	522	30.57	500	25.6	366.67	13.94	575.67	22.52	445	26.64	503.33	22.54	0.502612362685947	-0.18586	normal	0.658294641680183	0.142913832168847	normal	0.682419808021329	-0.195666
TRINITY_DN58049_c0_g1	LOC120182737	390	287.09	294	142.28	319	208.12	69	17.73	58	28.66	28	7.57	235	129.33	218	151.18	432	183.34	157	126.89	183	183.26	117	100.43	190	84.79	256	102.97	40	24.48	334.33	212.5	51.67	17.99	295	154.62	152.33	136.86	162	70.75	0.0769752095728177	-0.672144	normal	0.0467188404312221	-0.909916	normal	0.0588097340687333	-1.25474
TRINITY_DN581_c0_g1	LOC120136328	779	15.17	920	14.1	779	17	3113	31.9	1639	38.32	2226	31.62	1051	14.73	709	13.28	1614	18.44	723	14.62	664	16.06	784	17.21	659	15.54	1180	14.25	618	13.51	826	15.42	2326	33.95	1124.67	15.48	723.67	15.96	819	14.43	0.907817652710231	-0.0295013	normal	0.827873449765321	0.0612656613508949	normal	0.514759792911095	-0.18604
TRINITY_DN5834_c0_g1	LOC120146830	699	26.09	1915	57.43	1122	49.04	5139	101.85	2520	111.59	3471	96.83	1270	34.46	1096	39.74	2002	43.75	1716	66.32	1121	50.29	1924	78.87	584	25.7	1852	43.08	985	39.99	1245.33	44.19	3710	103.42	1456	39.32	1587	65.16	1140.33	36.26	0.591584265692925	-0.1613	normal	0.0504924999255992	0.65665818960331	normal	0.393292449452786	-0.31167
TRINITY_DN5853_c1_g1	LOC120148158	171	5.75	266	6.44	258	8.98	867	14.28	673	23.07	652	15.45	329	7.12	137	3.8	293	4.48	207	6.87	206	7.19	410	13.34	129	3.72	297	5.88	225	8.33	231.67	7.06	730.67	17.6	253	5.13	274.33	9.13	217	5.98	0.41514314045711	-0.341877	normal	0.301112607350091	0.496501554596238	normal	0.579602450564919	-0.274359
TRINITY_DN5862_c0_g1	LOC120115416	356	19.2	176	7.51	86	5.25	94	2.61	28	1.76	51	1.98	284	10.99	71	3.67	173	5.33	124	6.84	164	10.39	70	4.09	105	6.39	229	7.46	13	0.75	206	10.65	57.67	2.12	176	6.66	119.33	7.11	115.67	4.87	0.257008241576248	-0.700443	normal	0.413128667876762	-0.531719	normal	0.209007794092433	-1.13493
TRINITY_DN58884_c0_g1	--	258	8.51	303	7.07	221	5.85	1224	15.42	737	20.54	858	15.78	526	8.97	407	10.29	567	8.54	308	6.99	352	9.4	238	6.85	188	5.81	544	7.16	330	10.26	260.67	7.14	939.67	17.25	500	9.27	299.33	7.75	354	7.74	0.0738048159233729	0.535276554098874	normal	0.232868343194955	0.468701795092451	normal	0.573467925455482	0.234257421842505
TRINITY_DN5936_c0_g1	--	1639	35.73	1956	34.7	1054	27	1820	23.28	1058	29.33	1240	20.43	1340	23.31	1251	26.47	2214	30.61	994	22.01	1019	28.05	1226	32.52	1102	31.36	1903	28.99	811	16.53	1549.67	32.48	1372.67	24.35	1601.67	26.8	1079.67	27.53	1272	25.63	0.133126861322815	-0.360214	normal	0.398265450280518	-0.228891	normal	0.138892194748138	-0.429426
TRINITY_DN5957_c0_g1	LOC120173654	24	0.98	25	0.81	35	1.47	482	9.32	157	6.94	312	8.48	113	3.13	71	2.61	94	2.08	78	2.96	0	0	28	1.12	86	3.59	54	1.24	117	4.78	28	1.09	317	8.25	92.67	2.61	35.33	1.36	85.67	3.2	0.0653937379881441	1.26904334751297	normal	0.740115533269011	0.471419961570636	normal	0.0850787024810764	1.59361409569996
TRINITY_DN59650_c0_g1	LOC120183404	527	14.23	409	9.17	294	9.58	19	0.28	20	0.66	18	0.37	742	14.52	400	10.6	836	13.1	43	1.2	0	0	135	3.99	364	11.46	178	2.88	180	5.28	410	10.99	19	0.44	659.33	12.74	59.33	1.73	240.67	6.54	0.510819759764776	0.220391057178516	normal	0.127820365318815	-2.54918	normal	0.220165972576706	-0.729079
TRINITY_DN5972_c0_g1	LOC120172805	295	14.21	414	16.12	323	18.07	360	9.39	196	11.42	221	8.08	686	24.52	221	9.94	598	17.15	183	9.26	142	8.13	222	11.99	114	6.6	445	12.79	164	8.79	344	16.13	259	9.63	501.67	17.2	182.33	9.79	241	9.39	0.846946687638625	0.0731735059271157	normal	0.107365248453689	-0.654168	normal	0.0816912944685728	-0.805893
TRINITY_DN6016_c0_g2	LOC120164140	258	5.21	515	9.03	320	10.58	3509	56.92	1303	47.41	2416	54.71	739	14.36	580	15.19	917	14.1	282	8.12	236	8.35	215	6.89	299	9.92	1394	22.18	439	12.76	364.33	8.27	2409.33	53.01	745.33	14.55	244.33	7.79	710.67	14.95	0.0242283786865523	0.64637057015085	normal	0.461243368207303	-0.283313	normal	0.138163351674835	0.66533605311525
TRINITY_DN6065_c0_g1	LOC120150455	374	12.34	543	14.17	254	9.47	409	6.96	193	7.31	282	6.72	373	8.83	192	6.09	613	11.58	266	8.97	159	6.16	242	8.63	174	6.45	299	5.96	182	6.44	390.33	11.99	294.67	7	392.67	8.83	222.33	7.92	218.33	6.28	0.221087873149915	-0.444019	normal	0.195738549416756	-0.514996	normal	0.0194515209522947	-0.93878
TRINITY_DN6087_c1_g1	LOC120206307	711	32.55	1567	57.07	1105	58.14	414	9.98	123	6.51	312	10.51	1157	38.43	532	23.48	1684	44.71	829	39.02	903	49.15	962	48.1	753	39.44	881	24.55	862	42.72	1127.67	49.25	283	9	1124.33	35.54	898	45.42	832	35.57	0.145860197163671	-0.476101	normal	0.909977806587711	-0.0352157	normal	0.191910308071443	-0.479311
TRINITY_DN611_c0_g1	LOC120209242	323	16.09	304	12.13	289	16.88	159	4.16	150	8.58	125	4.53	433	15.56	350	17.18	715	20.7	137	7.19	313	18.61	244	13.21	245	13.74	273	8.35	194	10.33	305.33	15.03	144.67	5.76	499.33	17.81	231.33	13	237.33	10.81	0.480870281885767	0.231333032673427	normal	0.769265823266783	-0.139912	normal	0.31621729509026	-0.46657
TRINITY_DN612_c5_g2	LOC108467292	372	70.99	705	99.58	495	103.36	4279	401.44	1265	281.91	3155	414.26	732	94.57	564	95.43	1230	124.18	380	69.49	1307	275.43	775	152.73	239	52.23	1113	118.4	419	82.03	524	91.31	2899.67	365.87	842	104.73	820.67	165.88	590.33	84.22	0.402334926754015	0.245615371661352	normal	0.0340121911899139	0.967101279708781	normal	0.781197958124438	-0.120526
TRINITY_DN6132_c0_g1	LOC120185675	1672	103.52	2209	107.41	1585	114.48	1778	58.83	483	37.8	1394	66.2	2363	105.22	2010	119.19	3583	122.25	1260	98.33	2135	166.24	3221	232.23	1725	122.95	2833	105.48	1879	132.37	1822	108.47	1218.33	54.28	2652	115.55	2205.33	165.6	2145.67	120.27	0.567856342767361	0.113624799456881	normal	0.105998809641052	0.563364894404155	normal	0.618706891896795	0.109330841527742
TRINITY_DN6161_c0_g1	LOC108467468	494	25.81	557	22.77	443	25.23	1859	49.32	1138	68.05	1429	52.95	678	25.55	575	28.02	695	20.62	424	22.37	420	25.22	268	14.65	536	31.06	913	28.73	376	20.7	498	24.6	1475.33	56.77	649.33	24.73	370.67	20.75	608.33	26.83	0.961408906560995	-0.0135466	normal	0.632047531695974	-0.170977	normal	0.754676339965862	0.110783997509638
TRINITY_DN6232_c0_g2	LOC120205602	384	16.48	545	16.98	204	10.69	1667	38.11	544	27.69	1271	39.37	493	15.24	373	16.48	456	11.46	315	13.73	380	18.63	216	11.87	211	11.08	458	11.95	272	11.84	377.67	14.72	1160.67	35.06	440.67	14.39	303.67	14.74	313.67	11.62	0.755267512820726	-0.109269	normal	0.972845963980882	0.0145138228957259	normal	0.3589757711906	-0.385445
TRINITY_DN6297_c0_g1	--	526	21.79	602	19.66	399	18.78	435	9.24	234	11.16	333	9.93	595	17.67	478	19.02	901	21.21	304	12.89	352	17.28	371	16.41	438	20.42	546	13.61	412	18.15	509	20.08	334	10.11	658	19.3	342.33	15.53	465.33	17.39	0.813371870333512	-0.0627033	normal	0.384242393073391	-0.294422	normal	0.560922234328591	-0.209064
TRINITY_DN6308_c0_g1	LOC120113895	764	42.64	981	42.6	628	39.19	1153	32.65	362	23.06	816	32.4	992	39.35	797	42.43	1357	43.19	473	26.57	449	29.3	550	32.83	513	31.61	1196	39.93	784	46.53	791	41.48	777	29.37	1048.67	41.66	490.67	29.57	831	39.36	0.975587930138676	-0.00681219	normal	0.160097994984552	-0.408968	normal	0.747955742015654	-0.0908507
TRINITY_DN6312_c0_g1	LOC120166111	78	3.79	196	7.52	236	12.76	1906	47.39	847	47.09	1298	45.21	179	6.17	190	8.7	310	8.48	152	7.38	223	12.42	126	6.47	79	4.22	278	8.14	313	16.14	170	8.02	1350.33	46.56	226.33	7.78	167	8.76	223.33	9.5	0.933372781291135	-0.043484	normal	0.712747904903713	0.217918232160794	normal	0.769868420157777	0.206299230240018
TRINITY_DN6363_c0_g1	LOC120118176	1191	165.89	1687	165.77	1214	187.88	1908	148.64	807	134.93	1430	157.9	2574	252.57	2032	269.88	2905	233.46	1306	174.55	1131	174.43	972	129.99	1842	298.34	2391	180.75	1445	221.07	1364	173.18	1381.67	147.16	2503.67	251.97	1136.33	159.66	1892.67	233.39	0.0176748095367427	0.4765442920889	normal	0.984849598043709	0.00476856951088859	normal	0.173000434405029	0.375355423573516
TRINITY_DN6477_c0_g1	LOC108474232	26	1.34	40	1.6	100	5.8	918	24.18	333	19.69	604	22.24	114	4.19	62	3.05	128	3.73	75	3.9	128	7.58	134	7.33	44	2.55	94	2.9	84	4.56	55.33	2.91	618.33	22.04	101.33	3.66	112.33	6.27	74	3.34	0.676445023357908	0.309829740792283	normal	0.126817543696721	1.19146204957315	normal	0.859611741010077	0.165722575190983
TRINITY_DN6505_c0_g1	LOC120177342	161	5.81	285	7.74	145	5.53	996	17.32	412	17.38	735	17.88	346	8.59	312	10.39	405	8.09	285	10.9	209	8.69	308	11.17	0	0	247	5.03	199	7.45	197	6.36	714.33	17.53	354.33	9.02	267.33	10.25	148.67	4.16	0.154524775843433	0.497687543076519	normal	0.0739306960079055	0.745957478187042	normal	0.592527499358544	-0.647606
TRINITY_DN651_c0_g1	LOC120140909	1131	115.66	2841	226.95	1535	178.9	8002	420.34	3641	436.71	6137	451.16	2066	151.42	1238	120.77	3754	217.96	2261	234.22	2536	304.65	2479	275.35	1016	117.72	2597	157.97	1432	156.08	1835.67	173.84	5926.67	436.07	2352.67	163.38	2425.33	271.41	1681.67	143.92	0.789716905978192	-0.0822501	normal	0.0113531226934083	0.727716225681435	normal	0.365660105108594	-0.276698
TRINITY_DN6515_c0_g1	LOC120145518	387	8.94	1278	24.7	1162	31.35	10880	134.21	8302	225.98	7137	123.53	1690	29.14	1232	29.31	2690	35.88	1153	27.52	1461	40.04	1454	36.22	1190	32.04	1712	24.53	1108	30.01	942.33	21.66	8773	161.24	1870.67	31.44	1356	34.59	1336.67	28.86	0.165846680542616	0.533283669182693	normal	0.048093841616789	0.802499096099558	normal	0.37467852491375	0.389209698709537
TRINITY_DN65373_c1_g2	--	71	15.92	177	30.13	135	34.42	890	102.8	347	96.18	640	103.37	97	15.32	179	37.37	227	28.23	199	44.26	67	17.42	209	50.58	337	87.5	247	31.94	120	28.21	127.67	26.82	625.67	100.78	167.67	26.97	158.33	37.42	234.67	49.22	0.9607587664368	0.0268132572532496	normal	0.352562508557299	0.57298111857286	normal	0.195075873020572	0.873930351471413
TRINITY_DN6586_c0_g1	LOC105778564	469	26.02	216	9.7	280	17.87	20	0.6	60	3.94	28	1.18	489	19.37	358	19.41	980	30.8	94	5.46	464	30.27	385	23.62	213	13.79	449	15.02	275	16.74	321.67	17.86	36	1.91	609	23.19	314.33	19.78	312.33	15.18	0.400777015197267	0.366880074575261	normal	0.74210921120827	0.201587480720591	normal	0.584860113740712	-0.278404
TRINITY_DN660_c0_g1	LOC120212103	3856	77.68	9368	149.7	11104	252.65	4639	48.24	3032	69.77	3128	45.52	10884	157.58	8405	163.22	16361	189.09	9208	190.05	11234	265.88	17569	382.81	6094	137.63	11590	141.53	8257	178.6	8109.33	160.01	3599.67	54.51	11883.3	169.96	12670.3	279.58	8647	152.59	0.835370712314556	0.0722431940990521	normal	0.0226356971878344	0.885241115622579	normal	0.813442487909659	-0.0882234
TRINITY_DN660_c0_g2	LOC120212103	888	26.58	1814	42.92	1835	61.95	172	2.65	89	3.04	103	2.22	1733	37.2	942	27.13	2617	44.84	1836	56.04	1667	58.4	3703	119.49	1043	34.99	1298	23.45	903	29	1512.33	43.82	121.33	2.64	1764	36.39	2402	77.98	1081.33	29.15	0.404601299995925	-0.279982	normal	0.0180989088488865	0.918951760478781	normal	0.11601579425468	-0.593947
TRINITY_DN6653_c0_g3	LOC120141725	952	54.33	1086	48.88	564	36.37	158	4.65	58	3.58	118	4.84	1442	58.48	941	50.93	1561	50.62	658	37.87	381	25.29	571	34.83	341	21.89	1546	53.11	737	44.8	867.33	46.53	111.33	4.36	1314.67	53.34	536.67	32.66	874.67	39.93	0.427985389435627	0.199706214213589	normal	0.204570899572587	-0.416663	normal	0.535978426489363	-0.24281
TRINITY_DN6704_c0_g1	LOC105768079	799	17.57	1379	24.06	461	11.62	3548	40.6	1358	34.23	2518	40.27	1049	16.71	704	15	1467	18.67	647	14.82	592	15.57	736	17.91	820	19.81	1514	20.19	704	16.91	879.67	17.75	2474.67	38.37	1073.33	16.79	658.33	16.1	1012.67	18.97	0.776074172223468	-0.0858055	normal	0.824599098762141	-0.0749088	normal	0.758384245989297	0.107289982280824
TRINITY_DN6713_c0_g1	LOC120144147	3252	82.56	5745	122.58	3381	92.51	14880	191.82	5755	172.07	11054	197.25	6158	108.95	4953	124.04	6554	95.06	6171	172.95	4007	123.36	5168	147.93	3633	110.31	8191	124.03	4070	114.6	4126	99.22	10563	187.05	5888.33	109.35	5115.33	148.08	5298	116.31	0.45978236244498	0.149260672370569	normal	0.0100749787515253	0.597882658163952	normal	0.341685374597061	0.196570592828707
TRINITY_DN6843_c0_g1	LOC120137714	122	42.08	591	149.08	789	290.32	283	79.15	75	46.72	211	87.76	599	152.78	869	272.5	1310	239.75	260	106.49	529	200.02	434	167.03	219	87.46	912	180.34	331	134.77	500.67	160.49	189.67	71.21	926	221.68	407.67	157.85	487.33	134.19	0.426044778598122	0.433991080927616	normal	0.931047784317315	-0.0512237	normal	0.550667864823497	-0.388881
TRINITY_DN6845_c0_g1	LOC120113828	1172	32.81	1786	39.59	1321	41.78	1574	22.74	1008	32.32	986	19.94	1838	36.95	1404	37.83	2098	33.65	997	28.56	1175	38.62	1395	42.23	1136	35.7	1517	25.69	1330	39.94	1426.33	38.06	1189.33	25	1780	36.14	1189	36.47	1327.67	33.78	0.686452168379187	-0.0856751	normal	0.949620823185257	0.017499381687641	normal	0.526163563864677	-0.182236
TRINITY_DN6886_c0_g1	LOC120156515	22	1.09	38	1.49	27	1.52	1097	28.14	467	26.81	730	26.21	77	2.74	68	3.24	158	4.48	75	3.8	63	3.67	106	5.7	31	1.74	226	6.76	90	4.79	29	1.37	764.67	27.05	101	3.49	81.33	4.39	115.67	4.43	0.0400064998943141	1.34932626492798	normal	0.0176820919571773	1.76803428763069	normal	0.0579805396165577	1.66890111206341
TRINITY_DN697_c0_g1	LOC120147210	264	5.91	370	6.54	669	16.81	300	3.46	175	4.49	159	2.56	942	15.16	1040	22.31	1247	16.14	923	21.15	680	17.87	791	19.29	354	8.96	1260	17.02	520	12.54	434.33	9.75	211.33	3.5	1076.33	17.87	798	19.44	711.33	12.84	0.0472423180206828	0.842461644958129	normal	0.0161843945485402	1.05140804014499	normal	0.491907367194086	0.353754240968206
TRINITY_DN7027_c0_g1	--	212	8.86	240	7.92	231	10.91	1236	26.67	589	28.34	823	24.83	367	11	316	12.68	325	7.76	201	8.6	227	11.13	297	13.42	178	8.41	426	10.73	243	10.87	227.67	9.23	882.67	26.61	336	10.48	241.67	11.05	282.33	10	0.656571708760183	0.166567177751201	normal	0.441402382801521	0.333008183054402	normal	0.830506937770486	0.0935329782257768
TRINITY_DN7075_c1_g1	LOC120181707	141	5.62	293	9.22	102	4.43	854	17.17	482	21.22	618	17.5	263	7.41	233	8.75	373	8.49	150	5.88	209	9.78	201	8.41	58	2.59	280	6.45	167	7.13	178.67	6.42	651.33	18.63	289.67	8.22	186.67	8.02	168.33	5.39	0.374608516988733	0.361190874698952	normal	0.394582557009208	0.424429638937484	normal	0.683204396204862	-0.257412
TRINITY_DN7086_c0_g1	LOC120167233	694	24.05	1005	27.65	397	15.7	5148	92.99	3306	132.72	3825	96.45	888	22.28	612	20.62	1472	29.58	933	33.08	245	9.74	697	25.76	475	18.57	983	20.7	690	25.71	698.67	22.47	4093	107.39	990.67	24.16	625	22.86	716	21.66	0.762007669003714	0.0915335729091021	normal	0.772762993119585	0.129466922518379	normal	0.851798565074728	-0.064033
TRINITY_DN7120_c1_g1	LOC120184045	190	4.58	170	3.25	36	0.98	10	0.12	0	0	11	0.19	232	3.97	175	3.97	284	3.89	84	2.03	3	0.08	41	1.07	137	3.7	453	6.48	168	4.34	132	2.94	7	0.1	230.33	3.94	42.67	1.06	252.67	4.84	0.445303302243114	0.434909531429933	normal	0.169457965232112	-1.36762	normal	0.297497558650786	0.719407024351454
TRINITY_DN7133_c0_g1	LOC108467896	48	2.56	49	2.03	35	2.13	298	8.19	141	8.55	235	9.05	69	2.6	47	2.41	24	0.72	48	2.61	31	1.96	51	2.93	114	6.94	160	5.12	114	6.46	44	2.24	224.67	8.6	46.67	1.91	43.33	2.5	129.33	6.17	0.762264519193748	-0.241347	normal	0.778710297504508	0.230846370667923	normal	0.0324190136740497	1.44696130984918
TRINITY_DN7211_c0_g1	LOC105780532	358	10.58	400	9.35	140	4.67	257	3.9	98	3.29	160	3.41	336	7.14	223	6.31	370	6.24	123	3.76	59	2.04	146	4.68	295	9.77	471	8.43	187	5.94	299.33	8.2	171.67	3.53	309.67	6.56	109.33	3.49	317.67	8.05	0.413307996051691	-0.327799	normal	0.0349282941711721	-1.15329	normal	0.9593701056947	-0.0257988
TRINITY_DN723_c0_g1	--	514	21.5	674	23.64	219	11.1	2046	47.13	902	47.85	1608	53.6	493	15.77	290	12.85	544	14.51	466	21.43	439	24.63	271	14.05	196	8.71	482	13.03	176	7.96	469	18.75	1518.67	49.53	442.33	14.38	392	20.04	284.67	9.9	0.207932463254288	-0.460067	normal	0.87638692720259	0.0656417647556734	normal	0.0555231902565753	-0.890342
TRINITY_DN7231_c0_g1	LOC120154212	174	7.85	286	10.34	83	4.3	1276	30.25	383	20	1044	34.67	183	5.99	220	9.76	182	4.74	201	9.44	159	8.49	363	18.19	214	11.72	142	3.88	209	10.55	181	7.5	901	28.31	195	6.83	241	12.04	188.33	8.72	0.766650085610075	-0.147216	normal	0.153762726545192	0.761895018811702	normal	0.79949098673827	0.163715722140644
TRINITY_DN72470_c0_g1	LOC120206172	46	2.48	101	4.19	89	5.46	763	21.09	464	29.13	498	19.27	90	3.45	145	7.66	159	4.77	176	9.89	165	10.49	168	9.94	50	3.18	218	7.11	141	8.12	78.67	4.04	575	23.16	131.33	5.29	169.67	10.11	136.33	6.14	0.523931477738021	0.372565789984284	normal	0.0129049740989756	1.37373294132593	normal	0.449320055304406	0.553365061406365
TRINITY_DN725_c0_g1	LOC120173597	350	7.87	482	8.39	249	5.36	270	2.87	113	2.72	131	1.85	406	7.01	297	6.76	530	6.98	283	5.83	238	5.35	227	6.19	178	4.63	373	4.25	117	2.46	360.33	7.21	171.33	2.48	411	6.92	249.33	5.79	222.67	3.78	0.480973428041634	-0.209469	normal	0.521673261969397	-0.23701	normal	0.0540050505674054	-0.879586
TRINITY_DN72561_c0_g1	LOC120142047	79	27.09	327	83.32	248	97.46	141	24.88	26	11.56	117	28.85	172	41.06	77	24.43	302	56.39	109	36.7	388	153.45	404	149.35	0	0	390	75.22	245	86.92	218	69.29	94.67	21.76	183.67	40.63	300.33	113.17	211.67	54.05	0.193287084969884	-0.735789	normal	0.207348180622773	0.789397335159832	normal	0.774404104757012	-0.354682
TRINITY_DN7298_c1_g1	LOC111287528	689	43.02	514	26.26	237	17.05	3314	103.67	1477	93.08	2304	99.52	784	36.08	515	28.92	670	21.13	900	56.28	384	26.64	680	47.21	512	47.49	825	27.43	438	32.73	480	28.78	2365	98.76	656.33	28.71	654.67	43.38	591.67	35.88	0.873978821513879	0.0618953614677333	normal	0.112056601628379	0.698788819454581	normal	0.705408399382855	0.168755663596228
TRINITY_DN7417_c0_g1	LOC120175418	206	7.09	357	11.33	184	7.68	1412	26.94	524	22.37	992	25.82	332	8.9	279	9.21	395	8.14	404	16.08	316	13.06	305	12.31	573	27.17	497	11.67	172	7.55	249	8.7	976	25.04	335.33	8.75	341.67	13.82	414	15.46	0.838877571237996	0.0676136270366153	normal	0.0424123227301121	0.758588676985043	normal	0.205736683610588	0.720301818116142
TRINITY_DN7430_c0_g1	LOC120150051	226	68.77	581	132.05	128	44.41	1775	278.07	922	358.33	1355	296.73	464	98.68	288	80.56	411	68.48	876	261.14	321	112.68	448	147.01	187	66.78	509	87.68	266	84.12	311.67	81.74	1350.67	311.04	387.67	82.57	548.33	173.61	320.67	79.53	0.936259508253755	0.035541060519651	normal	0.0174089939719325	1.17849228969971	normal	0.930485534946382	-0.0466076
TRINITY_DN7508_c0_g2	LOC120142047	32	23.17	85	42.76	99	82.77	21	7.8	0	0	15	7.78	69	33.71	52	32.6	96	36.16	106	71.06	77	62.91	302	234.9	0	0	125	47.05	29	20.92	72	49.57	12	5.19	72.33	34.16	161.67	122.96	51.33	22.66	0.495002943501863	-0.460021	normal	0.055526697594022	1.40691238475649	normal	0.469279085361316	-1.03035
TRINITY_DN751_c0_g1	LOC120218795	832	35.42	834	28.56	361	17.51	816	18.5	219	11.06	586	18.68	745	23.48	541	22.84	696	17.7	518	23.25	438	22.93	380	18.26	461	23.07	1462	38.99	630	30	675.67	27.16	540.33	16.08	660.67	21.34	445.33	21.48	851	30.69	0.229863302088123	-0.399031	normal	0.394953743977926	-0.312464	normal	0.776672859603222	0.110098682035978
TRINITY_DN752_c0_g1	LOC120138071	493	29.81	779	37.04	600	41.03	3585	111.84	2293	160.78	2596	113.32	717	31.03	699	40.46	936	32.25	832	51.21	539	38.19	668	43.67	419	28.58	1015	36.83	581	37.54	624	35.96	2824.67	128.65	784	34.58	679.67	44.36	671.67	34.32	0.815035568438052	-0.0636486	normal	0.214866288587907	0.381532448094892	normal	0.791938028681573	-0.0832328
TRINITY_DN7567_c0_g1	LOC120196803	524	22.67	993	34.24	670	32.45	2355	52.37	1105	55.36	1630	50.69	1168	36.3	695	28.73	1541	38.44	799	35.38	841	42.55	880	40.95	258	12.9	1393	36.32	467	21.82	729	29.79	1696.67	52.81	1134.67	34.49	840	39.63	706	23.68	0.448751224998029	0.203537781020928	normal	0.0929541219839413	0.496421800656531	normal	0.407249061420168	-0.362827
TRINITY_DN7579_c0_g1	LOC110411228	693	31.51	808	30.58	515	27.45	6855	168.4	2516	135.12	4910	169.11	883	30.47	726	31.99	1053	28.65	952	44.05	499	27.84	740	38.21	177	8.87	952	27.91	962	49.24	672	29.85	4760.33	157.54	887.33	30.37	730.33	36.7	697	28.67	0.990595943448531	0.00285357191784555	normal	0.237244076716973	0.378135681887095	normal	0.811000572812856	-0.1252
TRINITY_DN7688_c0_g1	LOC105803320	218	7.21	378	10.82	154	6.36	1032	18.88	549	23.3	683	17.18	404	9.97	248	8.09	407	8.15	175	6.25	128	5.88	132	5.59	194	7.59	388	8.16	240	9.57	250	8.13	754.67	19.79	353	8.74	145	5.91	274	8.44	0.700296252330024	0.136703318838644	normal	0.307908158276044	-0.466247	normal	0.941621163697632	0.032234351159447
TRINITY_DN7698_c0_g1	LOC120141775	5780	480.66	6307	404.56	4473	410.63	2759	95.62	1024	70.39	1907	90.69	7335	425.94	5105	412.54	8978	435.31	3101	247.21	3424	320.25	3441	258	4302	413.16	7938	393.91	4423	371.62	5520	431.95	1896.67	85.57	7139.33	424.6	3322	275.15	5554.33	392.9	0.737839197810433	-0.0614505	normal	0.0390818212643535	-0.463695	normal	0.433090850504619	-0.151833
TRINITY_DN77097_c0_g1	LOC120159496	223	8.61	121	3.26	101	3.66	25	0.5	37	1.64	13	0.36	161	3.97	191	7.09	347	6.48	81	2.66	58	2.63	105	4.05	172	6.72	219	4.01	119	3.92	148.33	5.18	25	0.83	233	5.85	81.33	3.11	170	4.88	0.723192861532589	0.179070374609349	normal	0.303938576310871	-0.644287	normal	0.930267088009362	0.0544505434295446
TRINITY_DN77293_c0_g1	--	28	1.29	25	0.84	84	4.03	18	0.38	0	0	7	0.24	44	1.45	18	0.88	52	1.27	59	2.61	66	3.19	59	2.71	0	0	39	1.01	71	3.87	45.67	2.05	8.33	0.21	38	1.2	61.33	2.84	36.67	1.63	0.322404968475146	-0.884144	normal	0.524451534370105	0.558544591769791	normal	0.703821993356957	-0.594247
TRINITY_DN7754_c0_g1	LOC120194399	285	14.02	807	30.58	415	23.12	6482	169.39	2560	149.5	4532	165.46	741	26.03	486	22.65	1173	32.69	408	20.97	356	20.38	255	14.01	304	16.11	1537	45.07	896	46.89	502.33	22.57	4524.67	161.45	800	27.12	339.67	18.45	912.33	36.02	0.438963315449131	0.266435119793287	normal	0.553281310441495	-0.240208	normal	0.166734208704688	0.659113024742226
TRINITY_DN7877_c1_g1	LOC120128381	1758	90.64	2057	83.54	1235	70.99	6528	172.17	2342	137.9	4771	176.27	2155	78.78	1521	75.1	2990	87.86	1624	82.96	1334	79.26	1715	93.3	1618	93.82	1985	61.48	1214	66.94	1683.33	81.72	4547	162.11	2222	80.58	1557.67	85.17	1605.67	74.08	0.890758609406954	-0.0289889	normal	0.504073122215716	0.164864094295393	normal	0.612410075820622	-0.147642
TRINITY_DN794_c2_g1	--	478	27.54	612	27.89	557	36.49	2917	87.19	915	61.4	2088	87.32	779	32.31	535	29.68	929	30.62	431	25.42	445	30.21	551	34.51	415	27.11	1104	38.4	581	35.97	549	30.64	1973.33	78.64	747.67	30.87	475.67	30.05	700	33.83	0.995841207305146	-0.00140295	normal	0.892278545537875	0.045101804356152	normal	0.715985253885667	0.120675958518263
TRINITY_DN7976_c0_g1	--	653	17.26	1081	23.01	1333	38.14	638	8.95	208	6.55	413	8.2	953	18.7	784	19.79	2048	30.01	696	18.89	1069	32.51	1447	44.17	624	19.06	1266	21.84	656	19.29	1022.33	26.14	419.67	7.9	1261.67	22.83	1070.67	31.86	848.67	20.06	0.542070743946283	-0.221899	normal	0.450201896966517	0.304298779298134	normal	0.197800684160132	-0.492331
TRINITY_DN8037_c2_g1	--	122	6.04	272	10.12	148	8.19	84	2.05	44	2.4	58	1.98	163	5.55	79	3.55	225	6.25	152	7.3	44	2.43	153	8.06	59	3.24	169	4.79	211	10.66	180.67	8.12	62	2.14	155.67	5.12	116.33	5.93	146.33	6.23	0.156002706672026	-0.647273	normal	0.574122842107624	-0.343746	normal	0.559475582575748	-0.380343
TRINITY_DN8038_c0_g1	LOC120179407	372	10.65	457	10.33	353	11.38	475	6.96	167	5.39	382	7.85	244	4.99	345	9.43	669	10.89	270	7.83	253	8.54	265	8.14	310	9.9	576	9.9	253	7.72	394	10.79	341.33	6.73	419.33	8.44	262.67	8.17	379.67	9.17	0.339035251306218	-0.358574	normal	0.357515485315394	-0.323686	normal	0.52433196791388	-0.235635
TRINITY_DN80508_c1_g1	--	88	33.88	132	39.39	96	42.07	679	127.39	332	163.27	504	131.34	178	47.81	185	63.67	177	36.58	127	45.79	134	61.25	129	51.74	0	0	308	64.7	193	77.27	105.33	38.45	505	140.67	180	49.35	130	52.93	167	47.32	0.360625980478875	0.423044318718754	normal	0.267783919553576	0.580383743667346	normal	0.793804240520745	0.334358290028439
TRINITY_DN8114_c0_g1	--	1549	56.38	933	24.85	863	34.01	237	4.44	75	2.18	172	4.81	1114	33.93	574	21.38	1123	26.25	1038	38.82	1242	52.38	1080	43.74	627	23.52	1323	31.46	699	30.62	1115	38.41	161.33	3.81	937	27.19	1120	44.98	883	28.53	0.0287336927839331	-0.734767	normal	0.494793188033839	0.237219193763736	normal	0.123433554237709	-0.557951
TRINITY_DN8227_c0_g2	LOC120203439	122	7.44	414	21.12	126	10.66	4581	160.46	1291	101.38	3581	173.99	349	17.66	247	19.33	254	9.58	455	27.77	173	14.72	152	10.62	35	1.73	539	23.58	450	29.14	220.67	13.07	3151	145.28	283.33	15.52	260	17.7	341.33	18.15	0.823506366307838	0.10654107064134	normal	0.304470001373299	0.587144948092437	normal	0.539439897053162	0.49163697903089
TRINITY_DN8245_c0_g1	LOC111312416	143	7.73	24	1.02	20	1.22	12	0.33	0	0	0	0	148	5.73	31	1.61	29	0.89	47	2.59	17	1.08	20	1.17	26	1.58	70	2.27	54	3.12	62.33	3.32	4	0.11	69.33	2.74	28	1.61	50	2.32	0.749078859597973	-0.318547	normal	0.351203584384131	-0.997452	normal	0.60921832821514	-0.559288
TRINITY_DN8329_c0_g1	LOC120159602	186	7.04	477	14.6	165	6.97	1105	22	532	23.48	796	22.23	272	7.48	209	7.75	640	14.06	197	7.87	222	10.17	218	9.18	96	4.15	565	13.26	307	12.84	276	9.54	811	22.57	373.67	9.76	212.33	9.07	322.67	10.08	0.938932905391769	0.0336616512022845	normal	0.979825592667572	-0.0115954	normal	0.950040339658988	0.036700524647492
TRINITY_DN8361_c1_g1	LOC120195234	198	18.8	572	42.39	623	66.99	252	12.34	69	7.7	209	14.32	269	18.22	454	41.03	792	42.61	291	27.98	546	60.62	925	94.94	95	10.23	812	45.88	294	29.71	464.33	42.73	176.67	11.45	505	33.95	587.33	61.18	400.33	28.61	0.497917081997246	-0.3308	normal	0.253247352616037	0.603023868418153	normal	0.343226912639011	-0.604709
TRINITY_DN8374_c0_g1	LOC120113830	133	7.19	230	8.6	298	17.85	1035	23.58	637	34.49	755	24.21	352	13.18	128	6.63	268	7.68	52	2.86	178	11.28	111	5.44	93	3.18	228	6.24	121	6.99	220.33	11.21	809	27.43	249.33	9.16	113.67	6.53	147.33	5.47	0.521675419425652	-0.316939	normal	0.270282017215157	-0.70252	normal	0.151090299931798	-0.830913
TRINITY_DN8414_c1_g1	LOC120206316	22	1.02	139	5.08	22	1.15	1043	24.94	383	20.47	721	24.13	116	3.85	43	1.91	78	2.06	173	8.18	47	2.55	209	10.47	103	5.37	76	2.12	71	3.52	61	2.42	715.67	23.18	79	2.61	143	7.07	83.33	3.67	0.870171679382262	0.133497833479045	normal	0.0432594131708312	1.66719222025454	normal	0.508762492222162	0.637476956378987
TRINITY_DN8425_c0_g1	LOC110429492	245	24.31	436	33.73	437	49.1	1559	79.78	664	77.53	1130	80.9	391	27.66	468	44.15	945	53.07	260	26.1	706	81.87	420	45.03	198	22.3	735	43.34	549	57.94	372.67	35.71	1117.67	79.4	601.33	41.63	462	51	494	41.19	0.571586539342525	0.220674862896534	normal	0.220482287071509	0.586110042143462	normal	0.715350587209469	0.179197806170757
TRINITY_DN8465_c0_g1	LOC120154298	246	9.63	305	8.73	129	5.21	1174	25.94	685	33.03	840	26.54	334	9.22	194	8.14	299	6.64	153	5.72	115	6.15	183	9.03	0	0	374	8.96	82	3.55	226.67	7.86	899.67	28.5	275.67	8	150.33	6.97	152	4.17	0.812764057068572	-0.0926871	normal	0.549008626654085	-0.289109	normal	0.385345368950573	-1.05287
TRINITY_DN8508_c0_g1	LOC120154367	758	24.07	791	21.76	648	28.54	3825	73.85	1035	46.3	2760	75.29	998	23.56	927	31.13	1139	24.29	912	32.21	703	30.18	665	23.88	388	13.44	2002	41.74	1092	38.68	732.33	24.79	2540	65.15	1021.33	26.33	760	28.76	1160.67	31.29	0.764782901885314	0.0782065171580761	normal	0.307118664819275	0.29682442540308	normal	0.361861597766322	0.37629638916647
TRINITY_DN8571_c0_g1	--	808	98.98	1159	110.16	694	96.35	1059	66.9	439	63.87	760	67.17	1507	131.32	1288	149.45	1573	108.66	283	34.95	812	116.11	983	130.12	946	132.03	1941	140.53	917	119.18	887	101.83	752.67	65.98	1456	129.81	692.67	93.73	1268	130.58	0.131676165282952	0.350637627251574	normal	0.928693630353396	-0.039427	normal	0.165554124013591	0.351242983381238
TRINITY_DN8630_c1_g1	LOC120168511	1201	56.55	990	36.76	660	35.14	1119	27.2	414	22.48	815	27.72	962	32.47	671	30.32	1011	27.2	525	25.23	429	23.7	543	27.66	1020	54.07	1050	29.78	411	20.71	950.33	42.82	782.67	25.8	881.33	30	499	25.53	827	34.85	0.065409773477764	-0.530217	normal	0.0402187013720269	-0.675824	normal	0.513972106657278	-0.291446
TRINITY_DN8707_c0_g1	LOC111291744	1471	45.07	1983	46.06	1012	35.26	1884	29.84	602	20.89	1393	30.67	1604	35.7	1064	30.98	1911	31.71	976	29.99	1046	37.35	844	25.65	1011	31.33	2091	38.94	1032	34.6	1488.67	42.13	1293	27.13	1526.33	32.8	955.33	31	1378	34.96	0.097585079451004	-0.363717	normal	0.20774479926742	-0.338077	normal	0.291568977582468	-0.262901
TRINITY_DN8709_c0_g1	LOC120127669	653	25.52	458	14.12	352	15.55	249	5.02	150	6.73	215	6.06	498	13.95	273	10.26	427	9.53	301	11.99	238	10.92	214	9.03	534	23.48	629	14.8	277	11.59	487.67	18.4	204.67	5.94	399.33	11.25	251	10.65	480	16.62	0.0448131299943526	-0.731018	normal	0.0735551840003052	-0.724112	normal	0.74984526254888	-0.148697
TRINITY_DN87590_c0_g1	LOC120198686	19	31.59	46	48.75	33	64.14	2	1.69	0	0	2	2.37	18	19.37	58	77.23	34	27.09	51	72.96	17	31.01	24	42.68	0	0	48	37.14	62	97.22	32.67	48.16	1.33	1.35	36.67	41.23	30.67	48.88	36.67	44.79	0.928567909038553	-0.0828701	normal	0.870010266710618	0.164771904028373	normal	0.996526099238335	-0.00687672
TRINITY_DN8818_c0_g1	LOC120209298	435	21.36	579	22.9	237	13.18	160	4.12	89	5.14	118	4.23	527	18.51	481	22.61	781	21.88	105	5.24	176	10.3	210	11.31	212	12.02	421	12.37	232	12.3	417	19.15	122.33	4.5	596.33	21	163.67	8.95	288.33	12.23	0.651101501628598	0.143660763233062	normal	0.0282199707952241	-1.01855	normal	0.106223089902372	-0.654184
TRINITY_DN8881_c1_g1	LOC108464175	28	1.43	73	3.12	96	6.21	832	23.26	271	17.54	511	19.92	53	2.04	73	3.56	48	1.57	160	8.73	105	6.6	131	7.87	0	0	59	1.81	42	2.44	65.67	3.59	538	20.24	58	2.39	132	7.73	33.67	1.42	0.483247943775948	-0.534916	normal	0.0719403362601783	1.21902070075031	normal	0.355117751829662	-1.32165
TRINITY_DN8882_c1_g1	LOC120207504	111	3.97	138	3.9	90	3.64	639	13.12	337	15.9	402	11.5	60	1.72	82	3.5	148	3.03	46	1.68	43	1.81	41	1.59	66	3.3	131	3.14	82	3.9	113	3.84	459.33	13.51	96.67	2.75	43.33	1.69	93	3.45	0.220167866407288	-0.648861	normal	0.0826070820360377	-1.10773	normal	0.474915645000109	-0.430756
TRINITY_DN8901_c0_g1	LOC108484059	797	40.71	815	31.93	489	27.16	354	8.79	145	8.14	234	7.96	647	24.07	611	29.6	692	19.62	488	23.76	288	16.57	325	17.9	187	11.77	596	17.88	481	25.41	700.33	33.27	244.33	8.3	650	24.43	367	19.41	421.33	18.35	0.104851735775431	-0.47677	normal	0.0518757197441893	-0.67412	normal	0.029481796684626	-0.907282
TRINITY_DN8943_c0_g1	LOC120190836	421	15.24	313	8.88	291	11.82	403	7.49	153	6.27	275	7.15	521	13.43	160	5.58	561	11.51	297	11.01	224	9.46	95	3.7	486	19.65	420	9.1	342	13.23	341.67	11.98	277	6.97	414	10.17	205.33	8.06	416	13.99	0.553986057761824	-0.252737	normal	0.308267040388944	-0.517975	normal	0.647137560791179	0.220161168212117
TRINITY_DN8983_c0_g1	LOC108476408	1042	58.66	698	30.93	442	28.14	483	14.03	277	18.06	344	13.98	949	38.26	687	37.05	1178	37.81	407	23.34	401	26.46	369	22.46	684	43.41	835	28.24	427	25.7	727.33	39.24	368	15.36	938	37.71	392.33	24.09	648.67	32.45	0.824964272919709	-0.074959	normal	0.0997455500794055	-0.639055	normal	0.52324176835225	-0.279719
TRINITY_DN90036_c0_g1	LOC111291776	393	8.75	681	12.21	635	15.01	2443	25.96	1551	37.22	1732	25.42	511	7.44	585	11.85	554	6.59	356	7.46	439	10.68	613	13.5	338	7.9	776	9.97	167	3.64	569.67	11.99	1908.67	29.53	550	8.63	469.33	10.55	427	7.17	0.240435796290313	-0.417239	normal	0.965356894716304	-0.0168723	normal	0.156644306277597	-0.686953
TRINITY_DN91_c0_g1	--	5060	202.75	5242	153.3	5236	177.65	1345	40.63	649	36.25	930	40.58	7506	186.19	5481	182.6	9154	185.01	6801	178.21	5319	164.05	6049	209.78	4960	202.15	5913	110.12	4987	165.86	5179.33	177.9	974.67	39.15	7380.33	184.6	6056.33	184.01	5286.67	159.38	0.803447418431707	0.0535840220909161	normal	0.0566358092726902	0.453341557147382	normal	0.789263149813312	-0.0743179
TRINITY_DN9124_c0_g1	--	1988	198.25	1730	135.8	970	111.31	9627	516.44	4694	558.32	6919	521.85	2064	148.73	1408	133.78	2433	137.53	781	78.17	826	98.17	794	85.83	980	113.7	2237	135.09	991	108.1	1562.67	148.45	7080	532.2	1968.33	140.01	800.33	87.39	1402.67	118.96	0.740035295054279	-0.0903401	normal	0.0263332861571126	-0.691412	normal	0.256780470868443	-0.35634
TRINITY_DN913_c0_g1	--	58	1.22	129	2.15	181	4.3	985	11.57	727	19.84	692	11.75	315	4.76	75	1.52	237	2.84	189	4.08	46	1.12	37	0.83	79	2.99	307	4.06	232	5.22	122.67	2.56	801.33	14.39	209	3.04	90.67	2.01	206	4.09	0.704397958841704	0.235707884744444	normal	0.728409450351959	-0.275798	normal	0.495310012855976	0.483737868939744
TRINITY_DN9230_c0_g1	LOC120134254	781	69.8	1224	85.49	1155	116.76	522	24.02	136	14.42	371	23.87	1928	123.15	1600	136.2	2855	145.13	313	28.34	602	62.84	656	63.26	890	90.19	1466	78.09	839	79.82	1053.33	90.68	343	20.77	2127.67	134.83	523.67	51.48	1065	82.7	0.0309524764579149	0.564962063582625	normal	0.057612375585486	-0.738541	normal	0.646084971452344	-0.143592
TRINITY_DN9323_c0_g2	LOC120198600	1591	72.48	1417	50.94	940	48.79	1647	38.89	552	29.46	1120	37.07	1375	44.25	769	33.69	1180	31.31	973	46.59	771	43.03	1022	50.44	1025	51.17	1929	53.33	914	44.95	1316	57.4	1106.33	35.14	1108	36.42	922	46.69	1289.33	49.82	0.0169814325775741	-0.66958	normal	0.383659888329449	-0.256733	normal	0.48177737598237	-0.207454
TRINITY_DN93570_c0_g1	LOC120218608	121	16.09	100	10.3	228	34.38	1719	117.89	539	85.49	1158	111.09	185	17.48	269	33.83	256	19.17	325	43.5	305	47.32	327	46.99	110	16.7	315	24.7	134	18.89	149.67	20.26	1138.67	104.82	236.67	23.49	319	45.94	186.33	20.1	0.711310628859294	0.205457295460921	normal	0.0170199691148909	1.25200409547069	normal	0.960409654829755	-0.0325075
TRINITY_DN9391_c0_g2	LOC120145751	278	23.62	563	37.41	696	66.93	143	6.27	34	3.38	173	10.61	341	20.68	375	30.37	529	25.5	310	26.71	1113	110.63	1089	100	77	7.41	723	36.64	286	25.89	512.33	42.65	116.67	6.75	415	25.52	837.33	79.11	362	23.31	0.071783668839758	-0.747762	normal	0.063563536107317	0.966942748523749	normal	0.149163938723501	-0.903761
TRINITY_DN941_c0_g1	LOC120130471	19	0.63	133	3.77	36	1.73	1033	16.78	378	12.76	597	13.31	98	1.7	157	4.48	128	2.59	44	1.23	135	4.88	46	1.36	53	2.59	200	3.39	43	1.54	62.67	2.04	669.33	14.28	127.67	2.92	75	2.49	98.67	2.51	0.242873881481185	0.853626638224808	normal	0.422509441102697	0.715730261131723	normal	0.617707493348873	0.471351721546546
TRINITY_DN9431_c1_g1	LOC120178365	286	7.84	387	9.1	286	8.56	216	2.96	49	1.15	111	2.07	368	7.68	268	7.01	312	5.73	361	8.63	278	8.47	123	4.09	337	11.26	386	6.19	235	6.84	319.67	8.5	125.33	2.06	316	6.81	254	7.06	319.33	8.1	0.231611505663101	-0.399685	normal	0.871800086244791	-0.0757912	normal	0.845110980404452	-0.084188
TRINITY_DN9452_c0_g1	LOC120150988	911	28.29	959	24.82	545	19.35	1018	17.98	349	14.62	777	19.52	1121	24.86	640	18.68	1310	24.74	658	22.8	349	12.26	462	16.84	769	27.12	994	18.69	390	12.6	805	24.15	714.67	17.37	1023.67	22.76	489.67	17.3	717.67	19.47	0.745838453412567	-0.0871473	normal	0.181490676489766	-0.456088	normal	0.486958463653266	-0.275784
TRINITY_DN9454_c0_g1	LOC120133187	141	7.06	165	6.31	279	15.62	32	0.75	31	1.63	8	0.26	169	5.98	152	7.56	301	8.67	167	8.71	206	12.03	88	4.89	240	13.71	244	7.07	125	6.79	195	9.66	23.67	0.88	207.33	7.4	153.67	8.54	203	9.19	0.374580646660991	-0.435926	normal	0.797269275963475	-0.150558	normal	0.879640656578587	-0.0951408
TRINITY_DN9464_c1_g1	LOC120205937	134	26.93	287	44.02	286	65.32	2063	213.67	501	123.34	1396	202.21	169	23.98	338	63.51	271	30.32	310	62.03	318	74.22	272	59.02	69	16	406	47.33	184	38.89	235.67	45.42	1320	179.74	259.33	39.27	300	65.09	219.67	34.07	0.697520801783897	-0.198078	normal	0.185076863898777	0.600537638926189	normal	0.492702487932877	-0.426692
TRINITY_DN9636_c0_g1	LOC120128907	334	18.98	563	25.17	512	32.89	304	8.91	233	15.33	221	9.07	552	22.45	317	17.25	688	22.28	307	17.76	257	17.11	378	23.22	271	17.36	658	22.45	356	21.62	469.67	25.68	252.67	11.1	519	20.66	314	19.36	428.33	20.48	0.325275814978002	-0.321019	normal	0.393197569025087	-0.327211	normal	0.373063122528328	-0.343003
TRINITY_DN9665_c0_g1	LOC108453097	398	15.79	338	10.16	281	14.6	1174	24.99	735	34.52	890	25.97	548	15.82	195	8.26	579	13.67	376	15.06	187	9.06	269	12.29	261	12.39	622	15.42	328	15.66	339	13.52	933	28.49	440.67	12.58	277.33	12.14	403.67	14.49	0.747957854066833	-0.12522	normal	0.874997427241924	-0.0658776	normal	0.9335855519831	0.0326937006431489
TRINITY_DN9699_c0_g2	LOC120199646	326	10.86	149	3.93	219	8.24	50	0.86	0	0	50	1.2	256	6.13	115	3.68	292	5.57	145	4.94	183	7.16	298	10.74	231	8.64	169	3.4	106	3.79	231.33	7.68	33.33	0.69	221	5.13	208.67	7.61	168.67	5.28	0.214237909095875	-0.611378	normal	0.927134494807147	0.0503187948076709	normal	0.411115572923929	-0.544759
TRINITY_DN9710_c0_g1	--	41	2.23	15	0.62	92	5.78	396	11.24	260	16.83	317	12.59	66	2.62	2	0.11	65	2.08	77	4.33	21	1.38	72	4.21	0	0	73	2.36	62	3.71	49.33	2.88	324.33	13.55	44.33	1.6	56.67	3.31	45	2.02	0.428583127361273	-0.8918	normal	0.784706924419538	0.268935868539042	normal	0.705700637958558	-0.58234
TRINITY_DN9729_c0_g1	--	606	31.65	557	22.91	679	40.14	687	18.51	305	18.41	467	17.61	738	27.61	677	33.89	916	27.32	231	12.3	276	16.9	303	17.11	362	21.3	456	14.32	121	6.76	614	31.57	486.33	18.18	777	29.61	270	15.44	313	14.13	0.723565499800206	-0.11057	normal	0.0117819373751552	-0.963649	normal	0.0261087615469936	-1.15918
TRINITY_DN977_c0_g1	LOC120171590	497	20.36	802	26.67	606	27.99	2712	58.14	1048	52.48	1898	56.04	860	22.78	638	24.79	955	20.75	624	23.5	582	27.19	436	18.89	614	27.99	853	20.28	544	23.49	635	25.01	1886	55.55	817.67	22.77	547.33	23.19	670.33	23.92	0.873017043548608	-0.0411463	normal	0.86202912824234	0.0555533972861894	normal	0.934625179777409	-0.027156
TRINITY_DN9800_c0_g1	LOC120198237	45	2.27	133	5.43	141	8.24	714	18.29	254	14.48	408	14.72	249	8.98	161	7.8	70	1.96	72	3.72	94	5.5	137	7.62	0	0	379	11.38	60	3.23	106.33	5.31	458.67	15.83	160	6.25	101	5.61	146.33	4.87	0.706364736698069	0.257671073806801	normal	0.785973038140618	0.185358574305266	normal	0.928264380731846	-0.122462
TRINITY_DN9823_c0_g1	LOC120140327	227	8.01	428	10.33	203	5.8	320	5.68	79	4.03	209	4.9	335	8.03	361	9.97	511	10.25	130	4.35	240	9.95	223	6.96	342	10.91	599	11.53	223	6.68	286	8.05	202.67	4.87	402.33	9.42	197.67	7.09	388	9.71	0.674304862392413	0.143786720645871	normal	0.678632915834695	-0.193234	normal	0.473448672713669	0.314577822548919
TRINITY_DN9956_c0_g1	LOC110411870	156	62.4	446	130.99	218	99.86	1191	245.2	922	489.58	870	250.13	319	88.38	210	76.41	349	75.31	418	161.44	279	127.96	340	146.55	537	255.97	636	141.16	144	59.24	273.33	97.75	994.33	328.3	292.67	80.03	345.67	145.32	439	152.12	0.513387717820893	-0.257658	normal	0.117639788335453	0.662365204155967	normal	0.300234814281136	0.622921694398754
TRINITY_DN9997_c0_g1	LOC120174661	2385	48.26	2680	42.33	1644	40.17	8526	89.55	3988	98.63	6000	86.42	3268	48.17	2191	42.61	4074	47.03	2257	58.74	1510	35.36	1830	41.07	1641	35.13	3333	42.29	2004	43.97	2236.33	43.59	6171.33	91.53	3177.67	45.94	1865.67	45.06	2326	40.46	0.692562064473153	0.0805299916392909	normal	0.986066513636776	0.0043258725869591	normal	0.655917078964147	-0.0981219
[truncated: 51 more columns]
