# Supplementary material for: Mechanisms of SNP and melatonin effects on antioxidant and chlorophyll metabolism in postharvest okra
Source: NPJ Sci Food. 2025 Aug 25;9:188. doi: 10.1038/s41538-025-00553-1 (PMC12378788; doi:10.1038/s41538-025-00553-1)
Supplement: Supplementary file 5 — Supplementary Data 4 [file 41538_2025_553_MOESM5_ESM.xlsx]

## Sheet: co
id	name	connectivity	gene_id	kme	module	Total_corr	PPH_corr	PAO_corr	Tchl_corr	RCCR_corr	SOD_corr	NYC1_corr	Chla_corr	CAT_corr	CLH_corr	APX_corr	POD_corr	MDA_corr	Soluble_corr	MDCase_corr	Chlb_corr	HCAR_corr	H2O2_corr
TRINITY_DN1085_c0_g1	TRINITY_DN1085_c0_g1	53.542	TRINITY_DN1085_c0_g1	0.9914	yellow	0.803	0.392	0.412	-0.177	0.103	-0.628	0.461	-0.178	0.148	0.34	0.252	-0.25	0.0025	-0.138	0.207	-0.211	-0.0742	-0.783
TRINITY_DN2368_c0_g1	TRINITY_DN2368_c0_g1	51.5524	TRINITY_DN2368_c0_g1	0.9837	yellow	0.725	0.307	0.29	-0.0403	-0.0259	-0.521	0.309	-0.0408	0.236	0.219	0.38	-0.0937	0.141	0.0299	0.0395	-0.0714	-0.156	-0.668
TRINITY_DN660_c0_g2	TRINITY_DN660_c0_g2	51.4809	TRINITY_DN660_c0_g2	0.9804	yellow	0.792	0.358	0.388	-0.121	0.0664	-0.608	0.412	-0.123	0.188	0.301	0.311	-0.206	0.068	-0.0826	0.144	-0.15	-0.0451	-0.746
TRINITY_DN3772_c0_g1	TRINITY_DN3772_c0_g1	50.0118	TRINITY_DN3772_c0_g1	0.9802	yellow	0.781	0.367	0.44	-0.256	0.189	-0.639	0.497	-0.255	0.107	0.366	0.173	-0.304	-0.0329	-0.175	0.267	-0.286	-0.0869	-0.809
TRINITY_DN21582_c0_g1	TRINITY_DN21582_c0_g1	50.1191	TRINITY_DN21582_c0_g1	0.98	yellow	0.725	0.318	0.321	-0.106	-0.0043	-0.531	0.351	-0.108	0.19	0.246	0.327	-0.119	0.0905	-0.0096	0.101	-0.133	-0.159	-0.705
TRINITY_DN228_c0_g1	TRINITY_DN228_c0_g1	50.5082	TRINITY_DN228_c0_g1	0.9784	yellow	0.71	0.385	0.337	-0.111	-0.0026	-0.479	0.363	-0.114	0.0927	0.321	0.313	-0.108	0.0103	-0.0382	0.0614	-0.135	-0.0821	-0.657
TRINITY_DN18436_c0_g1	TRINITY_DN18436_c0_g1	49.3611	TRINITY_DN18436_c0_g1	0.9749	yellow	0.793	0.353	0.351	-0.0062	0.0659	-0.606	0.363	-0.0046	0.272	0.209	0.399	-0.178	0.111	-0.0482	0.0762	-0.0394	-0.0695	-0.687
TRINITY_DN19693_c0_g1	TRINITY_DN19693_c0_g1	49.5503	TRINITY_DN19693_c0_g1	0.9745	yellow	0.817	0.42	0.432	-0.0853	0.105	-0.617	0.428	-0.0863	0.193	0.298	0.355	-0.202	0.0439	-0.0973	0.123	-0.112	-0.0113	-0.724
TRINITY_DN2740_c0_g2	TRINITY_DN2740_c0_g2	48.1583	TRINITY_DN2740_c0_g2	0.9699	yellow	0.74	0.222	0.266	0.001	0.0366	-0.57	0.293	0.0045	0.338	0.142	0.4	-0.127	0.207	0.0332	0.0447	-0.034	-0.199	-0.67
TRINITY_DN7976_c0_g1	TRINITY_DN7976_c0_g1	46.0949	TRINITY_DN7976_c0_g1	0.965	yellow	0.739	0.323	0.357	-0.133	0.112	-0.567	0.402	-0.132	0.142	0.294	0.258	-0.219	0.0283	-0.105	0.148	-0.161	-0.0663	-0.708
TRINITY_DN34_c2_g1	TRINITY_DN34_c2_g1	44.7649	TRINITY_DN34_c2_g1	0.9603	yellow	0.767	0.275	0.385	-0.22	0.162	-0.645	0.449	-0.219	0.187	0.292	0.199	-0.288	0.0437	-0.127	0.247	-0.252	-0.14	-0.8
TRINITY_DN8242_c1_g1	TRINITY_DN8242_c1_g1	44.7925	TRINITY_DN8242_c1_g1	0.9569	yellow	0.717	0.161	0.243	-0.0799	0.071	-0.591	0.315	-0.0737	0.34	0.155	0.301	-0.183	0.208	0.0038	0.123	-0.122	-0.263	-0.727
TRINITY_DN2680_c0_g1	TRINITY_DN2680_c0_g1	44.5979	TRINITY_DN2680_c0_g1	0.9503	yellow	0.82	0.3	0.351	-0.0187	0.104	-0.682	0.38	-0.0152	0.347	0.18	0.371	-0.25	0.161	-0.0738	0.141	-0.0592	-0.07	-0.741
TRINITY_DN12218_c1_g1	TRINITY_DN12218_c1_g1	43.7397	TRINITY_DN12218_c1_g1	0.9476	yellow	0.886	0.407	0.451	-0.0151	0.189	-0.737	0.456	-0.0127	0.318	0.203	0.397	-0.304	0.0627	-0.15	0.167	-0.0486	0.0411	-0.749
TRINITY_DN11501_c1_g1	TRINITY_DN11501_c1_g1	43.4066	TRINITY_DN11501_c1_g1	0.9434	yellow	0.695	0.421	0.393	-0.292	0.045	-0.488	0.458	-0.296	-0.0478	0.465	0.12	-0.193	-0.0945	-0.159	0.226	-0.315	-0.0837	-0.744
TRINITY_DN6087_c1_g1	TRINITY_DN6087_c1_g1	42.2913	TRINITY_DN6087_c1_g1	0.9407	yellow	0.793	0.508	0.518	-0.274	0.198	-0.626	0.548	-0.275	0.0138	0.441	0.17	-0.314	-0.154	-0.227	0.27	-0.301	0.0508	-0.772
TRINITY_DN1762_c0_g1	TRINITY_DN1762_c0_g1	40.4686	TRINITY_DN1762_c0_g1	0.937	yellow	0.828	0.556	0.569	-0.252	0.269	-0.666	0.586	-0.255	-0.014	0.444	0.169	-0.374	-0.194	-0.299	0.311	-0.27	0.153	-0.778
TRINITY_DN4714_c0_g1	TRINITY_DN4714_c0_g1	42.5968	TRINITY_DN4714_c0_g1	0.9364	yellow	0.833	0.284	0.329	0.0647	0.0931	-0.685	0.348	0.0683	0.402	0.122	0.441	-0.229	0.192	-0.0554	0.0885	0.0255	-0.0338	-0.697
TRINITY_DN1642_c0_g1	TRINITY_DN1642_c0_g1	39.5014	TRINITY_DN1642_c0_g1	0.9358	yellow	0.834	0.351	0.443	-0.203	0.223	-0.716	0.506	-0.202	0.198	0.314	0.204	-0.359	0.0073	-0.211	0.302	-0.232	-0.0369	-0.831
TRINITY_DN68877_c0_g4	TRINITY_DN68877_c0_g4	39.3862	TRINITY_DN68877_c0_g4	0.9356	yellow	0.747	0.21	0.286	-0.0684	0.0384	-0.609	0.325	-0.0666	0.341	0.171	0.33	-0.173	0.223	0.0005	0.135	-0.105	-0.214	-0.739
TRINITY_DN41129_c0_g1	TRINITY_DN41129_c0_g1	39.1505	TRINITY_DN41129_c0_g1	0.9328	yellow	0.692	0.323	0.36	-0.278	0.122	-0.524	0.458	-0.278	-0.0074	0.42	0.0867	-0.26	-0.0819	-0.2	0.247	-0.306	-0.0705	-0.738
TRINITY_DN8114_c0_g1	TRINITY_DN8114_c0_g1	40.145	TRINITY_DN8114_c0_g1	0.9325	yellow	0.81	0.445	0.472	-0.174	0.144	-0.623	0.487	-0.178	0.108	0.348	0.27	-0.255	-0.0666	-0.168	0.195	-0.194	-0.0157	-0.751
TRINITY_DN4909_c0_g1	TRINITY_DN4909_c0_g1	41.191	TRINITY_DN4909_c0_g1	0.9307	yellow	0.72	0.415	0.39	-0.211	0.0294	-0.506	0.429	-0.217	0.02	0.391	0.211	-0.167	-0.0556	-0.121	0.177	-0.228	-0.0515	-0.717
TRINITY_DN519_c0_g2	TRINITY_DN519_c0_g2	40.3404	TRINITY_DN519_c0_g2	0.9284	yellow	0.754	0.545	0.51	-0.272	0.0885	-0.562	0.529	-0.28	-0.0711	0.456	0.162	-0.262	-0.185	-0.223	0.266	-0.292	0.0619	-0.751
TRINITY_DN2017_c0_g1	TRINITY_DN2017_c0_g1	40.5059	TRINITY_DN2017_c0_g1	0.9265	yellow	0.666	0.454	0.343	-0.103	-0.102	-0.404	0.339	-0.111	0.0174	0.342	0.323	-0.0354	-0.0277	-0.0193	0.0389	-0.119	-0.0582	-0.604
TRINITY_DN71851_c0_g1	TRINITY_DN71851_c0_g1	38.9936	TRINITY_DN71851_c0_g1	0.926	yellow	0.729	0.464	0.374	-0.0728	-0.0269	-0.487	0.372	-0.0756	0.0966	0.324	0.345	-0.101	-0.0164	-0.0583	0.0578	-0.1	-0.0266	-0.624
TRINITY_DN660_c0_g1	TRINITY_DN660_c0_g1	38.5815	TRINITY_DN660_c0_g1	0.92	yellow	0.675	0.187	0.182	0.0796	-0.11	-0.471	0.205	0.0809	0.325	0.123	0.439	-0.0295	0.251	0.0888	-0.057	0.0431	-0.144	-0.575
TRINITY_DN6479_c0_g1	TRINITY_DN6479_c0_g1	38.6251	TRINITY_DN6479_c0_g1	0.9189	yellow	0.747	0.251	0.251	0.0809	0.0267	-0.576	0.285	0.0851	0.36	0.113	0.435	-0.146	0.187	-0.0055	0.0196	0.0423	-0.0634	-0.619
TRINITY_DN136089_c0_g1	TRINITY_DN136089_c0_g1	39.9229	TRINITY_DN136089_c0_g1	0.9167	yellow	0.742	0.504	0.455	-0.192	0.0268	-0.506	0.447	-0.201	-0.017	0.436	0.252	-0.165	-0.0904	-0.127	0.14	-0.207	0.027	-0.688
TRINITY_DN91_c0_g1	TRINITY_DN91_c0_g1	39.5619	TRINITY_DN91_c0_g1	0.9166	yellow	0.703	0.436	0.43	-0.229	0.0324	-0.491	0.434	-0.236	-0.0015	0.402	0.225	-0.153	-0.072	-0.0969	0.15	-0.245	-0.0364	-0.696
TRINITY_DN2206_c0_g1	TRINITY_DN2206_c0_g1	94.7549	TRINITY_DN2206_c0_g1	0.9731	turquoise	-0.771	-0.562	-0.553	0.324	-0.143	0.565	-0.568	0.332	0.132	-0.535	-0.12	0.291	0.238	0.268	-0.276	0.339	-0.101	0.756
TRINITY_DN1182_c0_g1	TRINITY_DN1182_c0_g1	86.4055	TRINITY_DN1182_c0_g1	0.9689	turquoise	-0.748	-0.419	-0.44	0.184	-0.0592	0.563	-0.443	0.191	-0.0554	-0.361	-0.247	0.218	0.051	0.13	-0.176	0.2	-0.0266	0.708
TRINITY_DN32836_c0_g1	TRINITY_DN32836_c0_g1	83.4888	TRINITY_DN32836_c0_g1	0.9653	turquoise	-0.744	-0.468	-0.44	0.084	-0.0053	0.505	-0.4	0.0908	-0.0733	-0.318	-0.356	0.116	0.0512	0.0778	-0.055	0.101	0.0101	0.626
TRINITY_DN7754_c0_g1	TRINITY_DN7754_c0_g1	81.4291	TRINITY_DN7754_c0_g1	0.9585	turquoise	-0.765	-0.396	-0.467	0.203	-0.109	0.602	-0.462	0.21	-0.0779	-0.368	-0.222	0.257	0.0198	0.157	-0.217	0.22	-0.0179	0.741
TRINITY_DN2035_c0_g2	TRINITY_DN2035_c0_g2	83.1806	TRINITY_DN2035_c0_g2	0.953	turquoise	-0.796	-0.458	-0.485	0.172	-0.128	0.629	-0.482	0.178	-0.103	-0.334	-0.261	0.266	0.0676	0.172	-0.225	0.19	-0.014	0.734
TRINITY_DN4562_c0_g1	TRINITY_DN4562_c0_g1	78.1528	TRINITY_DN4562_c0_g1	0.9503	turquoise	-0.677	-0.329	-0.274	-0.0289	0.121	0.436	-0.247	-0.0204	-0.189	-0.212	-0.436	0.0112	-0.13	-0.0652	0.0441	-0.0145	0.0508	0.549
TRINITY_DN10678_c0_g1	TRINITY_DN10678_c0_g1	89.0527	TRINITY_DN10678_c0_g1	0.9489	turquoise	-0.619	-0.514	-0.392	0.214	0.0573	0.362	-0.388	0.226	0.135	-0.466	-0.202	0.08	0.148	0.0875	-0.0938	0.223	-0.0129	0.586
TRINITY_DN16142_c0_g1	TRINITY_DN16142_c0_g1	80.6845	TRINITY_DN16142_c0_g1	0.9478	turquoise	-0.817	-0.568	-0.582	0.278	-0.23	0.657	-0.583	0.283	0.0209	-0.471	-0.165	0.367	0.203	0.276	-0.295	0.295	-0.142	0.769
TRINITY_DN26555_c0_g1	TRINITY_DN26555_c0_g1	83.6925	TRINITY_DN26555_c0_g1	0.9457	turquoise	-0.627	-0.415	-0.385	0.225	0.0234	0.394	-0.389	0.235	0.0819	-0.409	-0.195	0.0946	0.11	0.0841	-0.109	0.233	0.0678	0.618
TRINITY_DN5263_c0_g1	TRINITY_DN5263_c0_g1	83.954	TRINITY_DN5263_c0_g1	0.9445	turquoise	-0.704	-0.606	-0.489	0.148	-0.022	0.438	-0.444	0.157	0.102	-0.437	-0.287	0.124	0.204	0.14	-0.0784	0.156	-0.126	0.579
TRINITY_DN104532_c0_g1	TRINITY_DN104532_c0_g1	87.1595	TRINITY_DN104532_c0_g1	0.9443	turquoise	-0.662	-0.594	-0.465	0.24	-0.0009	0.406	-0.452	0.249	0.152	-0.495	-0.195	0.121	0.205	0.14	-0.135	0.252	-0.0407	0.625
TRINITY_DN12947_c0_g1	TRINITY_DN12947_c0_g1	84.7899	TRINITY_DN12947_c0_g1	0.9418	turquoise	-0.694	-0.58	-0.464	0.0759	0.0325	0.432	-0.394	0.0878	0.0316	-0.367	-0.362	0.0834	0.135	0.0834	-0.0256	0.0809	-0.162	0.543
TRINITY_DN27405_c0_g1	TRINITY_DN27405_c0_g1	80.9787	TRINITY_DN27405_c0_g1	0.9413	turquoise	-0.658	-0.53	-0.421	0.158	0.0417	0.402	-0.395	0.168	0.0599	-0.4	-0.283	0.0732	0.115	0.067	-0.0631	0.17	-0.038	0.603
TRINITY_DN6347_c0_g2	TRINITY_DN6347_c0_g2	84.4541	TRINITY_DN6347_c0_g2	0.941	turquoise	-0.76	-0.639	-0.575	0.316	-0.128	0.528	-0.573	0.324	0.173	-0.59	-0.127	0.268	0.272	0.28	-0.246	0.33	-0.176	0.717
TRINITY_DN794_c2_g1	TRINITY_DN794_c2_g1	78.0205	TRINITY_DN794_c2_g1	0.9398	turquoise	-0.692	-0.478	-0.442	0.215	-0.0113	0.506	-0.436	0.224	0.0027	-0.395	-0.202	0.185	0.0837	0.128	-0.196	0.234	-0.0105	0.679
TRINITY_DN6812_c0_g1	TRINITY_DN6812_c0_g1	79.5211	TRINITY_DN6812_c0_g1	0.9385	turquoise	-0.659	-0.496	-0.476	0.339	-0.0666	0.454	-0.487	0.346	0.162	-0.525	-0.0735	0.201	0.174	0.194	-0.248	0.354	0.0421	0.703
TRINITY_DN3276_c0_g3	TRINITY_DN3276_c0_g3	81.0965	TRINITY_DN3276_c0_g3	0.9335	turquoise	-0.694	-0.589	-0.47	0.181	-0.0003	0.44	-0.445	0.192	0.138	-0.497	-0.223	0.162	0.19	0.176	-0.127	0.188	-0.187	0.591
TRINITY_DN8847_c0_g1	TRINITY_DN8847_c0_g1	81.6717	TRINITY_DN8847_c0_g1	0.933	turquoise	-0.685	-0.568	-0.502	0.28	-0.0409	0.457	-0.499	0.29	0.16	-0.492	-0.159	0.183	0.25	0.199	-0.196	0.29	-0.126	0.652
TRINITY_DN2167_c0_g1	TRINITY_DN2167_c0_g1	80.8364	TRINITY_DN2167_c0_g1	0.9328	turquoise	-0.595	-0.439	-0.349	0.178	0.113	0.332	-0.335	0.19	0.0852	-0.422	-0.23	0.0196	0.059	0.0388	-0.056	0.185	0.0343	0.571
TRINITY_DN11384_c0_g2	TRINITY_DN11384_c0_g2	84.2232	TRINITY_DN11384_c0_g2	0.9307	turquoise	-0.618	-0.481	-0.417	0.302	0.0084	0.376	-0.433	0.313	0.169	-0.515	-0.121	0.119	0.175	0.136	-0.155	0.308	-0.0028	0.636
TRINITY_DN10109_c0_g1	TRINITY_DN10109_c0_g1	83.3425	TRINITY_DN10109_c0_g1	0.9305	turquoise	-0.703	-0.59	-0.491	0.241	-0.0464	0.46	-0.489	0.25	0.116	-0.467	-0.205	0.162	0.227	0.176	-0.166	0.252	-0.0741	0.658
TRINITY_DN107501_c0_g1	TRINITY_DN107501_c0_g1	88.5641	TRINITY_DN107501_c0_g1	0.9301	turquoise	-0.647	-0.618	-0.506	0.278	-0.0293	0.405	-0.483	0.291	0.223	-0.526	-0.147	0.161	0.275	0.195	-0.181	0.279	-0.146	0.608
TRINITY_DN18653_c0_g1	TRINITY_DN18653_c0_g1	76.097	TRINITY_DN18653_c0_g1	0.9297	turquoise	-0.742	-0.58	-0.501	0.204	-0.0643	0.498	-0.484	0.211	0.0734	-0.484	-0.236	0.184	0.159	0.181	-0.153	0.217	-0.152	0.663
TRINITY_DN1555_c0_g1	TRINITY_DN1555_c0_g1	75.9547	TRINITY_DN1555_c0_g1	0.9286	turquoise	-0.715	-0.6	-0.47	0.0758	0.032	0.453	-0.408	0.0878	0.0541	-0.421	-0.326	0.128	0.137	0.136	-0.0572	0.0842	-0.205	0.55
TRINITY_DN4091_c0_g2	TRINITY_DN4091_c0_g2	80.7997	TRINITY_DN4091_c0_g2	0.9276	turquoise	-0.761	-0.699	-0.641	0.319	-0.207	0.554	-0.604	0.328	0.19	-0.577	-0.129	0.312	0.31	0.304	-0.274	0.325	-0.245	0.712
TRINITY_DN5242_c0_g1	TRINITY_DN5242_c0_g1	80.9941	TRINITY_DN5242_c0_g1	0.9266	turquoise	-0.7	-0.599	-0.584	0.429	-0.179	0.517	-0.596	0.439	0.261	-0.638	0.0098	0.332	0.303	0.321	-0.346	0.435	-0.165	0.746
TRINITY_DN17465_c0_g2	TRINITY_DN17465_c0_g2	76.0114	TRINITY_DN17465_c0_g2	0.9255	turquoise	-0.831	-0.633	-0.656	0.321	-0.275	0.687	-0.649	0.328	0.0791	-0.491	-0.119	0.422	0.302	0.357	-0.369	0.335	-0.205	0.787
TRINITY_DN752_c0_g1	TRINITY_DN752_c0_g1	84.022	TRINITY_DN752_c0_g1	0.9253	turquoise	-0.63	-0.56	-0.454	0.265	-0.0315	0.385	-0.45	0.276	0.184	-0.484	-0.165	0.129	0.24	0.148	-0.148	0.268	-0.0654	0.601
TRINITY_DN581_c0_g1	TRINITY_DN581_c0_g1	75.9746	TRINITY_DN581_c0_g1	0.9154	turquoise	-0.68	-0.558	-0.472	0.187	-0.0285	0.436	-0.436	0.197	0.068	-0.429	-0.244	0.116	0.14	0.128	-0.126	0.196	-0.0288	0.621
TRINITY_DN4586_c0_g1	TRINITY_DN4586_c0_g1	79.4918	TRINITY_DN4586_c0_g1	0.9088	turquoise	-0.623	-0.626	-0.494	0.242	0.0026	0.368	-0.455	0.254	0.205	-0.503	-0.189	0.116	0.27	0.156	-0.114	0.244	-0.142	0.564
TRINITY_DN7020_c1_g1	TRINITY_DN7020_c1_g1	47.1813	TRINITY_DN7020_c1_g1	0.972	blue	0.268	0.686	0.515	-0.563	0.113	-0.0836	0.506	-0.579	-0.69	0.74	-0.274	-0.17	-0.627	-0.345	0.304	-0.541	0.258	-0.378
TRINITY_DN8559_c0_g1	TRINITY_DN8559_c0_g1	48.2299	TRINITY_DN8559_c0_g1	0.9701	blue	0.389	0.641	0.502	-0.496	0.0477	-0.165	0.504	-0.512	-0.586	0.702	-0.161	-0.148	-0.521	-0.311	0.27	-0.479	0.25	-0.47
TRINITY_DN10213_c1_g1	TRINITY_DN10213_c1_g1	47.3486	TRINITY_DN10213_c1_g1	0.9652	blue	0.327	0.562	0.463	-0.547	0.0777	-0.13	0.475	-0.562	-0.574	0.692	-0.214	-0.137	-0.492	-0.268	0.267	-0.531	0.1	-0.463
TRINITY_DN5943_c0_g1	TRINITY_DN5943_c0_g1	42.0098	TRINITY_DN5943_c0_g1	0.9527	blue	0.317	0.683	0.573	-0.626	0.25	-0.186	0.601	-0.642	-0.702	0.748	-0.369	-0.316	-0.706	-0.488	0.454	-0.602	0.333	-0.451
TRINITY_DN10612_c0_g1	TRINITY_DN10612_c0_g1	46.6882	TRINITY_DN10612_c0_g1	0.9505	blue	0.517	0.732	0.552	-0.381	0.0382	-0.268	0.53	-0.399	-0.492	0.663	-0.0245	-0.178	-0.512	-0.327	0.235	-0.369	0.339	-0.492
TRINITY_DN6516_c0_g1	TRINITY_DN6516_c0_g1	40.9073	TRINITY_DN6516_c0_g1	0.95	blue	0.217	0.613	0.454	-0.509	0.0302	-0.0416	0.44	-0.529	-0.674	0.682	-0.263	-0.134	-0.574	-0.318	0.276	-0.482	0.29	-0.322
TRINITY_DN8113_c1_g1	TRINITY_DN8113_c1_g1	38.889	TRINITY_DN8113_c1_g1	0.9393	blue	0.332	0.683	0.569	-0.639	0.21	-0.183	0.6	-0.654	-0.736	0.809	-0.376	-0.322	-0.705	-0.48	0.423	-0.62	0.357	-0.457
TRINITY_DN274_c0_g1	TRINITY_DN274_c0_g1	46.1643	TRINITY_DN274_c0_g1	0.9346	blue	0.52	0.623	0.512	-0.402	0.0904	-0.301	0.502	-0.416	-0.371	0.596	-0.011	-0.165	-0.389	-0.248	0.243	-0.392	0.137	-0.558
TRINITY_DN7674_c0_g1	TRINITY_DN7674_c0_g1	36.5942	TRINITY_DN7674_c0_g1	0.9296	blue	0.193	0.6	0.43	-0.463	0.0619	-0.014	0.394	-0.481	-0.607	0.61	-0.195	-0.0709	-0.521	-0.238	0.22	-0.431	0.248	-0.282
TRINITY_DN216153_c0_g1	TRINITY_DN216153_c0_g1	37.9345	TRINITY_DN216153_c0_g1	0.9294	blue	0.156	0.692	0.472	-0.51	0.0546	0.0265	0.441	-0.53	-0.764	0.731	-0.299	-0.126	-0.646	-0.354	0.267	-0.478	0.402	-0.241
TRINITY_DN7215_c0_g1	TRINITY_DN7215_c0_g1	36.7961	TRINITY_DN7215_c0_g1	0.9259	blue	0.186	0.534	0.369	-0.604	0.0031	0.0032	0.421	-0.619	-0.705	0.768	-0.356	-0.106	-0.514	-0.281	0.293	-0.589	0.122	-0.389
TRINITY_DN35354_c0_g1	TRINITY_DN35354_c0_g1	37.3019	TRINITY_DN35354_c0_g1	0.9228	blue	0.385	0.803	0.618	-0.437	0.163	-0.191	0.561	-0.455	-0.632	0.678	-0.153	-0.231	-0.688	-0.429	0.301	-0.414	0.438	-0.356
TRINITY_DN5911_c1_g1	TRINITY_DN5911_c1_g1	47.2881	TRINITY_DN5911_c1_g1	0.9191	blue	0.614	0.642	0.552	-0.417	0.109	-0.387	0.557	-0.429	-0.352	0.629	-0.0014	-0.22	-0.389	-0.288	0.28	-0.415	0.141	-0.645
TRINITY_DN199_c0_g1	TRINITY_DN199_c0_g1	41.0016	TRINITY_DN199_c0_g1	0.919	blue	0.498	0.718	0.536	-0.294	0.0459	-0.241	0.484	-0.311	-0.435	0.57	0.0723	-0.124	-0.49	-0.268	0.146	-0.276	0.366	-0.419
TRINITY_DN19176_c1_g2	TRINITY_DN19176_c1_g2	39.1631	TRINITY_DN19176_c1_g2	0.9159	blue	0.373	0.591	0.378	-0.327	-0.0651	-0.105	0.373	-0.342	-0.431	0.555	0.034	0.0028	-0.389	-0.13	0.077	-0.314	0.159	-0.393
TRINITY_DN6807_c0_g1	TRINITY_DN6807_c0_g1	40.1687	TRINITY_DN6807_c0_g1	0.9147	blue	0.492	0.637	0.579	-0.628	0.261	-0.323	0.647	-0.638	-0.579	0.776	-0.295	-0.344	-0.586	-0.464	0.45	-0.621	0.197	-0.64
TRINITY_DN13986_c0_g1	TRINITY_DN13986_c0_g1	37.3731	TRINITY_DN13986_c0_g1	0.9147	blue	0.555	0.754	0.698	-0.587	0.293	-0.412	0.715	-0.601	-0.57	0.752	-0.256	-0.428	-0.675	-0.55	0.495	-0.578	0.365	-0.627
TRINITY_DN2806_c0_g1	TRINITY_DN2806_c0_g1	39.366	TRINITY_DN2806_c0_g1	0.9098	blue	0.531	0.657	0.561	-0.412	0.157	-0.316	0.561	-0.427	-0.48	0.643	-0.072	-0.248	-0.512	-0.378	0.293	-0.396	0.323	-0.529
TRINITY_DN14164_c1_g1	TRINITY_DN14164_c1_g1	35.8934	TRINITY_DN14164_c1_g1	0.9065	blue	0.263	0.565	0.338	-0.336	-0.103	0.0068	0.341	-0.353	-0.57	0.586	-0.06	0.0211	-0.485	-0.189	0.0777	-0.316	0.247	-0.263
TRINITY_DN5539_c0_g1	TRINITY_DN5539_c0_g1	40.4105	TRINITY_DN5539_c0_g1	0.905	blue	0.577	0.724	0.621	-0.422	0.23	-0.384	0.596	-0.434	-0.388	0.608	-0.0218	-0.269	-0.5	-0.343	0.306	-0.412	0.236	-0.581
TRINITY_DN22412_c0_g2	TRINITY_DN22412_c0_g2	37.2764	TRINITY_DN22412_c0_g2	0.9048	blue	0.319	0.472	0.327	-0.38	-0.0543	-0.0879	0.354	-0.395	-0.457	0.538	-0.0748	-0.0225	-0.391	-0.161	0.149	-0.368	0.0167	-0.383
TRINITY_DN8865_c0_g1	TRINITY_DN8865_c0_g1	38.2629	TRINITY_DN8865_c0_g1	0.8949	blue	0.663	0.685	0.665	-0.576	0.256	-0.492	0.707	-0.587	-0.456	0.774	-0.196	-0.418	-0.518	-0.495	0.482	-0.578	0.278	-0.746
TRINITY_DN11718_c1_g1	TRINITY_DN11718_c1_g1	37.414	TRINITY_DN11718_c1_g1	0.8933	blue	0.355	0.504	0.283	-0.227	-0.167	-0.0765	0.279	-0.242	-0.329	0.428	0.13	0.0942	-0.289	-0.0254	0.0006	-0.216	0.033	-0.352
TRINITY_DN8958_c0_g1	TRINITY_DN8958_c0_g1	39.8665	TRINITY_DN8958_c0_g1	0.8892	blue	0.558	0.575	0.53	-0.468	0.189	-0.382	0.548	-0.478	-0.336	0.593	-0.0661	-0.249	-0.378	-0.276	0.327	-0.466	0.0474	-0.645
TRINITY_DN13462_c0_g1	TRINITY_DN13462_c0_g1	38.4009	TRINITY_DN13462_c0_g1	0.8847	blue	0.629	0.666	0.624	-0.536	0.279	-0.453	0.664	-0.545	-0.424	0.707	-0.14	-0.368	-0.499	-0.42	0.412	-0.537	0.185	-0.71
TRINITY_DN7698_c0_g1	TRINITY_DN7698_c0_g1	41.8504	TRINITY_DN7698_c0_g1	0.8809	blue	0.62	0.599	0.504	-0.37	0.0731	-0.382	0.512	-0.38	-0.286	0.585	0.0554	-0.177	-0.315	-0.222	0.225	-0.372	0.0689	-0.643
TRINITY_DN970_c0_g1	TRINITY_DN970_c0_g1	37.6026	TRINITY_DN970_c0_g1	0.8771	blue	0.628	0.598	0.542	-0.468	0.173	-0.424	0.585	-0.478	-0.346	0.666	-0.0724	-0.289	-0.384	-0.333	0.334	-0.47	0.115	-0.697
TRINITY_DN18073_c0_g1	TRINITY_DN18073_c0_g1	39.1014	TRINITY_DN18073_c0_g1	0.875	blue	0.579	0.595	0.436	-0.232	-0.0375	-0.32	0.417	-0.246	-0.225	0.467	0.181	-0.0758	-0.264	-0.13	0.116	-0.229	0.119	-0.54
TRINITY_DN13132_c0_g1	TRINITY_DN13132_c0_g1	36.1708	TRINITY_DN13132_c0_g1	0.8703	blue	0.603	0.578	0.493	-0.419	0.0828	-0.393	0.528	-0.429	-0.3	0.606	0.0021	-0.221	-0.335	-0.24	0.265	-0.426	0.12	-0.658
TRINITY_DN29445_c0_g2	TRINITY_DN29445_c0_g2	36.8814	TRINITY_DN29445_c0_g2	0.87	blue	0.62	0.636	0.519	-0.309	0.0493	-0.377	0.508	-0.323	-0.325	0.59	0.0777	-0.203	-0.364	-0.268	0.199	-0.306	0.247	-0.57
TRINITY_DN3680_c0_g1	TRINITY_DN3680_c0_g1	71.2144	TRINITY_DN3680_c0_g1	0.9896	brown	-0.39	-0.674	-0.54	0.494	-0.1	0.186	-0.532	0.511	0.605	-0.69	0.176	0.196	0.593	0.36	-0.295	0.474	-0.285	0.443
TRINITY_DN8833_c0_g1	TRINITY_DN8833_c0_g1	65.4312	TRINITY_DN8833_c0_g1	0.9705	brown	-0.354	-0.603	-0.424	0.316	0.0575	0.109	-0.388	0.335	0.484	-0.549	0.0053	0.0425	0.467	0.208	-0.114	0.297	-0.228	0.325
TRINITY_DN2035_c0_g1	TRINITY_DN2035_c0_g1	63.2035	TRINITY_DN2035_c0_g1	0.9679	brown	-0.417	-0.754	-0.594	0.506	-0.172	0.225	-0.573	0.522	0.603	-0.718	0.187	0.245	0.621	0.4	-0.336	0.487	-0.304	0.461
TRINITY_DN2827_c1_g1	TRINITY_DN2827_c1_g1	69.2798	TRINITY_DN2827_c1_g1	0.9662	brown	-0.498	-0.665	-0.542	0.388	-0.0588	0.273	-0.506	0.406	0.448	-0.62	0.0212	0.17	0.456	0.285	-0.231	0.374	-0.258	0.497
TRINITY_DN8912_c0_g3	TRINITY_DN8912_c0_g3	63.4127	TRINITY_DN8912_c0_g3	0.9654	brown	-0.391	-0.69	-0.549	0.453	-0.109	0.2	-0.519	0.47	0.591	-0.681	0.163	0.219	0.583	0.375	-0.297	0.431	-0.376	0.396
TRINITY_DN16333_c0_g1	TRINITY_DN16333_c0_g1	61.5614	TRINITY_DN16333_c0_g1	0.9619	brown	-0.203	-0.596	-0.404	0.506	-0.0053	-0.0107	-0.412	0.523	0.697	-0.693	0.245	0.0738	0.584	0.272	-0.216	0.483	-0.223	0.298
TRINITY_DN127_c0_g1	TRINITY_DN127_c0_g1	59.7893	TRINITY_DN127_c0_g1	0.9579	brown	-0.276	-0.605	-0.458	0.532	-0.0823	0.0937	-0.474	0.549	0.655	-0.678	0.256	0.159	0.577	0.326	-0.31	0.507	-0.237	0.394
TRINITY_DN24711_c0_g1	TRINITY_DN24711_c0_g1	63.2186	TRINITY_DN24711_c0_g1	0.9557	brown	-0.376	-0.618	-0.483	0.465	-0.0253	0.145	-0.468	0.481	0.573	-0.7	0.137	0.126	0.491	0.276	-0.214	0.451	-0.214	0.428
TRINITY_DN7095_c0_g1	TRINITY_DN7095_c0_g1	65.7099	TRINITY_DN7095_c0_g1	0.9545	brown	-0.461	-0.731	-0.501	0.279	0.0227	0.197	-0.441	0.297	0.442	-0.574	-0.0765	0.0786	0.462	0.224	-0.124	0.263	-0.321	0.386
TRINITY_DN13078_c0_g1	TRINITY_DN13078_c0_g1	58.3035	TRINITY_DN13078_c0_g1	0.9533	brown	-0.253	-0.604	-0.433	0.487	-0.0362	0.0495	-0.443	0.506	0.665	-0.667	0.235	0.116	0.579	0.32	-0.266	0.461	-0.239	0.342
TRINITY_DN5834_c0_g1	TRINITY_DN5834_c0_g1	62.4903	TRINITY_DN5834_c0_g1	0.9531	brown	-0.405	-0.582	-0.431	0.301	0.0352	0.164	-0.389	0.318	0.405	-0.534	-0.0377	0.0563	0.399	0.178	-0.105	0.286	-0.174	0.37
TRINITY_DN5610_c0_g1	TRINITY_DN5610_c0_g1	55.3203	TRINITY_DN5610_c0_g1	0.9518	brown	-0.346	-0.761	-0.62	0.577	-0.224	0.192	-0.615	0.594	0.722	-0.746	0.314	0.306	0.751	0.5	-0.418	0.554	-0.391	0.423
TRINITY_DN5794_c0_g1	TRINITY_DN5794_c0_g1	62.4012	TRINITY_DN5794_c0_g1	0.9513	brown	-0.392	-0.621	-0.412	0.296	0.0637	0.127	-0.387	0.315	0.477	-0.569	-0.0204	0.0416	0.428	0.205	-0.118	0.275	-0.278	0.357
TRINITY_DN1242_c0_g1	TRINITY_DN1242_c0_g1	57.8677	TRINITY_DN1242_c0_g1	0.9468	brown	-0.253	-0.571	-0.376	0.39	0.0715	0.0118	-0.368	0.409	0.596	-0.595	0.116	0.0128	0.504	0.216	-0.148	0.367	-0.216	0.291
TRINITY_DN2663_c0_g1	TRINITY_DN2663_c0_g1	55.6522	TRINITY_DN2663_c0_g1	0.9436	brown	-0.182	-0.621	-0.402	0.454	-0.0019	-0.0253	-0.397	0.475	0.713	-0.684	0.241	0.0888	0.593	0.309	-0.219	0.421	-0.374	0.24
TRINITY_DN28356_c0_g1	TRINITY_DN28356_c0_g1	55.4605	TRINITY_DN28356_c0_g1	0.942	brown	-0.315	-0.621	-0.448	0.453	-0.0536	0.116	-0.431	0.469	0.54	-0.653	0.145	0.121	0.47	0.241	-0.219	0.433	-0.186	0.39
TRINITY_DN8881_c1_g1	TRINITY_DN8881_c1_g1	61.2335	TRINITY_DN8881_c1_g1	0.9403	brown	-0.372	-0.64	-0.378	0.208	0.131	0.111	-0.329	0.228	0.401	-0.483	-0.115	-0.0072	0.392	0.123	-0.0433	0.192	-0.273	0.296
TRINITY_DN1242_c0_g2	TRINITY_DN1242_c0_g2	55.1302	TRINITY_DN1242_c0_g2	0.9402	brown	-0.282	-0.564	-0.384	0.442	0.0011	0.0527	-0.406	0.457	0.592	-0.649	0.164	0.0768	0.53	0.256	-0.183	0.423	-0.211	0.326
TRINITY_DN16582_c0_g1	TRINITY_DN16582_c0_g1	58.4709	TRINITY_DN16582_c0_g1	0.9399	brown	-0.504	-0.726	-0.628	0.571	-0.211	0.327	-0.648	0.586	0.614	-0.773	0.242	0.346	0.63	0.48	-0.434	0.556	-0.381	0.578
TRINITY_DN6547_c0_g1	TRINITY_DN6547_c0_g1	59.327	TRINITY_DN6547_c0_g1	0.9378	brown	-0.354	-0.555	-0.364	0.338	0.113	0.0866	-0.352	0.356	0.457	-0.573	-0.0058	-0.0131	0.361	0.127	-0.0867	0.323	-0.129	0.389
TRINITY_DN10593_c0_g1	TRINITY_DN10593_c0_g1	57.6978	TRINITY_DN10593_c0_g1	0.9347	brown	-0.314	-0.671	-0.413	0.239	0.0953	0.0548	-0.343	0.259	0.51	-0.528	-0.0499	-0.0007	0.467	0.174	-0.0565	0.215	-0.345	0.238
TRINITY_DN8270_c0_g1	TRINITY_DN8270_c0_g1	56.5782	TRINITY_DN8270_c0_g1	0.9343	brown	-0.242	-0.673	-0.411	0.29	0.0812	-0.0018	-0.338	0.311	0.589	-0.59	0.0395	0.0123	0.504	0.204	-0.0762	0.264	-0.371	0.19
TRINITY_DN3680_c0_g2	TRINITY_DN3680_c0_g2	58.9616	TRINITY_DN3680_c0_g2	0.9324	brown	-0.496	-0.652	-0.507	0.403	-0.0432	0.262	-0.496	0.418	0.447	-0.638	0.0429	0.154	0.431	0.274	-0.246	0.395	-0.172	0.518
TRINITY_DN90126_c0_g1	TRINITY_DN90126_c0_g1	55.8381	TRINITY_DN90126_c0_g1	0.9299	brown	-0.434	-0.803	-0.556	0.298	-0.0472	0.204	-0.479	0.316	0.49	-0.59	-0.0343	0.145	0.545	0.282	-0.16	0.28	-0.428	0.353
TRINITY_DN10147_c1_g1	TRINITY_DN10147_c1_g1	56.4805	TRINITY_DN10147_c1_g1	0.9296	brown	-0.459	-0.673	-0.471	0.229	0.0451	0.192	-0.403	0.246	0.373	-0.511	-0.128	0.0446	0.408	0.174	-0.0617	0.216	-0.218	0.373
TRINITY_DN13358_c0_g1	TRINITY_DN13358_c0_g1	56.8147	TRINITY_DN13358_c0_g1	0.9277	brown	-0.462	-0.679	-0.435	0.245	0.0647	0.183	-0.406	0.262	0.396	-0.532	-0.111	0.0429	0.428	0.185	-0.0822	0.231	-0.28	0.385
TRINITY_DN4680_c0_g1	TRINITY_DN4680_c0_g1	57.5194	TRINITY_DN4680_c0_g1	0.9205	brown	-0.617	-0.717	-0.667	0.567	-0.247	0.442	-0.686	0.579	0.49	-0.755	0.18	0.379	0.553	0.461	-0.447	0.564	-0.256	0.692
TRINITY_DN7101_c0_g1	TRINITY_DN7101_c0_g1	58.9664	TRINITY_DN7101_c0_g1	0.9198	brown	-0.488	-0.655	-0.461	0.27	0.0613	0.218	-0.407	0.286	0.361	-0.556	-0.112	0.0483	0.338	0.152	-0.0934	0.261	-0.191	0.447
TRINITY_DN13056_c0_g1	TRINITY_DN13056_c0_g1	57.914	TRINITY_DN13056_c0_g1	0.9182	brown	-0.508	-0.627	-0.479	0.4	-0.0131	0.255	-0.483	0.413	0.427	-0.637	0.0138	0.126	0.406	0.231	-0.197	0.397	-0.122	0.54
TRINITY_DN17804_c0_g1	TRINITY_DN17804_c0_g1	58.0145	TRINITY_DN17804_c0_g1	0.9136	brown	-0.561	-0.621	-0.507	0.318	-0.0244	0.329	-0.481	0.333	0.326	-0.548	-0.0765	0.157	0.38	0.228	-0.18	0.313	-0.217	0.522
