# Supplementary material for: Mechanisms of SNP and melatonin effects on antioxidant and chlorophyll metabolism in postharvest okra
Source: NPJ Sci Food. 2025 Aug 25;9:188. doi: 10.1038/s41538-025-00553-1 (PMC12378788; doi:10.1038/s41538-025-00553-1)
Supplement: Supplementary file 6 — Supplementary Data 5 [file 41538_2025_553_MOESM6_ESM.xlsx]

## Sheet: module-gene
Module	Gene ID	Gene Name	nr_Symbol	Control1_count	Control1_FPKM	Control2_count	Control2_FPKM	Control3_count	Control3_FPKM	FH1_count	FH1_FPKM	FH2_count	FH2_FPKM	FH3_count	FH3_FPKM	MT1_count	MT1_FPKM	MT2_count	MT2_FPKM	MT3_count	MT3_FPKM	SNP1_count	SNP1_FPKM	SNP2_count	SNP2_FPKM	SNP3_count	SNP3_FPKM	SNPMT1_count	SNPMT1_FPKM	SNPMT2_count	SNPMT2_FPKM	SNPMT3_count	SNPMT3_FPKM	Control1_Control2_Control3_count	Control1_Control2_Control3_FPKM	FH1_FH2_FH3_count	FH1_FH2_FH3_FPKM	MT1_MT2_MT3_count	MT1_MT2_MT3_FPKM	SNP1_SNP2_SNP3_count	SNP1_SNP2_SNP3_FPKM	SNPMT1_SNPMT2_SNPMT3_count	SNPMT1_SNPMT2_SNPMT3_FPKM	Control1_Control2_Control3_vs_MT1_MT2_MT3_DESeq2_Pvalue	Control1_Control2_Control3_vs_MT1_MT2_MT3_DESeq2_log2FC	Control1_Control2_Control3_vs_MT1_MT2_MT3_DESeq2_(Pvalue_0.01_FC_1.5)_regulated	Control1_Control2_Control3_vs_SNP1_SNP2_SNP3_DESeq2_Pvalue	Control1_Control2_Control3_vs_SNP1_SNP2_SNP3_DESeq2_log2FC	Control1_Control2_Control3_vs_SNP1_SNP2_SNP3_DESeq2_(Pvalue_0.01_FC_1.5)_regulated
yellow	TRINITY_DN1085_c0_g1	NAC86	LOC120117319	3796	109.51	7762	175.65	6013	193.63	1210	18.3	563	17.98	988	21.07	6107	126.03	3447	95.77	9916	160.08	5760	161.58	7079	232.12	8125	245.28	2687	79.41	6443	110.56	3973	125.94	5857	159.6	920.33	19.12	6490	127.29	6988	212.99	4367.67	105.3	0.239848436319838	-0.329543	normal	0.0555027075588203	0.540082226466825	normal
yellow	TRINITY_DN11501_c1_g1	DREB1A	LOC120118437	2265	147.64	5230	267.82	3218	237.35	252	8.47	151	11.45	191	8.99	5107	238.17	2830	176.52	6428	238.6	1996	132.35	2669	203.82	3178	223.98	762	56.02	4946	193.28	2198	153.02	3571	217.6	198	9.64	4788.33	217.76	2614.33	186.72	2635.33	134.11	0.99457370633627	0.00175622581661434	normal	0.657587414208928	-0.134095	normal
yellow	TRINITY_DN12218_c1_g1	MYC2	--	2589	145.34	6095	269.7	4844	307.56	1254	36.3	358	23.34	917	37.15	3299	132.45	1669	89.65	4810	154.18	6320	362.15	6787	447.02	9589	583.64	2282	144.63	6028	203.43	3809	228.83	4509.33	240.87	843	32.26	3259.33	125.43	7565.33	464.27	4039.67	192.3	0.0022555388738922	-0.943458	down	0.000963857946914236	1.02966043018406	up
yellow	TRINITY_DN1762_c0_g1	SCL21	LOC108480550	3566	134.71	7288	233.37	4939	218.12	1621	40.05	437	19.87	1150	38.73	3617	100.68	2391	92.61	6250	145.16	2342	98.05	3516	179.56	5659	263.89	2622	145.95	5799	141.47	2836	123.21	5264.33	195.4	1069.33	32.88	4086	112.82	3839	180.5	3752.33	136.88	0.00162392274097036	-0.819636	down	0.662504774918715	-0.149938	normal
yellow	TRINITY_DN19693_c0_g1	ERF9	LOC18608748	274	132.42	711	248.07	499	276.56	191	47.44	46	30.4	121	41.98	593	197.09	374	161.91	638	164.53	581	267.9	530	292.73	700	364.62	322	187.75	653	171.94	447	220.63	494.67	219.02	119.33	39.94	535	174.51	603.67	308.42	474	193.44	0.409649045439469	-0.287253	normal	0.120089869963112	0.581292203475253	normal
yellow	TRINITY_DN2017_c0_g1	NPY2	LOC120125590	428	21.15	664	25.83	380	21.22	86	2.2	38	2.17	88	3.16	760	26.84	778	36.87	1025	28.91	407	20.4	548	31.63	648	34.56	473	26.25	1053	31.29	545	28.82	490.67	22.73	70.67	2.51	854.33	30.87	534.33	28.86	690.33	28.79	0.10342120749224	0.435923802636522	normal	0.213308302283503	0.430335038368002	normal
yellow	TRINITY_DN21582_c0_g1	MYB57	LOC120158350	216	10.51	380	14.48	197	10.94	13	0.32	0	0	17	0.59	348	12.06	295	13.66	633	17.63	317	15.84	360	20.54	682	35.97	148	8.19	278	8.01	231	11.9	264.33	11.98	10	0.3	425.33	14.45	453	24.12	219	9.37	0.417683863845602	0.27449418500148	normal	0.0108528714101142	1.09560880109233	normal
yellow	TRINITY_DN2680_c0_g1	PLATPase	LOC120172445	2231	185.73	4893	318.51	4063	382.93	2076	88.98	1038	100.88	1521	91.21	3615	214.81	2533	200.98	5992	282.92	5004	422.12	4371	425.59	5902	530.94	2216	208.72	4959	246.23	2656	235.46	3729	295.72	1545	93.69	4046.67	232.9	5092.33	459.55	3277	230.14	0.23049548606913	-0.344685	normal	0.0140636026088052	0.719497412743002	normal
yellow	TRINITY_DN3772_c0_g1	ERF4	LOC105778838	1354	116.62	1958	131.88	1686	164.38	877	38.97	255	25.72	713	44.32	1745	107.3	1154	94.73	2805	137.07	1333	116.4	1455	146.62	2082	193.84	907	88.49	1672	85.88	1056	96.91	1666	137.63	615	36.34	1901.33	113.03	1623.33	152.29	1211.67	90.43	0.253930065913718	-0.288395	normal	0.443419551790335	0.225243505052862	normal
yellow	TRINITY_DN4909_c0_g1	ZAT12	LOC120162130	1065	43.47	1246	41.01	549	26	51	1.34	46	2.16	17	0.6	1500	44.59	746	29.27	1788	42.22	745	31.8	943	45.08	1082	47.67	366	16.77	1538	37.79	646	28.19	953.33	36.83	38	1.37	1344.67	38.69	923.33	41.52	850	27.58	0.816603125319626	0.0686426961704857	normal	0.421118528897522	0.265363426436646	normal
yellow	TRINITY_DN519_c0_g2	TIFY6B	LOC110422429	257	13.21	324	13.7	191	11.23	48	1.3	29	1.68	53	2.02	188	7.2	233	11.74	411	12.52	151	8.1	169	10.78	263	15	170	10.54	279	9	173	10.19	257.33	12.71	43.33	1.67	277.33	10.49	194.33	11.29	207.33	9.91	0.426104744975815	-0.303909	normal	0.801243465407368	-0.113225	normal
yellow	TRINITY_DN6087_c1_g1	WRKY33	LOC120206307	711	32.55	1567	57.07	1105	58.14	414	9.98	123	6.51	312	10.51	1157	38.43	532	23.48	1684	44.71	829	39.02	903	49.15	962	48.1	753	39.44	881	24.55	862	42.72	1127.67	49.25	283	9	1124.33	35.54	898	45.42	832	35.57	0.145860197163671	-0.476101	normal	0.909977806587711	-0.0352157	normal
yellow	TRINITY_DN6479_c0_g1	ERF112	LOC120134515	705	49.23	1964	107.75	2150	169.84	879	31.39	346	27.87	733	36.68	1802	90.11	931	62.27	2723	108.2	1702	121.25	2190	178.96	3926	295.97	853	67.02	2773	115.75	1616	120.18	1606.33	108.94	652.67	31.98	1818.67	86.86	2606	198.73	1747.33	100.98	0.400968714110441	-0.333044	normal	0.0276754015680434	0.952735917812008	normal
yellow	TRINITY_DN68877_c0_g4	MYB73	--	233	26.9	925	82.98	303	39.63	9	0.54	9	1.23	7	0.58	650	53.41	383	42.02	695	45.3	2114	246.28	1041	140.46	1695	211.46	117	15.37	275	18.8	191	23.41	487	49.84	8.33	0.78	576	46.91	1616.67	199.4	194.33	19.19	0.861140722514873	-0.0716905	normal	2.75309258515957e-07	2.09877238014397	up
yellow	TRINITY_DN8242_c1_g1	ERF4	--	1823	202.73	3630	313.87	3445	432.83	1642	93.97	593	79.15	1232	98.25	3489	276.24	2237	236.11	6642	417.08	3979	445.72	3967	515.87	5126	614.18	1258	159.96	3318	219.37	2062	245.05	2966	316.48	1155.67	90.46	4122.67	309.81	4357.33	525.26	2212.67	208.13	0.92131216884365	-0.0314375	normal	0.00771141172667958	0.811919894628624	up
yellow	TRINITY_DN136089_c0_g1	BAK1	LOC120202338	272	151.09	212	83.83	250	159.57	0	0	0	0	0	0	451	171.19	239	117.47	300	87.94	243	127.61	252	159.07	206	123.08	305	206.78	375	111.71	119	66.89	244.67	131.5	0	0	330	125.53	233.67	136.59	266.33	128.46	0.965769255998578	-0.017885	normal	0.733904059777335	0.149711320926566	normal
yellow	TRINITY_DN1642_c0_g1	SIS8	LOC111303337	2123	50.33	2007	44.66	1267	39.64	813	10.78	292	8.68	675	12.36	2048	39.6	985	23.22	2266	34.07	1488	48.32	1493	50.16	2256	67.88	779	22.16	2566	36.15	966	27.87	1799	44.88	593.33	10.61	1766.33	32.3	1745.67	55.45	1437	28.73	0.072708073829666	-0.484487	normal	0.44837096014454	0.227547086251091	normal
yellow	TRINITY_DN18436_c0_g1	LOB22	LOC120192504	1752	57.92	6525	170.16	8034	301.52	951	16.56	236	9.33	749	18.46	4101	96.84	3100	99.7	8304	156.84	5867	198.65	10001	390.77	13446	481.6	2755	100.56	8249	164.37	4006	142.06	5437	176.53	645.33	14.78	5168.33	117.79	9771.33	357.01	5003.33	135.66	0.175640571084937	-0.59292	normal	0.0179805109078691	1.09481551014589	normal
yellow	TRINITY_DN228_c0_g1	CCR4	LOC120118539	1065	29.26	1993	41.92	2916	92.33	430	5.93	106	3.19	342	6.55	2462	49.6	1587	43.1	4961	76.95	1349	38.9	2366	75.66	3573	108.88	1403	41.1	3245	53	1742	50.74	1991.33	54.5	292.67	5.22	3003.33	56.55	2429.33	74.48	2130	48.28	0.939044615613674	0.030259554812105	normal	0.247762591843646	0.510162327973494	normal
yellow	TRINITY_DN2368_c0_g1	FER	--	505	39.25	1449	88.22	1348	118.56	241	9.66	85	7.71	173	9.71	1366	75.86	1054	78.19	2838	125.32	1471	116.07	1786	162.48	2405	202.07	813	71.48	1409	65.44	842	69.79	1100.67	82.01	166.33	9.03	1752.67	93.12	1887.33	160.21	1021.33	68.9	0.633844618231822	0.183217751662751	normal	0.00726062711593191	1.05021166712923	up
yellow	TRINITY_DN2740_c0_g2	IRK	LOC120176192	1680	52.17	3352	85.32	3035	104.07	1833	30.83	644	20.2	1293	31.42	3740	79.47	2544	71.36	5077	89.74	2944	98.02	4026	151.02	4333	152.79	1574	67.14	3765	66.41	2368	72.71	2689	80.52	1256.67	27.48	3787	80.19	3767.67	133.94	2569	68.75	0.882708767083356	0.0406114469937907	normal	0.0160512257085287	0.757447805209207	normal
yellow	TRINITY_DN34_c2_g1	CDPK32	--	1323	70.25	1336	56.5	1228	74.16	389	10.54	123	6.73	334	12.88	1399	54	754	39.12	2368	72.69	1151	62.69	1448	90.39	2283	133.05	642	39.17	874	27.84	630	35.9	1295.67	66.97	282	10.05	1507	55.27	1627.33	95.38	715.33	34.3	0.302293681310587	-0.304315	normal	0.0806116968246638	0.579635655876217	normal
yellow	TRINITY_DN41129_c0_g1	CCR3	--	440	33.94	710	42.91	874	76.3	264	10.51	110	9.9	197	10.97	733	40.41	441	32.47	1233	54.04	286	22.4	620	55.99	892	74.39	218	19.02	881	40.62	433	35.63	674.67	51.05	190.33	10.46	802.33	42.31	599.33	50.93	510.67	31.76	0.452734725419217	-0.27899	normal	0.876031945844374	0.0741164339678329	normal
yellow	TRINITY_DN4714_c0_g1	BLAD	LOC120117631	4176	106.21	9139	184.96	8499	235.16	3241	52.9	1415	54.47	2403	55.14	7297	135.87	4128	105.08	10382	151.93	10049	245.9	11027	312.95	15278	397.95	4756	130.62	10784	167.64	5869	155.28	7271.33	175.44	2353	54.17	7269	130.96	12118	318.93	7136.33	151.18	0.110477877885943	-0.4811	normal	0.00167839109934348	1.00124478237848	up
yellow	TRINITY_DN660_c0_g1	FER	LOC120212103	3856	77.68	9368	149.7	11104	252.65	4639	48.24	3032	69.77	3128	45.52	10884	157.58	8405	163.22	16361	189.09	9208	190.05	11234	265.88	17569	382.81	6094	137.63	11590	141.53	8257	178.6	8109.33	160.01	3599.67	54.51	11883.3	169.96	12670.3	279.58	8647	152.59	0.835370712314556	0.0722431940990521	normal	0.0226356971878344	0.885241115622579	normal
yellow	TRINITY_DN660_c0_g2	FER	LOC120212103	888	26.58	1814	42.92	1835	61.95	172	2.65	89	3.04	103	2.22	1733	37.2	942	27.13	2617	44.84	1836	56.04	1667	58.4	3703	119.49	1043	34.99	1298	23.45	903	29	1512.33	43.82	121.33	2.64	1764	36.39	2402	77.98	1081.33	29.15	0.404601299995925	-0.279982	normal	0.0180989088488865	0.918951760478781	normal
yellow	TRINITY_DN7976_c0_g1	WAK2	--	653	17.26	1081	23.01	1333	38.14	638	8.95	208	6.55	413	8.2	953	18.7	784	19.79	2048	30.01	696	18.89	1069	32.51	1447	44.17	624	19.06	1266	21.84	656	19.29	1022.33	26.14	419.67	7.9	1261.67	22.83	1070.67	31.86	848.67	20.06	0.542070743946283	-0.221899	normal	0.450201896966517	0.304298779298134	normal
yellow	TRINITY_DN8114_c0_g1	MAPKKK18	--	1549	56.38	933	24.85	863	34.01	237	4.44	75	2.18	172	4.81	1114	33.93	574	21.38	1123	26.25	1038	38.82	1242	52.38	1080	43.74	627	23.52	1323	31.46	699	30.62	1115	38.41	161.33	3.81	937	27.19	1120	44.98	883	28.53	0.0287336927839331	-0.734767	normal	0.494793188033839	0.237219193763736	normal
yellow	TRINITY_DN91_c0_g1	LECRK3	--	5060	202.75	5242	153.3	5236	177.65	1345	40.63	649	36.25	930	40.58	7506	186.19	5481	182.6	9154	185.01	6801	178.21	5319	164.05	6049	209.78	4960	202.15	5913	110.12	4987	165.86	5179.33	177.9	974.67	39.15	7380.33	184.6	6056.33	184.01	5286.67	159.38	0.803447418431707	0.0535840220909161	normal	0.0566358092726902	0.453341557147382	normal
yellow	TRINITY_DN71851_c0_g1	POD25	LOC110411071	392	24.29	1595	77.7	967	67.78	216	6.91	100	7.19	155	6.93	1287	57.08	777	46.08	1540	54.37	930	58.66	1460	106.02	833	55.81	694	48.53	1469	54.61	1269	84.03	984.67	56.59	157	7.01	1201.33	52.51	1074.33	73.5	1144	62.39	0.787655711112302	-0.1023	normal	0.278241109654485	0.462381122684486	normal
turquoise	TRINITY_DN10109_c0_g1	MBF1b	LOC105766342	364	50.1	564	56.68	443	67.4	5018	342.89	2651	414.85	3466	330.96	611	58.61	547	70.63	784	59.07	513	68.63	448	70.91	488	71.53	455	68.17	717	57.72	265	39.14	457	58.06	3711.67	362.9	647.33	62.77	483	70.36	479	55.01	0.726721178145068	0.0980120972476601	normal	0.281866944202904	0.344951450812113	normal
turquoise	TRINITY_DN104532_c0_g1	LOB21	LOC120162307	7	1.08	0	0	0	0	1323	105.64	748	139.34	920	102.76	4	0.44	0	0	0	0	6	0.93	3	0.54	16	2.68	0	0	0	0	0	0	2.33	0.36	997	115.91	1.33	0.15	8.33	1.38	0	0	--	--	--	--	--	--
turquoise	TRINITY_DN10678_c0_g1	AnnD5	LOC120121987	187	9.57	357	12.42	202	10.21	3522	82.36	1480	76.35	2493	81.74	229	7.31	226	9.74	312	8.03	285	13.62	179	9.45	312	15.86	138	6.5	302	8.56	319	14.93	248.67	10.73	2498.33	80.15	255.67	8.36	258.67	12.98	253	10	0.372856468023623	-0.321672	normal	0.405746884417141	0.353106745226409	normal
turquoise	TRINITY_DN107501_c0_g1	WLIM1	LOC120202104	191	13.37	406	22.3	395	31.29	10782	400.13	4767	413.04	7790	405.42	357	21.07	280	23.3	531	23.5	611	43.48	405	33.21	523	41.53	93	9.9	569	23.85	377	28.17	330.67	22.32	7779.67	406.2	389.33	22.62	513	39.41	346.33	20.64	0.575990644153776	-0.217794	normal	0.0306801191693303	0.876230002994959	normal
turquoise	TRINITY_DN11384_c0_g2	WLIM1	LOC18047047	491	52.57	990	85.65	600	69.73	4949	253.05	1663	237.06	3651	263.92	792	49.8	694	66.22	1163	68.79	879	78.48	611	84.68	694	84.53	378	69.4	1158	72.66	565	76.11	693.67	69.32	3421	251.34	883	61.6	728	82.56	700.33	72.72	0.877117027470833	-0.0416402	normal	0.239212118310705	0.360730656102561	normal
turquoise	TRINITY_DN1182_c0_g1	HAT5	LOC18604593	1295	71.27	2728	118.9	1540	95.5	12532	353.81	4739	302.29	8873	350.65	2619	103.07	2055	107.83	2942	92.66	1737	97.73	1300	85.09	1207	71.97	1176	72.82	4129	136.71	2261	132.82	1854.33	95.22	8714.67	335.58	2538.67	101.19	1414.67	84.93	2522	114.12	0.699556059967488	0.0904215026254298	normal	0.743041512980945	-0.0897811	normal
turquoise	TRINITY_DN16142_c0_g1	ATHB-16	LOC120137651	196	9.6	409	15.86	184	10.04	3619	91.54	2114	118.23	2541	89.69	494	17.15	704	32.78	544	15.26	245	12.32	220	12.26	316	16.51	168	9.54	737	21.47	473	24.72	263	11.83	2758	99.82	580.67	21.73	260.33	13.7	459.33	18.58	0.0274691056145897	0.88239893460464	normal	0.454388681996928	0.315103954615039	normal
turquoise	TRINITY_DN2167_c0_g1	COL14	LOC120205796	143	8.64	278	13.21	183	14.3	4479	150.68	1374	98.16	3446	162.47	147	5.45	75	4.61	384	12.78	180	11.37	180	12.45	223	12.3	144	8.03	277	9.18	179	11.97	201.33	12.05	3099.67	137.1	202	7.61	194.33	12.04	200	9.73	0.314605530474298	-0.518907	normal	0.586502134112291	0.243309395949477	normal
turquoise	TRINITY_DN2206_c0_g1	zf_CCCH20	--	794	40.22	1547	61.23	740	40.7	29575	709.67	13762	734.53	21445	722	1922	68.27	1589	75.97	2229	63.13	2162	108.35	838	50.22	1164	61.82	937	52.07	3052	90.51	1407	74.3	1027	47.38	21594	722.07	1913.33	69.12	1388	73.46	1798.67	72.29	0.0221631317132062	0.549649303356392	normal	0.0388782381729862	0.727090223695615	normal
turquoise	TRINITY_DN26555_c0_g1	DAP1	LOC120200612	88	7.92	516	30	182	16.49	3408	146.26	1817	180.14	2374	141.48	248	13.44	149	9.84	336	13.68	294	26.57	111	11.95	196	16.22	119	12.64	458	20.8	220	19.85	262	18.14	2533	155.96	244.33	12.32	200.33	18.25	265.67	17.76	0.411859935782048	-0.433683	normal	0.971669346633898	-0.0213425	normal
turquoise	TRINITY_DN27405_c0_g1	F3Y22_tig00111200	LOC120155648	19	0.91	22	1.01	3	0.2	1096	28.47	552	33.02	742	26.61	34	1.24	0	0	4	0.11	10	0.59	37	2.04	0	0	0	0	22	0.64	0	0	14.67	0.71	796.67	29.37	12.67	0.45	15.67	0.88	7.33	0.21	0.740047779956475	-0.583691	normal	0.783029279904591	0.491829826489581	normal
turquoise	TRINITY_DN32836_c0_g1	APL	LOC120198096	96	5.53	313	14.19	80	5.19	3669	109.5	2134	143.02	2771	115.7	258	10.58	78	4.27	302	9.89	116	6.82	36	2.43	100	6.23	65	4.25	293	10.1	65	3.98	163	8.3	2858	122.74	212.67	8.25	84	5.16	141	6.11	0.984149562981261	0.0112581736358772	normal	0.395020583577846	-0.584025	normal
turquoise	TRINITY_DN4091_c0_g2	SPL12	--	215	18.67	264	17.93	145	14.26	1597	71.55	971	98.79	1213	76.04	401	24.86	292	24.17	483	23.8	235	20.69	296	30.08	238	22.34	137	13.48	416	21.54	234	21.65	208	16.95	1260.33	82.13	392	24.28	256.33	24.37	262.33	18.89	0.117290302106509	0.5136328497475	normal	0.152654705187441	0.598204516469334	normal
turquoise	TRINITY_DN4562_c0_g1	WOX13	LOC120205756	561	40.11	868	52.82	613	54.3	5237	208.05	2142	195.1	3753	207.22	477	25.14	566	41.69	1040	45.54	435	34.08	256	23.4	325	26.21	240	21.3	954	42.65	676	55.77	680.67	49.08	3710.67	203.46	694.33	37.46	338.67	27.9	623.33	39.91	0.193570050628401	-0.396432	normal	0.0249661947790768	-0.744395	normal
turquoise	TRINITY_DN5242_c0_g1	LOC111314783	LOC111314783	112	13.53	214	20.3	96	13.03	3142	196.99	1198	172.43	2312	202.45	260	22.47	210	24.26	330	22.49	257	31.72	256	36.56	211	27.85	97	13.79	409	29.3	388	49.67	140.67	15.62	2217.33	190.62	266.67	23.07	241.33	32.04	298	30.92	0.151618353124458	0.563879110405839	normal	0.0139034853799451	1.10381826994241	normal
turquoise	TRINITY_DN5263_c0_g1	COL13	LOC120203154	516	25.09	647	24.68	367	20.14	2437	59.8	1327	74.44	1845	63.3	730	25.23	514	23.77	865	23.44	584	29.18	345	19.78	498	26.19	306	16.3	776	22.53	381	19.98	510	23.3	1869.67	65.85	703	24.15	475.67	25.05	487.67	19.6	0.818184435313306	0.0590687709820841	normal	0.604813295126981	0.173632949289588	normal
turquoise	TRINITY_DN581_c0_g1	2HADH	LOC120136328	779	15.17	920	14.1	779	17	3113	31.9	1639	38.32	2226	31.62	1051	14.73	709	13.28	1614	18.44	723	14.62	664	16.06	784	17.21	659	15.54	1180	14.25	618	13.51	826	15.42	2326	33.95	1124.67	15.48	723.67	15.96	819	14.43	0.907817652710231	-0.0295013	normal	0.827873449765321	0.0612656613508949	normal
turquoise	TRINITY_DN6812_c0_g1	CRF1	LOC105765286	61	3.33	41	1.76	34	2.1	2670	75.09	1170	73.78	1894	74.53	109	4.26	13	0.68	108	3.36	120	6.67	31	1.98	101	5.95	55	3.38	167	5.47	105	6.12	45.33	2.4	1911.33	74.47	76.67	2.77	84	4.87	109	4.99	0.818291012298023	0.19224280474852	normal	0.16800241689506	1.09688509622483	normal
turquoise	TRINITY_DN752_c0_g1	BZR1L1	LOC120138071	493	29.81	779	37.04	600	41.03	3585	111.84	2293	160.78	2596	113.32	717	31.03	699	40.46	936	32.25	832	51.21	539	38.19	668	43.67	419	28.58	1015	36.83	581	37.54	624	35.96	2824.67	128.65	784	34.58	679.67	44.36	671.67	34.32	0.815035568438052	-0.0636486	normal	0.214866288587907	0.381532448094892	normal
turquoise	TRINITY_DN7754_c0_g1	IAA27	LOC120194399	285	14.02	807	30.58	415	23.12	6482	169.39	2560	149.5	4532	165.46	741	26.03	486	22.65	1173	32.69	408	20.97	356	20.38	255	14.01	304	16.11	1537	45.07	896	46.89	502.33	22.57	4524.67	161.45	800	27.12	339.67	18.45	912.33	36.02	0.438963315449131	0.266435119793287	normal	0.553281310441495	-0.240208	normal
turquoise	TRINITY_DN794_c2_g1	BZIP9	--	478	27.54	612	27.89	557	36.49	2917	87.19	915	61.4	2088	87.32	779	32.31	535	29.68	929	30.62	431	25.42	445	30.21	551	34.51	415	27.11	1104	38.4	581	35.97	549	30.64	1973.33	78.64	747.67	30.87	475.67	30.05	700	33.83	0.995841207305146	-0.00140295	normal	0.892278545537875	0.045101804356152	normal
turquoise	TRINITY_DN12947_c0_g1	BSK1	--	549	20.23	909	26.31	539	22.56	4147	78.43	1964	83.02	3029	80.21	878	22.72	627	22	1173	24.5	601	21.83	524	22.75	539	20.74	262	10.58	1044	23.29	451	17.65	665.67	23.03	3046.67	80.55	892.67	23.07	554.67	21.77	585.67	17.17	0.950178908412361	0.0149983449046507	normal	0.918484767024714	0.0295603038965263	normal
turquoise	TRINITY_DN1555_c0_g1	CTR1	--	1591	70.78	2232	74.19	1372	56.53	11455	266.06	4937	187.09	8080	276.44	2455	64.84	1718	68.91	3365	83.95	1692	67.35	1350	53.81	1603	78.76	985	33.51	2145	51.28	1334	73.35	1731.67	67.17	8157.33	243.2	2512.67	72.57	1548.33	66.64	1488	52.71	0.556492683260341	0.113658894311015	normal	0.600238819081714	0.11962147262586	normal
turquoise	TRINITY_DN17465_c0_g2	LRR-RLK	LOC120160264	0	0	40	3.2	29	3.38	3013	159.79	1422	172.33	2144	159.08	148	10.85	154	15.05	85	4.94	31	3.22	23	2.76	55	6.11	15	1.75	157	9.59	56	6.12	23	2.19	2193	163.73	129	10.28	36.33	4.03	76	5.82	0.0326354505363181	2.23819428245824	normal	0.479869368126197	0.979891273519982	normal
turquoise	TRINITY_DN18653_c0_g1	CDL1	LOC120185588	20	0.97	0	0	0	0	427	10.64	269	14.99	259	9.03	0	0	16	0.74	41	1.13	13	0.64	16	0.91	0	0	0	0	16	0.47	0	0	6.67	0.32	318.33	11.55	19	0.62	9.67	0.52	5.33	0.16	--	--	--	--	--	--
turquoise	TRINITY_DN2035_c0_g2	BAM1	--	379	10.38	778	16.61	806	25.55	6985	96.68	3794	114.7	4476	84.94	956	18.58	899	23.33	1427	23.28	597	15.39	369	10.29	513	16.22	528	15.5	1559	24.7	763	24.14	654.33	17.51	5085	98.77	1094	21.73	493	13.97	950	21.45	0.378984904717591	0.302259667939139	normal	0.656248865517041	-0.175472	normal
turquoise	TRINITY_DN3276_c0_g3	CIPK33	LOC120116422	287	11.45	354	11.15	214	9.65	1850	38.07	717	32.3	1284	36.98	327	9.35	340	12.77	542	12.36	360	14.66	209	9.78	293	12.64	145	6.5	402	9.48	330	14.1	285	10.75	1283.67	35.78	403	11.49	287.33	12.36	292.33	10.03	0.763010413386976	0.0978988459857391	normal	0.474618823836862	0.279422123729687	normal
turquoise	TRINITY_DN4586_c0_g1	LRR-RLK	--	165	4.57	493	11.57	209	6.77	4347	75.17	1808	70.13	3225	77.88	323	7.2	249	7.4	387	6.88	242	7.45	375	13.66	425	14.27	91	3.52	469	7.39	141	5.18	289	7.64	3126.67	74.39	319.67	7.16	347.33	11.79	233.67	5.36	0.635681769017906	-0.186864	normal	0.170528162267932	0.630517388296698	normal
turquoise	TRINITY_DN8847_c0_g1	LOV	--	2	0.18	9	0.64	14	1.44	2044	95.73	694	73.92	1337	87.61	14	0.91	18	1.56	16	0.82	45	4.14	17	1.81	10	0.98	0	0	91	4.92	0	0	8.33	0.75	1358.33	85.75	16	1.1	24	2.31	30.33	1.64	--	--	--	--	--	--
turquoise	TRINITY_DN6347_c0_g2	GSTZ	LOC105777807	469	40.12	553	36.99	291	28.18	3777	166.67	1617	161.94	2671	164.9	566	34.57	622	50.71	1032	50.09	505	43.8	467	46.74	542	50.11	385	37.3	814	41.53	391	35.64	437.67	35.1	2688.33	164.5	740	45.12	504.67	46.88	530	38.16	0.241943904437583	0.359374524964305	normal	0.132171892417822	0.495376713354991	normal
blue	TRINITY_DN10213_c1_g1	GT-3B	--	1475	76.39	575	23.46	556	32.56	204	5.45	46	2.75	139	5.2	1310	48.6	880	43.69	1320	39.01	211	11.14	150	9.11	138	7.73	686	40.03	755	23.51	481	26.65	868.67	44.14	129.67	4.47	1170	43.77	166.33	9.33	640.67	30.06	0.922184878523038	-0.0402876	normal	4.40192143001135e-06	-2.18772	down
blue	TRINITY_DN13462_c0_g1	TIFY10A	LOC120179754	2046	307.25	2099	210.1	1802	291.3	448	36.57	94	14.77	341	41.75	1637	156.27	1119	132.07	2470	196.57	426	65.41	668	101.62	730	114.73	975	141.93	2166	180.21	999	153.79	1982.33	269.55	294.33	31.03	1742	161.64	608	93.92	1380	158.64	0.00456988028414102	-0.663619	down	6.19403869757404e-06	-1.44355	down
blue	TRINITY_DN14164_c1_g1	IAA26	LOC120204105	268	15.1	232	10.36	174	11.06	82	2.32	31	1.96	64	2.52	463	18.7	240	12.96	512	16.2	20	1.16	70	4.66	116	7.05	300	19.2	457	15.54	369	22.17	224.67	12.17	59	2.27	405	15.95	68.67	4.29	375.33	18.97	0.289420059599825	0.385044064355182	normal	0.0367659455408531	-1.43065	normal
blue	TRINITY_DN18073_c0_g1	PIL15	LOC120165346	2855	97	3003	80.95	1554	58.68	1481	24.92	583	22.67	1049	24.58	3270	79.24	2534	81.02	4849	92.26	1644	55.96	1562	59.65	1958	70.39	2684	100.42	4425	88.18	2326	85.01	2470.67	78.88	1037.67	24.06	3551	84.17	1721.33	62	3145	91.2	0.669606977379366	0.102543127886778	normal	0.392544489290524	-0.234448	normal
blue	TRINITY_DN199_c0_g1	SAPK10	LOC120211222	2187	101.49	1512	49.06	1032	45.81	424	9.13	121	5.74	259	7.97	1846	52.73	1198	44.82	2251	51.39	403	15.78	397	18.76	848	35.5	2027	138.89	2388	63.93	1336	118.74	1577	65.45	268	7.61	1765	49.65	549.33	23.35	1917	107.19	0.330912925011125	-0.293361	normal	0.0018538826648844	-1.2678	down
blue	TRINITY_DN22412_c0_g2	NAC10	LOC120175940	3273	151.19	2389	87.08	1272	66.39	1342	32.03	425	22.61	1041	34.76	4017	133.02	2621	116.17	4539	119.69	661	31.14	1613	87.31	955	47.65	1897	98.75	3633	101.18	1954	96.56	2311.33	101.55	936	29.8	3725.67	122.96	1076.33	55.37	2494.67	98.83	0.398993301602721	0.259286471561472	normal	0.0499653855342387	-0.810445	normal
blue	TRINITY_DN274_c0_g1	NAC55	LOC120148190	7979	539.56	5906	316.6	2893	221.18	2442	82.32	683	52.29	1717	82.27	7998	390.76	4710	312.36	7274	274.38	2867	211.38	1878	162.88	2062	164.72	4476	337.21	8101	327	4194	310.42	5592.67	359.11	1614	72.29	6660.67	325.83	2269	179.66	5590.33	324.88	0.612920851653699	-0.159875	normal	0.001768700199557	-1.04423	down
blue	TRINITY_DN2806_c0_g1	DOF2.5	--	520	27.42	261	10.9	197	11.36	33	0.92	0	0	23	0.9	245	9.46	212	9.89	284	8.53	9	0.5	72	4.38	168	9.34	286	15.56	469	14.8	216	11.86	326	16.56	18.67	0.61	247	9.29	83	4.74	323.67	14.07	0.0676760672585784	-0.834072	normal	0.0335145969953824	-1.71211	normal
blue	TRINITY_DN35354_c0_g1	RAP2-13	LOC120117353	569	25.37	445	15.57	147	7.42	80	1.83	16	0.84	67	2.15	274	8.71	219	9.38	260	6.59	49	2.22	73	3.92	31	1.49	462	23.06	518	13.84	398	18.9	387	16.12	54.33	1.61	251	8.23	51	2.54	459.33	18.6	0.0357338928017165	-0.98339	normal	1.1785976162719e-05	-2.62045	down
blue	TRINITY_DN5539_c0_g1	APRR5	LOC120133023	2142	73.13	1799	43.81	744	29.81	489	8.29	49	1.94	358	7.75	1388	32.03	759	24.87	1780	32.88	584	21.13	521	16.59	329	14.93	1166	44.07	1989	37.3	1305	48.32	1561.67	48.92	298.67	5.99	1309	29.93	478	17.55	1486.67	43.23	0.0424808208791313	-0.696355	normal	0.000252108714438121	-1.42702	down
blue	TRINITY_DN5911_c1_g1	WRKY57	LOC120213095	898	43.28	797	30.15	454	24.85	171	3.96	52	2.82	119	3.84	844	29.06	600	27.74	954	26.09	272	13.34	308	17.23	290	15.02	502	28.39	897	26.09	528	27.11	716.33	32.76	114	3.54	799.33	27.63	290	15.2	642.33	27.2	0.390151325859289	-0.255513	normal	0.00461997187526091	-1.02867	down
blue	TRINITY_DN5943_c0_g1	FAM135B	LOC120134609	3793	195.35	2839	115.71	1238	72.54	1543	40.97	503	29.95	1164	43.32	2676	98.92	1525	75.33	2985	88.01	766	40.32	665	40.3	753	42.16	1450	84.03	3352	104.15	1595	88.11	2623.33	127.87	1070	38.08	2395.33	87.42	728	40.93	2132.33	92.1	0.096350203097407	-0.562449	normal	1.17411752286335e-05	-1.57535	down
blue	TRINITY_DN6807_c0_g1	TIFY5A	LOC111274845	595	105.24	439	57.82	385	71.42	52	4.9	9	2	31	4.08	383	45.25	208	31.98	532	52.07	36	6.57	57	12.11	77	15.19	75	15.76	573	58.65	206	38.62	473	78.16	30.67	3.66	374.33	43.1	56.67	11.29	284.67	37.68	0.018857343771814	-0.840356	normal	1.09500250163731e-08	-2.81274	down
blue	TRINITY_DN7020_c1_g1	MYB24	LOC120214426	3159	137.91	1911	69.75	998	50.61	247	6.57	49	2.94	201	7.22	2312	77.35	1340	59.69	2505	65.65	267	12.82	126	6.91	90	4.69	2137	108.41	2054	54.44	1046	52.25	2022.67	86.09	165.67	5.58	2052.33	67.56	161	8.14	1745.67	71.7	0.237643699749789	-0.425903	normal	1.10496100930008e-13	-3.42393	down
blue	TRINITY_DN7698_c0_g1	HSF24	LOC120141775	5780	480.66	6307	404.56	4473	410.63	2759	95.62	1024	70.39	1907	90.69	7335	425.94	5105	412.54	8978	435.31	3101	247.21	3424	320.25	3441	258	4302	413.16	7938	393.91	4423	371.62	5520	431.95	1896.67	85.57	7139.33	424.6	3322	275.15	5554.33	392.9	0.737839197810433	-0.0614505	normal	0.0390818212643535	-0.463695	normal
blue	TRINITY_DN970_c0_g1	TIFY10A	LOC111285264	557	99.12	337	45.99	350	70.73	80	7.34	27	5.83	48	6.16	535	67.36	229	38.24	559	55.59	166	29.52	156	32.29	132	25.37	169	34.57	680	70.57	191	35.83	414.67	71.95	51.67	6.44	441	53.73	151.33	29.06	346.67	46.99	0.286049893396131	-0.42375	normal	0.00558135004306306	-1.23895	down
blue	TRINITY_DN10612_c0_g1	PBS1	LOC107938096	1757	89.66	1197	48.83	632	37.55	126	3.03	93	5.7	86	2.9	1233	45.36	856	41.52	1374	40.13	210	11.28	252	15.4	285	16.23	1403	83.19	2029	62.97	1155	64.18	1195.33	58.68	101.67	3.88	1154.33	42.34	249	14.3	1529	70.11	0.169100635130745	-0.47408	normal	8.10051250713961e-07	-1.99401	down
blue	TRINITY_DN11718_c1_g1	RLK	LOC120135188	242	11.44	170	6.34	66	3.53	23	0.56	0	0	22	0.75	344	11.66	227	10.3	591	15.96	43	2.07	61	3.38	97	4.96	205	10.91	357	10.16	297	15.03	159.33	7.1	15	0.44	387.33	12.64	67	3.47	286.33	12.03	0.0976304602002872	0.817214864512227	normal	0.162966978898508	-0.959072	normal
blue	TRINITY_DN13132_c0_g1	CaMRLK	LOC120217704	1583	48.75	1647	40.68	1278	46.39	556	9.54	256	9.07	443	10.67	2252	47.16	975	29.35	3257	54.61	869	26.54	693	25.13	992	33.2	1346	48.85	1619	29.61	1020	34.99	1502.67	45.27	418.33	9.76	2161.33	43.71	851.33	28.29	1328.33	37.82	0.960277107137923	0.0145795061446243	normal	0.038391918940619	-0.567848	normal
blue	TRINITY_DN13986_c0_g1	OXI1	LOC120164949	1167	55.93	487	18.44	330	17.84	115	3	73	4.16	80	2.95	329	11.45	271	13.1	532	15.04	142	7.19	131	7.93	115	6.09	255	14.46	603	17.8	370	18.92	661.33	30.74	89.33	3.37	377.33	13.2	129.33	7.07	409.33	17.06	0.00524948657034849	-1.29193	down	3.0277258859269e-05	-2.12978	down
blue	TRINITY_DN19176_c1_g2	WAKL6	LOC120213131	532	13.7	482	9.83	381	11.08	191	2.6	52	1.57	128	2.43	846	15.67	457	11.34	1214	17.99	212	5.59	108	3.34	290	8.1	508	15.01	898	14.1	683	18.86	465	11.54	123.67	2.2	839	15	203.33	5.68	696.33	15.99	0.249984188144469	0.358330622361392	normal	0.035382316071554	-0.954786	normal
blue	TRINITY_DN6516_c0_g1	WN	--	1659	73.13	930	33.54	559	27.73	550	12.05	312	15.8	409	12.69	1253	39.77	1058	45.1	1448	36.75	359	17.05	241	12.79	307	15.09	1058	54.23	1396	37.53	614	29.37	1049.33	44.8	423.67	13.51	1253	40.54	302.33	14.98	1022.67	40.38	0.660810657063998	-0.164133	normal	0.000227737786668269	-1.56026	down
blue	TRINITY_DN7215_c0_g1	IKU2	LOC120203483	4020	98.8	5267	102.12	3629	100.46	2169	25.68	1245	32.2	1566	25.97	7207	128.56	4680	112.93	8266	118.12	1349	34.87	907	30.54	1086	31.6	2684	84.12	6593	96.12	2158	57.44	4305.33	100.46	1660	27.95	6717.67	119.87	1114	32.34	3811.67	79.23	0.208690697162101	0.218006095121094	normal	1.12147842625124e-13	-1.68757	down
blue	TRINITY_DN7674_c0_g1	At1g54610	LOC111289494	360	15.74	387	12.33	81	3.93	120	2.7	25	1.12	60	1.64	358	12.82	247	9.47	373	8.96	97	3.86	23	1.34	42	2.06	311	16.92	296	7.56	165	8.33	276	10.67	68.33	1.82	326	10.42	54	2.42	257.33	10.94	0.832366718267191	-0.104617	normal	0.00318288496399432	-2.06095	down
blue	TRINITY_DN8113_c1_g1	RLCKVII	LOC120151123	1818	55.51	1597	33.17	1341	43.06	1011	14.63	533	16.14	664	13.6	1807	33.94	935	26.94	2480	41.38	499	15.05	535	18.44	595	15.33	1222	42.76	2082	33.3	921	25.89	1585.33	43.91	736	14.79	1740.67	34.09	543	16.27	1408.33	33.98	0.186038564334826	-0.364053	normal	9.93799637971719e-06	-1.29837	down
blue	TRINITY_DN8865_c0_g1	CDKG-2	LOC120193475	2625	89.45	2758	73.4	1804	68.86	1220	21.34	720	27.64	812	19.86	2620	63.75	1621	51.89	2719	52.78	1236	40.77	1112	44.37	1144	41.69	1462	52.73	2856	56.13	1609	56.58	2395.67	77.24	917.33	22.95	2320	56.14	1164	42.28	1975.67	55.15	0.0314629595493276	-0.468737	normal	0.00145485912931362	-0.774314	down
blue	TRINITY_DN8958_c0_g1	RLCKVII	LOC120161745	2335	136.94	2479	106.5	1327	75.03	876	29.33	226	12.84	656	29.88	2531	96.56	1546	83.16	3102	96.98	947	54.7	1018	67.6	881	52.29	1525	91.29	2098	71.74	1080	69	2047	106.16	586	24.02	2393	92.23	948.67	58.2	1567.67	77.34	0.401920632253503	-0.202154	normal	0.00299848976321972	-0.822534	down
blue	TRINITY_DN216153_c0_g1	POD54	LOC120150153	722	39.47	624	26.85	212	13.1	48	1.35	26	1.64	41	1.62	605	23.68	469	24.57	435	13.56	34	1.89	0	0	21	1.24	855	52.68	939	30.85	254	14.85	519.33	26.47	38.33	1.54	503	20.6	18.33	1.04	682.67	32.79	0.387835069657983	-0.37435	normal	1.52311902873036e-08	-4.57601	down
blue	TRINITY_DN8559_c0_g1	POD11	LOC120166849	444	15.09	334	9.48	160	6.66	0	0	0	0	0	0	347	9.18	326	11.75	388	8.05	19	0.64	16	0.73	76	2.98	313	11.74	288	6.15	263	9.92	312.67	10.41	0	0	353.67	9.66	37	1.45	288	9.27	0.63600310492084	-0.198501	normal	7.08647022254749e-05	-2.79959	down
blue	TRINITY_DN29445_c0_g2	GST7	LOC120142176	5021	400.69	3825	239	3939	355.88	1976	81.46	970	90.64	1489	85.87	5177	295.16	3446	262.59	6672	302.6	1854	150.16	2767	258.52	2763	238.38	5298	477.89	6799	324.18	2861	243.68	4261.67	331.86	1478.33	85.99	5098.33	286.78	2461.33	215.69	4986	348.58	0.368403462515592	-0.22646	normal	0.0716707047650879	-0.555041	normal
brown	TRINITY_DN1242_c0_g1	NDH2	--	0	0	29	0.81	70	2.81	720	13.19	295	12.02	639	16.38	20	0.51	5	0.19	20	0.41	528	19.14	107	4.45	142	5.45	0	0	38	0.9	8	0.3	33	1.21	551.33	13.86	15	0.37	259	9.68	15.33	0.4	--	--	--	0.00325408015039771	3.0740931605844	up
brown	TRINITY_DN1242_c0_g2	COL16	LOC105798681	23	0.92	114	3.61	87	3.94	1172	24.26	716	33.05	949	27.49	14	0.4	147	5.66	80	1.83	741	30.35	152	7.15	483	20.95	30	1.35	107	2.59	56	2.41	74.67	2.82	945.67	28.27	80.33	2.63	458.67	19.48	64.33	2.12	0.91119870336836	-0.102844	normal	5.73460693900899e-06	2.87771220592783	up
brown	TRINITY_DN16333_c0_g1	COL5	LOC120192654	929	39.24	1638	54.8	1253	60.81	8318	187.76	4819	245.53	5878	186.28	1356	40.95	1280	52.1	1684	40.84	5863	254.8	2705	137.17	3757	174.82	717	33.7	2328	59.64	1315	59.57	1273.33	51.62	6338.33	206.52	1440	44.63	4108.33	188.93	1453.33	50.97	0.409594053127829	-0.209744	normal	1.14651393664589e-10	1.9407524821477	up
brown	TRINITY_DN16582_c0_g1	ATP23	LOC120136487	377	16.96	626	21.38	538	26.84	3456	80.15	1333	69.53	2772	90.13	930	29.7	780	32.86	1019	26.24	1488	67.39	951	48.22	943	44.41	446	21.96	1078	28.81	692	32.13	513.67	21.73	2520.33	79.94	909.67	29.6	1127.33	53.34	738.67	27.63	0.143517395730828	0.423463305211726	normal	1.51873113665933e-05	1.38029747487491	up
brown	TRINITY_DN17804_c0_g1	LOB37	LOC120126722	178	10.63	693	32.38	426	28.71	6753	206.77	2493	171.63	4876	208.88	514	21.89	515	29.37	621	21.08	941	57.01	503	35.05	753	48.48	125	8.41	1057	37.78	326	20.76	432.33	23.91	4707.33	195.76	550	24.11	732.33	46.85	502.67	22.32	0.969290367479304	0.0161449697483864	normal	0.014489653130585	1.06273879421691	normal
brown	TRINITY_DN24711_c0_g1	C3H23	LOC108486352	520	43.43	1239	80.28	492	46.6	6902	289.53	3215	307.22	4732	277.93	856	50.66	578	46.27	1308	61.79	2395	203.37	1334	129.01	1847	166.13	336	30.91	1559	77.92	808	71.75	750.33	56.77	4949.67	291.56	914	52.91	1858.67	166.17	901	60.19	0.759521575894763	-0.0947195	normal	3.38766790251476e-07	1.6394847638642	up
brown	TRINITY_DN2827_c1_g1	HAT5	LOC105787797	518	29.53	1555	69.23	1173	75.43	9754	282.36	4319	282.24	7133	289.35	1492	60.6	950	51.84	2113	68.15	2242	129.93	1722	114.92	1941	119.55	491	31.69	1937	66.38	1037	62.24	1082	58.06	7068.67	284.65	1518.33	60.2	1968.33	121.47	1155	53.44	0.878381700241186	0.0527668879627265	normal	0.000955461933314628	1.1456312895951	up
brown	TRINITY_DN3680_c0_g1	COL16	LOC105786119	20	0.85	255	8.82	202	9.85	3860	85.18	2097	103.08	2720	83.75	230	6.96	151	6.29	288	6.94	1299	57.03	585	29.81	837	38.6	70	3.33	273	7.13	139	6.28	159	6.51	2892.33	90.67	223	6.73	907	41.81	160.67	5.58	0.906747912412202	0.0816590331855549	normal	6.69892143605515e-06	2.78982964830472	up
brown	TRINITY_DN3680_c0_g2	COL16	--	0	0	0	0	27	1.72	815	23.7	458	29.88	553	22.5	7	0.28	3	0.16	33	1.06	121	6.95	27	1.78	111	6.76	0	0	13	0.44	15	0.9	9	0.57	608.67	25.36	14.33	0.5	86.33	5.16	9.33	0.45	--	--	--	0.0301863817939954	3.24080630634989	normal
brown	TRINITY_DN4680_c0_g1	AGT2	LOC120141843	40	1.78	138	4.86	114	5.8	4234	97	1978	102.03	3001	96.35	251	8.26	223	9.53	336	8.66	534	24.55	308	16.23	587	28.77	126	6.59	362	9.65	208	9.65	97.33	4.15	3071	98.46	270	8.82	476.33	23.18	232	8.63	0.0373066154511291	1.07463072384982	normal	3.98161995539421e-07	2.56121437505383	up
brown	TRINITY_DN7095_c0_g1	LSD1	LOC120159957	82	3.54	135	5.95	300	19.96	15627	466.1	7088	501.69	11680	488.98	159	6.93	169	9.44	268	8.59	945	61.67	699	49.35	1162	75.16	0	0	122	4.02	49	2.88	172.33	9.82	11465	485.59	198.67	8.32	935.33	62.06	57	2.3	0.589922039031214	-0.317979	normal	3.37870920216581e-07	2.59865787748735	up
brown	TRINITY_DN7101_c0_g1	RAD6	LOC120115419	180	15.31	401	28.51	269	26.1	16804	845.8	6596	767.95	12255	866.59	334	19.88	127	10.53	393	19.86	646	61.02	797	91.41	929	99.54	27	3.17	300	14.55	226	20.13	283.33	23.31	11885	826.78	284.67	16.76	790.67	83.99	184.33	12.62	0.283715198737003	-0.451704	normal	7.55012404883687e-07	1.78344367501136	up
brown	TRINITY_DN8270_c0_g1	ERF105	LOC120173017	85	11.16	197	20.03	121	18.01	3531	239.09	1064	166.5	2535	240.11	153	14.28	85	10.56	186	13.75	1271	168.01	646	98.96	1096	155.5	0	0	107	8.29	145	20.18	134.33	16.4	2376.67	215.23	141.33	12.86	1004.33	140.82	84	9.49	0.470002541574197	-0.342883	normal	9.34177641100365e-18	3.18905594465405	up
brown	TRINITY_DN8833_c0_g1	AUX28	LOC120151403	627	45.14	2325	129.22	1528	125.47	7914	308.41	3522	287.08	5404	298.24	1590	77.86	1233	79.85	2206	89.99	3175	222.34	1515	132.43	2671	204.08	663	51.9	1960	85.68	993	71.18	1493.33	99.94	5613.33	297.91	1676.33	82.57	2453.67	186.28	1205.33	69.59	0.530713164462035	-0.222641	normal	0.00978859748232247	1.00796993801863	up
brown	TRINITY_DN8912_c0_g3	CECI	LOC120203026	8	0.32	47	1.2	66	2.59	657	10.73	268	10.09	493	11.16	53	1.24	75	2.21	110	2.34	247	8.92	94	3.73	240	7.94	0	0	100	2.17	77	2.37	40.33	1.37	472.67	10.66	79.33	1.93	193.67	6.86	59	1.51	0.54701691808563	0.522702121082415	normal	0.0015582182730472	2.46363584722566	up
brown	TRINITY_DN13056_c0_g1	CIPK6	LOC111284734	1673	77.63	3203	111.5	1616	82.69	28754	659.39	14386	735.31	20580	665.76	2816	92.6	1981	81.1	3029	75.34	5835	267.45	2963	162.07	4658	229.05	1623	78.08	3410	91.5	2141	96.88	2164	90.61	21240	686.82	2608.67	83.01	4485.33	219.52	2391.33	88.82	0.665318713669447	-0.0946982	normal	1.29843264095958e-06	1.35007287599512	up
brown	TRINITY_DN13358_c0_g1	PRK2	LOC120189344	4	0.12	33	0.77	37	1.22	401	6.06	166	5.53	309	6.54	14	0.3	41	1.17	17	0.29	77	2.33	57	1.99	60	1.9	0	0	1	0.02	0	0	24.67	0.7	292	6.04	24	0.59	64.67	2.07	0.33	0.01	0.803616690373307	-0.292987	normal	0.0954275161494247	1.63352863457491	normal
brown	TRINITY_DN2035_c0_g1	CEPR2	LOC120118538	1821	34.17	3808	54.91	3765	80.43	26518	254.01	18736	396.65	17963	241.24	4886	65.84	4168	74.64	7433	79.14	8304	154	7005	149.34	13309	262.11	2460	50.94	4363	51.01	3345	69.1	3131.33	56.5	21072.3	297.3	5495.67	73.21	9539.33	188.48	3389.33	57.02	0.222107093113169	0.362511100420462	normal	5.63965214305463e-08	1.8582480059093	up
brown	TRINITY_DN28356_c0_g1	LRR-RLK	LOC120212286	0	0	45	1	30	0.95	375	5.42	270	8.67	243	4.92	9	0.18	29	0.78	37	0.59	64	1.83	118	3.88	170	5.15	0	0	21	0.36	62	1.86	25	0.65	296	6.34	25	0.52	117.33	3.62	27.67	0.74	0.82584395342674	-0.313504	normal	0.0170267725675869	2.58291224494755	normal
brown	TRINITY_DN5610_c0_g1	GLR3.1	LOC120122567	619	7.11	1208	13.43	1129	17.89	5223	40.61	2770	46.84	3556	39.36	2133	20.64	1266	16.53	2054	16.25	2736	42.14	1904	32.89	2509	41.14	988	14.2	1620	13.41	1027	14.14	985.33	12.81	3849.67	42.27	1817.67	17.81	2383	38.72	1211.67	13.92	0.135798298669007	0.44992759245205	normal	9.46370912157688e-07	1.52089720915339	up
brown	TRINITY_DN5834_c0_g1	G11A	LOC120146830	699	26.09	1915	57.43	1122	49.04	5139	101.85	2520	111.59	3471	96.83	1270	34.46	1096	39.74	2002	43.75	1716	66.32	1121	50.29	1924	78.87	584	25.7	1852	43.08	985	39.99	1245.33	44.19	3710	103.42	1456	39.32	1587	65.16	1140.33	36.26	0.591584265692925	-0.1613	normal	0.0504924999255992	0.65665818960331	normal
brown	TRINITY_DN6547_c0_g1	SRK2I	--	453	40.89	993	70.03	607	62.03	4260	198.36	1849	195.76	2915	189.9	678	43.67	457	39.29	853	43.65	1259	115.14	1139	120.25	825	80.49	366	37.45	904	48.61	542	52.1	684.33	57.65	3008	194.67	662.67	42.2	1074.33	105.29	604	46.05	0.120153443581029	-0.44711	normal	0.00277618376280437	0.949995479450821	up
brown	TRINITY_DN8881_c1_g1	PHOT1	LOC108464175	28	1.43	73	3.12	96	6.21	832	23.26	271	17.54	511	19.92	53	2.04	73	3.56	48	1.57	160	8.73	105	6.6	131	7.87	0	0	59	1.81	42	2.44	65.67	3.59	538	20.24	58	2.39	132	7.73	33.67	1.42	0.483247943775948	-0.534916	normal	0.0719403362601783	1.21902070075031	normal
brown	TRINITY_DN90126_c0_g1	PRK1	--	33	1.52	77	2.89	58	2.97	799	19.27	392	20.12	527	17.75	138	4.47	96	4.23	87	2.27	134	6.01	208	11.65	212	10.37	0	0	62	1.69	40	1.94	56	2.46	572.67	19.05	107	3.66	184.67	9.34	34	1.21	0.345132950002434	0.587947871835865	normal	0.000487156905680781	2.01955851026411	up
brown	TRINITY_DN10147_c1_g1	POD73	LOC120169572	161	7.8	1196	45.05	407	22.28	7182	178.82	3601	200.75	4912	171.28	685	23.78	307	14.26	718	19.76	808	39.91	679	38.57	1578	82.64	129	7.04	371	10.76	202	10.46	588	25.04	5231.67	183.62	570	19.27	1021.67	53.71	234	9.42	0.467684941931046	-0.368262	normal	0.0221846931677462	1.20259442361161	normal
brown	TRINITY_DN2663_c0_g1	NECT3	LOC120183937	387	33.63	840	48.63	672	66.85	3541	136.65	1414	122.02	2679	148.28	813	37.79	872	55.77	1233	49.28	1647	170.76	1230	142.05	1146	111.25	417	31.94	891	37.04	754	63.65	633	49.7	2544.67	135.65	972.67	47.61	1341	141.35	687.33	44.21	0.482819539133473	0.225788613490872	normal	3.17177980859283e-05	1.34868575284593	up
brown	TRINITY_DN5794_c0_g1	Fd2	LOC120144986	712	83.93	1455	133.04	1590	212.38	11450	693.81	5130	714.64	8203	695.23	1148	96.37	1092	121.87	1985	132.02	4908	582.63	2010	276.17	1730	219.85	464	62.4	1275	88.9	1002	125.31	1252.33	143.12	8261	701.23	1408.33	116.75	2882.67	359.55	913.67	92.2	0.390785420224871	-0.293622	normal	0.000640812699664004	1.40844228668697	up
brown	TRINITY_DN127_c0_g1	CAB7	LOC105785755	379	37.5	779	67.03	990	145.71	5331	403.68	3004	579.51	3918	417.26	888	79.44	734	77.54	984	64.62	3807	512.01	2001	296.92	1795	235.27	422	60.89	1130	87.8	921	120.86	716	83.41	4084.33	466.82	868.67	73.87	2534.33	348.07	824.33	89.85	0.669593675781957	-0.164542	normal	5.49377025403131e-07	2.0227486974616	up
brown	TRINITY_DN13078_c0_g1	CAB3	LOC120133157	746	51.66	1660	109.67	2453	218.02	14692	611.31	7471	715.82	10883	634.18	1719	108.72	1227	91	2813	116.06	10314	857.39	3865	361.54	4920	418.71	875	110.31	1858	85.71	1612	136.26	1619.67	126.45	11015.3	653.77	1919.67	105.26	6366.33	545.88	1448.33	110.76	0.48907838561717	-0.280191	normal	8.93327205066906e-07	2.14811938668428	up
brown	TRINITY_DN10593_c0_g1	POR	LOC108457799	84	4.12	151	5.8	169	9.26	2005	50.16	856	48.1	1422	49.71	202	7.12	88	4.04	145	4.01	880	43.57	335	19.13	323	16.96	0	0	129	3.77	82	4.28	134.67	6.39	1427.67	49.32	145	5.06	512.67	26.55	70.33	2.68	0.509321466430587	-0.349516	normal	2.61438040124223e-05	2.12986695868062	up
[truncated: 53 more columns]
